1 **Title:** Does where you live influence what you are made of? Spatial correlates of chemical traits across commonly  
2 occurring boreal plants

3

4 **Authors:** Travis R Heckford<sup>1</sup>, Shawn J. Leroux<sup>1</sup>, Eric Vander Wal<sup>1</sup>, Matteo Rizzuto<sup>1</sup>, Juliana Balluffi-Fry<sup>1</sup>, Isabella  
5 C. Richmond<sup>1</sup>, Yolanda F. Wiersma<sup>1\*</sup>

6

7 <sup>1</sup>Department of Biology, Memorial University of Newfoundland. 230 Elizabeth Avenue, St. John's Canada

8 \*Corresponding author

9 Travis R. Heckford (trheckford@mun.ca): 0000-0002-3993-6450

10 Shawn J. Leroux (sleroux@mun.ca): 0000-0001-9580-0294

11 Eric Vander Wal (eric.vanderwal@mun.ca): 0000-0002-8534-4317

12 Matteo Rizzuto (mrizzuto@mun.ca): 0000-0003-3065-9140

13 Juliana Balluffi-Fry (jballuffifry@mun.ca): 0000-0002-2365-1055

14 Isabella C. Richmond (icrichmond@mun.ca): 0000-0001-5079-8442

15 Yolanda F. Wiersma (ywiersma@mun.ca): 0000-0003-4604-9240, Ph. 01-709-864-7499

16

17

18 **Acknowledgements:**

19 This research was funded by the Government of Newfoundland and Labrador Centre for Forest Science Innovation

20 (CFSI); Memorial University of Newfoundland SEEDS funding to SJL, EVW, YFW; Mitacs Accelerate Grant to

21 YFW, SJL and EVW; Canada Foundation for Innovation funding to YFW, and the Natural Sciences and

22 Engineering Research Council of Canada (Discovery Grant to YFW). In-kind support was provided by Parks

23 Canada – Terra Nova National Park and the CFSI, with thanks to Janet Feltham and Blair Adams. In addition, we

24 would also like to thank the Landscape Ecology and Spatial Analysis lab at Memorial University of Newfoundland.

25 Thank you to three anonymous reviewers for helpful comments that helped to substantially improve an earlier

26 version of the manuscript.

27

28 **Author contributions:**

29 TH, SJL, YFW, EVW and MR contributed to the study conception and design. TH and MR collected data and  
30 analyses were performed by TH. The manuscript was drafted by TH and all authors commented on previous  
31 versions of the manuscript. All authors have read and approved the final manuscript.

32 **Abstract**

33 *Context:* Spatially explicit drivers of foliar chemical traits link plants to ecosystem processes to reveal landscape  
34 functionality. Specifically, foliar elemental, stoichiometric, and phytochemical (ESP) compositions represent key  
35 indicator traits.

36 *Objectives:* Here, we investigate the spatial drivers of foliar ESP at the species level and across species at the trait  
37 level for five commonly occurring boreal forest understory plants.

38 *Methods:* On the island of Newfoundland, Canada, we collected foliar material from four chronosequenced forest  
39 grids. Using response variables of foliar elemental (C, N, P, percent and quantity), stoichiometric (C:N, C:P, N:P),  
40 and phytochemical (terpenoids) composition, we tested multiple competing hypotheses using spatial predictors of  
41 land cover (e.g., coniferous, deciduous, mixedwood), productivity (e.g., enhanced vegetation index), biotic (e.g.,  
42 stand age/height, canopy closure) and abiotic (e.g., elevation, aspect, slope) factors.

43 *Results:* We found evidence to support spatial relationships of foliar ESP for most species (mean  $R^2 = 0.22$ , max =  
44 0.65). Spatial variation in elemental quantity traits of C, N, P were related to land cover along with biotic and abiotic  
45 factors for 2 of 5 focal species. Notably, foliar C, C:P, and sesquiterpene traits between different species were  
46 related to abiotic factors. Similarly, foliar terpenoid traits between different species were related to a combination of  
47 abiotic and biotic factors (mean  $R^2 = 0.26$ ).

48 *Conclusions:* Spatial-trait relationships mainly occur at the species level, with some commonalities occurring at the  
49 trait level. By linking foliar ESP traits to spatial predictors, we can map plant chemical composition patterns that  
50 influence landscape-scale ecosystem processes.

51 **Key words:** Spatial distribution modelling; plant traits; ecological interactions; ecological stoichiometry;  
52 phytochemicals

## 53           1. Introduction

54 Environmental factors are known to influence the foliar traits of plants. For instance, differences in overstory  
55 vegetation (i.e., landcover; Hallett & Hornbeck, 1997), productivity (Radwan & Harrington, 2011), community  
56 structure (Sedio et al., 2017), and topographic conditions (Müller et al., 2017) may influence foliar chemical,  
57 physiological, and morphological traits (Poorter & Bongers, 2006). Chemical traits such as elemental concentration  
58 (% and quantity Carbon, Nitrogen, and Phosphorus), stoichiometric ratios (elemental concentrations on a biomass  
59 basis, specifically molar C:N, N:P, and C:P ratios), and secondary carbon based compounds (terpenoids, phenols)  
60 are often useful indicators of ecosystem processes. These traits can be indicators of processes such as decomposition  
61 (Diaz et al., 2004), carbon sequestration/primary production (Harpole et al., 2011; Hessen et al., 2004),  
62 evapotranspiration (Liu et al., 2019), and trophic interactions (Bryant et al., 1983; Hunter, 2016). Environmental  
63 factors vary across the landscape and thus, species level intraspecific trait variability (ITV) mapped in response to  
64 spatial gradients of varying environmental conditions may reveal how underlining ecological processes contribute to  
65 spatial patterns that define landscape functionality (Harvey et al., 2017; Schmitz et al., 2018). As well, across  
66 species, common environmental factors may drive interspecific trait variability, and if so, this provides room to  
67 devise community-level generalities of landscape function (Santiago et al., 2004). Here, we investigate which  
68 environmental factors drive the spatial variability of foliar elemental (E), stoichiometric (S) and phytochemical (P)  
69 traits (hereafter labelled “ESP traits”) at a species level for common boreal plants, and we compare these factors  
70 across the five species to determine if there are shared community-level drivers of traits.

71           Across the landscape, differing environmental conditions influence plant trade-offs of resource acquisition  
72 and use, and as such the ITV of foliar traits (Lavorel et al., 2011). For instance, plants growing under different  
73 overstory vegetation (e.g., deciduous, coniferous, and mixedwood land cover types), which experience varied light  
74 conditions via canopy vertical and horizontal composition, may redistribute foliar N and P resources to optimize  
75 growth while stabilizing for competitive interactions (Hassell et al., 1994). As well, nutrient recycling pathways may  
76 vary by landcover types via litter inputs and canopy temperature/precipitation controls (Barron-Gafford et al., 2012;  
77 Philben et al., 2016) which can influence soil productivity (Krishna & Mohan, 2017) N and P resource availability  
78 (Gartner & Cardon, 2004; Knops et al., 2002), and plant N and P use efficiencies (Ashton et al., 2010). Moreover,  
79 topographic gradients of elevation, aspect, and slope further define temperature, precipitation, and solar insolation

80 inputs (Macek et al., 2019) and as such can influence resource allocation (Müller et al., 2017). Indeed, many factors  
81 likely influence resource trade-offs by plants and their foliar ESP traits, with the range of ITV constrained by a  
82 species resource strategy (Grime & Pierce, 2012). Spatial gradients of environmental conditions create a landscape  
83 of resource trade-offs where the ITV of foliar ESP traits provides mapped heterogeneity of inferred ecosystem  
84 processes.

85 Identifying the spatial covariates of traits linked to ecosystem processes is an important topic in landscape  
86 ecology (Pickett & Cadenasso, 1995; Turner, 1989). For instance, the distribution and movement of energy and  
87 matter is a central focus for understanding landscape functionality via pattern and process relationships (Lavorel et  
88 al., 2011; Shen et al., 2011; Monica Goigel Turner, 2005). Foliar ESP traits provide a direct link to thermodynamics  
89 and entropy processes at landscape extents (Elser & Hamilton, 2007; Vranken et al., 2015). For example, foliar N  
90 and P concentration and N:P ratios have been linked to primary productivity (Elser et al., 2010), while  
91 stoichiometric traits have been associated with nutrient limitation and community structure processes (Harpole et al.,  
92 2011; Urbina et al., 2017). Phytochemical defense traits have been linked to trophic interactions, spatial flows of  
93 energy and matter, and nutrient recycling processes (Hunter, 2016). At the landscape level, spatial covariates of land  
94 cover, productivity, forest structure, and topography are known drivers of foliar ESP trait variability. However,  
95 different covariates likely influence different foliar traits between species. For example, balsam fir (*Abies balsamea*)  
96 and red spruce (*Picea rubens*) foliar N and P follow elevational gradients (Richardson, 2004), while Scots pine  
97 (*pinus sylvestris*) shifts foliar stoichiometric content in response to soil nutrients (i.e., site level productivity; He et  
98 al., 2019), and eucalyptus (*Eucalyptus urophylla*) foliar P decreases with stand age (Fan et al., 2015). Thus, a species  
99 level approach to identifying spatial covariates of foliar ESP traits will allow us to obtain refined estimates that are  
100 comparable across species and traits to derive potential generalities.

101 Here, we use spatially explicit covariates to investigate correlates of foliar ESP traits for five commonly  
102 occurring juvenile boreal forest species. Our spatial predictors of land cover (i.e., coniferous, deciduous,  
103 mixedwood), productivity (i.e., enhanced vegetation index), biotic factors (i.e., structural conditions of stand age,  
104 height, and canopy closure), and abiotic factors (i.e., elevation, aspect, and slope), represent known and/or suggested  
105 drivers of foliar ESP traits (see Table 1). Our aim is to investigate the spatial relationships influencing foliar ESP  
106 traits by interrogating covariate selection for generalities at the trait and species level. Our integrative approach

107 investigates multiple components of foliar elemental and nutritional traits and their spatial drivers. This allows us to  
108 link spatial patterns to ecosystem processes that contribute to landscape function.

109

## 110 **2. Methods**

### 111 *2.1. Study site and focal species description*

112 Our study area is located on the eastern side of the island and Newfoundland, Canada (Fig. 1a; a detailed description  
113 of Fig. 1, is provided in Appendix 1). Here, the bedrock is generally a mixture of crystalline Paleozoic strata with  
114 upland dominated by hummocky to ridged sandy morainal depositions (South, 1983). The vegetative cover is  
115 dominated primarily by intermediate-aged, closed canopy, forest stands of balsam fir (*Abies balsamea*) and black  
116 spruce (*Picea mariana*) on steep, moist, upland areas. Alternatively, disturbed areas are dominated by paper birch  
117 (*Betula papyrifera*), trembling aspen (*Populus tremuloides*), and black spruce with drier sites consisting of black  
118 spruce and heaths of kalmia (*Kalmia angustifolia*) (South, 1983). On average this region experiences annual  
119 temperature of 4.5°C, with a summer and winter mean of 12.5°C and -3.5°C, and mean annual precipitation of 100-  
120 300 cm (South, 1983).

121 Our understory focal species consist of two coniferous species: balsam fir (*Abies balsamea*), black spruce  
122 (*Picea mariana*), two deciduous species: red maple (*Acer rubrum*), white birch (*Betula papyrifera*), and one  
123 herbaceous plant: lowbush blueberry (*Vaccinium angustifolia*). Our focal species commonly occur across the study  
124 region and are largely co-distributed geographically across North America. Moreover, our focal species represent  
125 common forage for the dominant herbivores within the boreal system: moose (*Alces alces*) and snowshoe hare  
126 (*Lepus americanus*). As such, their foliar traits provide us with a useful measure of resource distribution by which  
127 we can infer spatial patterns of herbivory (Balluffi-Fry et al., 2020; Rizzuto et al., 2019).

128 For each of our study species we assessed foliar traits of elemental concentration (i.e., percent and quantity C,  
129 N, and P) and stoichiometric ratio (i.e., C:N, C:P, and N:P). For our coniferous species, balsam fir and black spruce  
130 that have constituent phytochemical defence strategies, we assessed foliar phytochemical traits of terpene,  
131 monoterpene, monoterpene alcohol, monoterpene ester, sesquiterpene, and phytochemical diversity.

132

133        2.2. *Data collection*

134        The following sections describe how we collected shrub belt, foliar material, and biomass data.

135        2.2.1. Sampling design

136        In black spruce leading stands, which is the predominant forest type for this region (South, 1983), we set up four  
137        chronosequenced meandering transect grids (25 ha), differing in age by 20 year intervals (Fig. 1b; centroid locations  
138        for each grid: Bloomfield 48.34°N, -53.98°W; Unicorn 48.63°N, -54.01°W; Terra Nova North 48.62°N, -53.97°W;  
139        Dunphy's Pond 48.49°N, -54.05°W). Although heterogeneity in forest structure does exist across our grids,  
140        including differences in tree age, height and canopy density, our sampling locations were designed to capture a  
141        representative snapshot of forest structure in this region (see Appendix 2 for a comparison of forest structure  
142        sampled versus available). These grids were originally designed for snowshoe hare live trapping, to investigate  
143        animal spatial ecology related to spatially variable foliar ESP resources. Each grid is comprised of 50 sampling  
144        locations (Fig. 1b).

145        2.2.2. Shrub belt

146        At each sample location, we set up a 22.6 m diameter circular plot (Fig. 1c). Within each plot, we collected density  
147        estimates for each of our study species along a 22.6 m long and 1 m wide shrub belt transect (Fig. 1c). Moving in a  
148        north to south direction, along the belt, for each of our study species encountered, we measured height and basal  
149        diameter, and the distance at which it was encountered, for a maximum of five individuals per height class: 0-50 cm,  
150        51-100 cm, 101-150 cm, and 151-200 cm, denoted as A, B, C, and D respectively (Fig. 1d). We restricted our  
151        sampling to species within 0-2 m heights as these individuals represent the available forage for common boreal  
152        herbivores such as moose and snowshoe hare.

153        2.2.3. Foliar material

154        Within our circular plots, we collected representative foliar material from each intercardinal corner. Starting in the  
155        NE corner, we clipped foliar material (i.e., terminal and lateral leaves) and then moved to the next corner and  
156        clipped a similar amount of foliar material, we continued this process, moving clockwise between the plot corners,  
157        until we acquired an approximately 20 g foliar sample. We also measured height and basal diameter (used for  
158        augmenting shrub belt data described below) of each individual sampled. Samples of balsam fir (n = 95), black  
159        spruce (n = 157), red maple (n = 91), white birch (n = 71), and lowbush blueberry (n = 160) were frozen at -20C

160 until they were sent for foliar elemental analysis at the Agriculture Food Lab (AFL) at the University of Guelph  
161 Ontario, Canada. Foliar C and N was determined using an Elementar Vario Macro Cube. Foliar P was determined  
162 using a microwave acid digestion CEM MARSxpress microwave system and brought to volume using Nanopure  
163 water. The clear extract supernatant was further diluted by 10 to accurately fall within calibration range and reduce  
164 high level analyte concentration entering the inductively coupled plasma mass spectrometry (ICP-MS) detector  
165 (Poitevin, 2016). Foliar phytochemical analysis for balsam fir (n = 104) and black spruce (n = 163) was performed  
166 at the Laboratoire PhytoChemia Inc. in Quebec, Canada, foliar terpenoid composition was determined using a gas  
167 chromatography solvent extraction with an internal standard and a correction factor (Cachet et al., 2016).  
168 Elemental/stoichiometric and phytochemical samples differ due to the amount of foliar material needed for each  
169 analysis. Less foliar material is needed to perform the phytochemical analysis; thus, we were able to have more  
170 samples processed. See Appendix 3 for a complete list of individual terpenoid compounds found in our balsam fir  
171 and black spruce foliar samples.

#### 172 2.2.4. Biomass

173 To determine the foliar biomass of new growth material for our focal species we collected all of the new growth  
174 foliar material from approximately 50 individuals. We collected these individuals along the periphery of our study  
175 grids, in randomly selected locations to avoid destructive sampling of foliage in our long-term monitoring grids. We  
176 sampled individuals evenly across height classes to obtain a representative sample. In addition, we measured the  
177 height and basal diameter for each individual sampled (Fig. 1d). Biomass samples were dried at 50°C for 2-3 days.  
178 We used the resulting dry weights to perform allometric modelling (described below).

179

#### 180 2.3. *Constructing foliar ESP response variables*

181 Following Leroux et al. (2017), we used three pieces of information to construct foliar ESP distribution models;  
182 shrub belt data to determine plot level species density, foliar material to extract elemental percentages (i.e., % C, N,  
183 and P) and phytochemical composition (raw basis mg/g), and biomass data to fit allometric models. We fit  
184 allometric models using biomass as a function of height and basal diameter for each of our study species (goodness  
185 of fit adjusted R<sup>2</sup> for balsam fir (0.82), black spruce (0.80), red maple (0.83), white birch (0.79), and lowbush  
186 blueberry (0.47); see Appendix 4). The estimates of allometric correlates allow us to parameterize shrub belt density



187 data and predict plot level biomass estimates based on density of species in their respective height classes (Fig. 1d,f).  
188 We then summed height class biomass estimates at the plot level. In the few instances where we did not encounter a  
189 species on the shrub belt but had collected foliar material within that plot, we augmented shrub belt data by adding  
190 the total number of individuals sampled for foliar material as ceiling estimate of abundance for a given height class  
191 in that plot (see Appendix 5 for details). To acquire foliar elemental quantity traits, we divided plot level biomass by  
192 the plot area (401.15 m<sup>2</sup>) multiplied by foliar elemental percentages. To acquire foliar stoichiometric traits, we  
193 divided foliar elemental quantity traits of C, N and P by their respective molar masses and divided the resulting  
194 values together to get ratios of C:N, C:P, and N:P (Fig. 1f). Similarly, to acquire phytochemical traits, we divided  
195 plot level biomass by the plot area (401.15 m<sup>2</sup>) multiplied by our phytochemical raw measures.

#### 196 2.4. Statistical analyses

197 Data processing and statistical analyses were done using R and Esri software (Esri, 2020; R Core Team, 2020).  
198 Based on *a priori* reasons we used spatially explicit covariates of land cover, productivity, biotic and abiotic factors,  
199 at a resolution of 30 m, to predict ESP trait distribution across the study area (see Table 1 for hypothesis rationale).  
200 We investigated the relationship between all possible combinations of the four *a priori* covariate including a null  
201 model (n = 16 total models per response variable, Table 2 for complete model list). In addition, we confirmed the  
202 absence of collinearity among our spatial covariates. Our land cover covariate was derived from the Commission for  
203 Environmental Cooperation (*Land Cover Map of North American at 30 m Resolution*, 2017) and consists of three  
204 categorical conditions coniferous, deciduous and mixed wood. We used the Enhanced Vegetation Index (EVI, 30 m  
205 resolution) as a proxy of productivity, which does not saturate as easily as the Normalized Difference Vegetation  
206 Index under wet boreal forest conditions (Vermote et al., 2016). Using Forest Resource Inventory (FRI, originally  
207 digitized at a 1:12,500 scale and rasterized to a 30 m resolution) spatial datasets provided by the Provincial  
208 Government of Newfoundland and the Federal Government of Canada we derived three biotic covariates of stand  
209 height, age, and canopy closure, each having four factor levels. Our abiotic factors were derived from a Canadian  
210 Digital Elevation Model (*Canadian Digital Elevation Model: Product Specifications-Edition 1.1.*, 2016, originally a  
211 20 m resolution rasterized to a 30 m resolution) and includes covariates of elevation, aspect, and slope (see  
212 Appendices 6 and 7 for spatial covariate description and processing).

213 We fit General Linear Models (GLM) with the response variables of foliar percent elemental traits (C, N, P  
214 as a %), quantity elemental traits (C, N, P as g/m<sup>2</sup>), stoichiometric traits (molar ratios C:N, C:P, and N:P),  
215 phytochemical traits for our coniferous species which includes terpene, monoterpene, monoterpene alcohol,  
216 monoterpene ester, sesquiterpene, and phytochemical diversity on a raw (mg/g) and biomass basis (mg/m<sup>2</sup>). Our  
217 terpene variable is the sum of all phytochemical compounds at the plot level. Phytochemical diversity is calculated  
218 using a Shannon Diversity Index for all compounds identified per species (i.e., using our balsam fir phytochemical  
219 matrix, sites x by individual phytochemical compounds, we calculated alpha diversity; this was performed again for  
220 black spruce). We ranked models based on Akaike Information Criterion corrected for small sample size (AIC<sub>c</sub>) and  
221 only considered models within < 2 ΔAIC<sub>c</sub> and those above the null model as having evidence to support a spatial  
222 relationship. In addition, we removed models with uninformative variables (Leroux, 2019). If more than one model  
223 was within a < 2 ΔAIC<sub>c</sub> we averaged model coefficients and extracted full coefficient estimates for use in the  
224 construction of distribution models (Burnham & Anderson, 2002).

225

### 226 3. Results

227 We begin each section below by reporting patterns and pseudo R<sup>2</sup> assessments of top ranked models (ΔAIC<sub>c</sub> < 2,  
228 excluding the null model) across all five species and sub-components of foliar traits: elemental (%C, %N, %P, and  
229 quantity C, N, and P), stoichiometric (C:N, C:P, N:P ratios), and phytochemical (terpene, monoterpene,  
230 monoterpene alcohol, monoterpene ester, sesquiterpene, and diversity). In addition, for each section, we report  
231 patterns of top ranked models at the species level. Additional supporting results are reported in the appendix,  
232 including an AIC<sub>c</sub> table (Appendix 8), table of coefficient slopes and significance (Appendix 9), distribution plots of  
233 pseudo R<sup>2</sup> for traits (Appendix 10), a comparison of observed versus spatially predicted values (Appendix 11), and  
234 model coefficient estimate tables for top ranked models of traits %C, %N, and %P (Appendices 12-14), quantity C,  
235 N, and P (Appendix 15), stoichiometric ratios of C:N, C:P and N:P (Appendices 16-18) and phytochemical groups  
236 (terpene and monoterpene (Appendix 19), monoterpene alcohol and ester (Appendix 20), and sesquiterpenes and  
237 phytochemical diversity (Appendix 21)). We include the predictive distribution maps of only a subset of the models  
238 (Fig. 5); as there were 41 combinations of species-ESP trait models.

239

240           3.1. *Foliar percent elemental traits*

241       Across all species for foliar percent elemental traits (Fig. 2a), eleven models supported the data ( $R^2$  min = 0.046,  
242       max = 0.646, mean = 0.286). At the trait level (Fig. 2a), four models explain foliar percent carbon data ( $R^2$  min =  
243       0.092, max = 0.646, mean = 0.372), five models explain foliar percent nitrogen data ( $R^2$  min = 0.071, max = 0.360,  
244       mean = 0.233) and six models explain foliar percent phosphorus data ( $R^2$  min = 0.046, max = 0.472, mean = 0.242).

245           Although top ranked models vary across species (Fig. 2c), we found trait spatial relationships for all species  
246       except white birch foliar percent N and P. Notably, there are different patterns of top ranked models between species  
247       and coefficient relationships. For balsam fir, our abiotic model explained foliar percent C and P while N is explained  
248       by the combination model of land cover, EVI, and abiotic. For black spruce, our biotic and abiotic model explained  
249       foliar percent C and P although our land cover, biotic, and abiotic model is within  $\Delta AIC_c < 2$  for foliar percent C  
250       (model averaged trait distribution map is shown in Fig. 5b). In addition, we found evidence for EVI and biotic  
251       model to explain black spruce foliar N. For red maple, foliar percent C is explained by our abiotic model, foliar  
252       percent N by our land cover and biotic model, and foliar percent P by two competing top models (1) EVI, and (2)  
253       EVI and abiotic. Only white birch foliar percent C is explained by our biotic model. For lowbush blueberry, foliar  
254       percent C is explained by our land cover, biotic, and abiotic model. In contrast foliar percent N is explained by two  
255       competing top models of (1) EVI, and (2) land cover and EVI, and foliar percent P by is explained by two  
256       competing top models of (1) EVI and biotic, and (2) biotic.

257

258           3.2. *Foliar quantity elemental traits*

259       Across all species (Fig. 2b) for foliar elemental quantity traits, two out of the fifteen potential models explain foliar  
260       elemental quantity traits (across all traits  $R^2$  min = 0.183, max = 0.350, mean = 0.263) of C ( $R^2$  min = 0.193, max =  
261       0.350, mean = 0.271), N ( $R^2$  min = 0.183, max = 0.345, mean = 0.264), and P ( $R^2$  min = 0.188, max = 0.321, mean =  
262       0.254). This is, however, only for balsam fir and lowbush blueberry (Fig. 2d). At the species level, balsam fir foliar  
263       quantity C, N, and P is explained by our biotic and abiotic model. For lowbush blueberry, foliar quantity C, N, and P  
264       is explained by our land cover and abiotic model.

265

266           3.3. *Foliar stoichiometric traits*

267       Across all species (Fig. 3a) twelve of the potential fifteen models explain foliar stoichiometric traits (across all traits  
268        $R^2$  min = 0.070, max = 0.427, mean = 0.262). At the trait level (Fig. 3a), foliar C:N is explained by five top ranked  
269       models ( $R^2$  min = 0.089, max = 0.385, mean = 0.253). Foliar C:P is explained by four top ranked models ( $R^2$  min =  
270       0.070, max = 0.336, mean = 0.234). Foliar N:P is explained by six top ranked models ( $R^2$  min = 0.076, max = 0.427,  
271       mean = 0.284).

272           Again, model specificity is variable at the species level (Fig. 3b), although some geographic commonalities  
273       exist in terms of top model covariates and coefficient relationships. For balsam fir, foliar C:N is explained by our  
274       land cover, EVI, and abiotic combination model, foliar C:P by our abiotic model, and foliar N:P by two top models  
275       (1) abiotic, and (2) EVI and abiotic combination although the null model here was within  $\Delta AIC_c < 2$ . For black  
276       spruce, foliar C:N is explained by our EVI and biotic model (model averaged predictive model is shown in Fig. 5b),  
277       foliar C:P by our biotic and abiotic model, and foliar N:P by our EVI, biotic and abiotic model. For red maple, foliar  
278       C:N is explained by our land cover and biotic model, while our abiotic model explains foliar C:P, however the null  
279       model here was within  $\Delta AIC_c < 2$ . In addition, red maple foliar N:P is explained by our land cover and biotic model.  
280       For lowbush blueberry, foliar C:N is explained by our EVI model, foliar C:P by competing models of (1) biotic, and  
281       (2) EVI and biotic, and foliar N:P by four competing top models of (1) EVI, biotic and abiotic, (2) EVI and biotic,  
282       (3) land cover, EVI, biotic and abiotic, and (4) land cover, EVI and biotic. For white birch, the null model was the  
283       top ranked for all foliar stoichiometric traits.

284

285           3.4. *Foliar phytochemical traits*

286       Across all species (Fig. 4a) eight of the potential fifteen models explain foliar phytochemical traits on a raw and  
287       biomass basis (across all traits  $R^2$  min = 0.017, max = 0.272, mean = 0.138). At the trait level, terpene raw is  
288       explained by three top ranked models ( $R^2$  min = 0.047, max = 0.270, mean = 0.191), in comparison terpene on a  
289       biomass basis is explained by one top ranked model ( $R^2 = 0.270$ ). Monoterpene raw is explained by four top ranked  
290       models ( $R^2$  min = 0.041, max = 0.244, mean = 0.121), in comparison monoterpene on a biomass basis is explained  
291       by one top ranked model ( $R^2 = 0.272$ ). Monoterpenic alcohol raw is explained by two top ranked model ( $R^2$  min =  
292       0.046, max = 0.233, mean = 0.139). Monoterpenic ester raw is explained by one top ranked model ( $R^2 = 0.265$ ), and

293 monoterpene ester on a biomass basis is also explained by one top ranked model ( $R^2 = 0.265$ ). Sesquiterpene raw is  
294 explained by seven top ranked models ( $R^2$  min = 0.040, max = 0.194, mean = 0.098), while sesquiterpene on a  
295 biomass basis is explained by two top ranked models ( $R^2$  min = 0.023, max = 0.242, mean = 0.132). Phytochemical  
296 diversity on a raw basis is supported by four top ranked models ( $R^2$  min = 0.017, max = 0.122, mean = 0.060).

297         At the species level (Fig. 4b), balsam fir and black spruce share some geographic commonalities in terms of  
298 top model covariates and coefficient relationships. For balsam fir, foliar terpene (raw) is explained by our EVI  
299 model and terpene on a biomass basis by our biotic and abiotic model. In comparison black spruce foliar terpene  
300 (raw) is explained by two competing top models of (1) EVI, biotic and abiotic, and (2) biotic and abiotic (model  
301 averaged predictive model shown in Fig. 5d). Three competing top models of (1) EVI and abiotic, (2) abiotic, and  
302 (3) EVI explain balsam fir foliar monoterpene (raw), while our biotic and abiotic model explain monoterpene on a  
303 biomass basis. In comparison, black spruce foliar monoterpene (raw) is explained by our biotic and abiotic model.  
304 Balsam fir foliar monoterpene alcohol (raw), although the null model is within  $\Delta AIC_c < 2$ , is explained by our land  
305 cover model, while black spruce foliar monoterpene alcohol is explained by our biotic and abiotic combination  
306 model. Balsam fir foliar monoterpene ester on a biomass basis is explained by our biotic and abiotic combination  
307 model. While black spruce foliar monoterpene ester (raw) is explained by our biotic and abiotic combination model.  
308 Balsam fir foliar sesquiterpene (raw) is explained by three competing top models of (1) EVI and abiotic, (2) EVI,  
309 and (3) abiotic. Balsam fir sesquiterpene on a biomass basis is explained by two competing top models of (1) EVI,  
310 and (2) biotic and abiotic, although the null model is within  $\Delta AIC_c < 2$ . In contrast, black spruce foliar sesquiterpene  
311 is explained by four competing top models of (1) land cover, EVI and abiotic, (2) abiotic, (3) biotic and abiotic, and  
312 (4) EVI and abiotic. Lastly, balsam fir foliar phytochemical diversity is explained by our abiotic model, although the  
313 null model is within  $\Delta AIC_c < 2$ , while black spruce foliar phytochemical diversity is explained by three competing  
314 top models of (1) land cover, (2) biotic, and (3) EVI.

315

#### 316         4. Discussion

317 Identifying spatial explicit drivers of foliar ESP traits may be a starting point to study ecosystem processes at the  
318 landscape extent. Our approach allows us to obtain spatially explicit estimates of heterogeneity through the  
319 development of foliar ESP trait distribution models (e.g., Fig. 5, Pickett and Cadenasso, 1995; Shen et al., 2011;

320 Turner, 1989). Foliar ESP traits are often useful indicators of primary productivity, community structure, nutrient  
321 cycling, and trophic interactions (Brauer et al., 2012; Hunter, 2016). Here, we use differing combinations of  
322 spatially explicit covariates: land cover, productivity (EVI), biotic (forest structure: age, height, canopy closure), and  
323 abiotic (elevation, aspect, slope) factors, to identify which combinations of these factors drive ESP traits for our  
324 focal species at the landscape extent. In addition, we compare trait drivers across species to determine if there are  
325 commonalities. We find that not all traits, across species, are driven by the same spatial covariates. Although many  
326 studies have demonstrated community level coordination of foliar traits (Callis-Duehl et al., 2017; Descombes et al.,  
327 2017; Fyllas et al., 2020; Jiang et al., 2016), our findings suggest that trait spatial patterns are largely species  
328 specific. Thus, pattern-to-process relationships act at the species level to create landscapes of plant trait spatial  
329 heterogeneity and provides us with a new lens to evaluate landscape function. For instance, the spatial co-location of  
330 foliar resource convergence and divergence likely influence where, how, and why herbivores make foraging trade-  
331 offs decision between multiple forage species (Balluffi-Fry et al., 2020; Haynes & Cronin, 2004; Hunter, 2016). By  
332 developing spatial distribution models for multiple species and their traits (see Fig. 5 for an example) these maps can  
333 aid us in identifying resource hot spots of ecosystem services (Bernhardt et al., 2017; Lavorel et al., 2011; McClain  
334 et al., 2003), which in turn can inform herbivore foraging and pollinator (Filipiak, 2018) strategies and trade-off  
335 decisions (Shepard et al. 2013; see also Appendix 20 Fig A6 for a spatial correlation matrix of observed versus  
336 predicted ESP surfaces).

337

#### 338 *4.1. Foliar percent elemental traits*

339 At the foliar percent elemental trait level, C, N, and P, we find mixed support for general patterns, as our results  
340 support species-specific spatial covariate trait relationships. For instance, abiotic covariates occurred more often as a  
341 top model, reinforcing a Humboltian perspective of plant distributions influence by soil and climate (Pausas &  
342 Bond, 2019). Other top ranked models, however, with biotic components, suggest that land cover type, site  
343 productivity, and forest structure have an influence on the spatial variability of foliar percent elemental traits. Across  
344 species, the EVI covariate did not occur in top ranked models for foliar percent carbon, although land cover, biotic  
345 and abiotic correlates did. Foliar percent C, N and P are often a useful measure of site level productivity, and EVI is  
346 a measure of productivity from space, however, a difference in scale here is likely why EVI is not a spatial driver of

347 these foliar traits. Our results suggest that land cover and biotic factors of forest structure, likely have more of an  
348 influence on these foliar traits at the landscape extent (Rijkers et al., 2000). However, we did find that different  
349 combinations of EVI, biotic, and abiotic correlates influence foliar percent P at the trait level; suggesting that land  
350 cover type may not regulate phosphorus pathways. The weathering of rocks and soil particles contribute to soil P  
351 availability (i.e., EVI as a proxy for productivity/soil fertility) and P acquisition and nutrient uplift likely depends on  
352 competitive interactions determined by community types (i.e., biotic factors), and soil and water movement that  
353 facilitate anion and cation exchanges from soils particles to roots (Smith et al., 2000).

354         At the species level, general drivers of foliar percent C, N, P composition are more evident. For example,  
355 our models of (1) abiotic and (2) land cover, biotic and abiotic were the top models for foliar percent carbon in red  
356 maple and balsam fir and for lowbush blueberry and black spruce, respectively. This may suggest that between  
357 species with differing life histories that operate on different ends of the leaf spectrum (i.e., long lived versus  
358 seasonal foliar material); similar spatial predictors influence foliar percent carbon. Moreover, red maple foliar  
359 percent N content showed specificity to deciduous land cover and open canopy conditions, which may suggest  
360 increased N use efficiency in areas where deciduous leaf litter feedbacks ameliorate microbial community associated  
361 with plant functional types (Hobbie, 2015). These patterns provide evidence that biotic interactions may have  
362 important consequences for intraspecific variability of plant traits. Not all correlates within top models were,  
363 however, significant drivers. Notably, elevation and slope were important for species foliar percent carbon,  
364 supported by models with abiotic correlates. Together elevation and slope often have an influence on soil nutrient  
365 retention due to drainage properties (Müller et al., 2017). In addition, age classes (a biotic correlate) was important  
366 for black spruce foliar percent carbon, thus as the dominant tree species in this area, optimal carbon sequestration  
367 potential may occur under black spruce canopy community types across various seral stages (Dunn et al., 2009). We  
368 failed to find evidence to support models for foliar percent N and P of white birch. White birch is a clonal species  
369 with ramets that connect neighbouring individuals and facilitate the sharing of elemental resources to enhance  
370 collective nutrient use efficiencies (Bittebiere et al., 2019; Cornelissen and Cornwell, 2014). Ramet nutrient sharing,  
371 coupled with high plasticity of intraspecific variability in foliar percent elemental traits likely explain why we failed  
372 to detect a spatial signal with our covariates for white birch (Pyakurel and Wang, 2014; Wam et al., 2018). Overall,  
373 on the landscape, different drivers of foliar resource quality (i.e., C, N, and P), result in spatially heterogeneous

374 species-specific resource hot spots. This may have far reaching implications for consumer dynamics and ecosystem  
375 processes (Haynes and Cronin, 2004; Wam et al., 2018).

376

#### 377 *4.2. Foliar quantity elemental traits*

378 We only found support for drivers of foliar quantity elemental traits for two out of our five study species; balsam fir  
379 and lowbush blueberry. In each case, a single but different model explained all foliar quantity elemental traits.  
380 Collectively, these covariate combinations suggest that community type along with the structural properties of  
381 community conditions and abiotic factors highly determine the amount of foliar quantity C, N, and P resources.  
382 Across the landscape, these spatial covariates allow us to map the distribution of foliar quantity C, N, and P to detect  
383 areas of plant performance (i.e., optimal growth), resource abundance, and biogeochemical hot spots associated with  
384 nutrient uplift and storage (McClain et al., 2003; Tang et al., 2018). In addition, foliar quantity C is often related to  
385 leaf dry matter content, where increased dry matter correlates with decreased leaf palatability (Adler et al., 2014)  
386 and as such is a suggested driver of herbivore foraging trade-offs between quantity and quality (Champagne et al.,  
387 2018; Wam et al., 2018). The lack of evidence, however, to support foliar quantity elemental traits in our other study  
388 species constrains our ability to form generalizations of species spatial patterns and the processes that drive them,  
389 and as such suggests that these traits are either driven by different covariates or that inference may be limited to  
390 smaller spatial extents (Smithwick et al., 2003).

391

#### 392 *4.3. Foliar stoichiometric traits*

393 Across species at the trait level, we have limited evidence to support generalizations of spatial foliar stoichiometric  
394 relationships. More notable are the foliar stoichiometric patterns that emerge at the species level. For instance, foliar  
395 C:P and N:P between balsam fir and red maple share similar predictors. However, for red maple, elevation and slope  
396 were determined to be key correlates, in comparison, aspect was a significant correlate for balsam fir. This suggests,  
397 that although these traits share similar predictors, the impact of these correlates differ, likely due to species and  
398 community level differences of nutrient co-limitation (Brauer et al., 2012). In contrast, lowbush blueberry and black  
399 spruce share a similar predictor for foliar N:P and similar responses to significant correlates of EVI, age class (i.e.,  
400 biotic factor), elevation, and slope. Here, although, lowbush blueberry and black spruce occupy different ecological



401 niches, they appear to respond to similar constraints of nutrient co-limitation, and thus may be nutrient limited under  
402 similar conditions. Similar to foliar percent and quantity elemental traits, we did not find evidence of a spatial  
403 covariate relationship for white birch foliar stoichiometric traits. Although communities are often spatially  
404 structured by nutrient co-limitation (Harpole et al., 2011), clonal strategies of ramet nutrient transfer may diminish  
405 these effects and as such constrain our ability to detect spatial predictors of foliar C:N, C:P, and N:P in white birch  
406 (Alpert, 1991; Li et al., 2004; Zhang and He, 2009). Collectively, this information is vital to informing resource hot  
407 spots, and mechanisms of nutrient co-limitation that structure biological communities (Gimona & van der Horst,  
408 2007; Harpole et al., 2011). For instance, foliar N:P range maps for balsam fir and red maple provide nutrient use  
409 efficiency contours from which we can make spatial comparisons of species interactions that scale to the community  
410 structure level and aid us in identifying multi-species foliar resource hot spots. Moreover, by describing the spatial  
411 patchiness of resources we can inform herbivore foraging decisions and begin to make novel spatially explicit  
412 predictions associated with movement and behavioural trade-offs (Balluffi-Fry et al., 2020; Leroux et al., 2017;  
413 Rizzuto et al., 2019).

414

#### 415 *4.4. Foliar phytochemical traits*

416 Across species, at the trait level we potentially have support to form generalization of geographic commonalities of  
417 foliar phytochemical traits. For all traits, except foliar sesquiterpene and phytochemical diversity, the biotic and  
418 abiotic model was determined to be an important spatial driver. This may suggest that structural properties of  
419 habitats (i.e., stand age, tree heights, and canopy conditions) and topographic conditions interact to determine foliar  
420 phytochemical traits. This is, to some extent expected, given that phytochemical traits are influenced by the spatial  
421 association of other species and their responses to the presence of herbivores (Champagne et al., 2018). On the  
422 island of Newfoundland, moose often forage on balsam fir and not black spruce (Gosse et al., 2011). Given the  
423 presented commonalities, consumption of balsam fir may elicit a non-consumptive phytochemical response in black  
424 spruce, thus further decreasing its potential palatability and aligning their foliar phytochemical composition  
425 (however, see Hussain et al., 2019).

426 At the species level, general patterns of foliar phytochemical trait correlates are less evident. Given the  
427 predominance of our phytochemical groups in both balsam fir and black spruce, we expected that similar spatial

428 covariates should yield similar results between species. Our results, however, suggest foliar phytochemical traits  
429 exhibit species specificity to many different correlates. For instance, balsam fir and black spruce foliar terpene had  
430 differing predictors and differing significant correlates. Although some similarities between these two species exist,  
431 they are for traits on a different basis. For example, balsam fir foliar monoterpene on a biomass basis and black  
432 spruce foliar monoterpene on raw basis shared predictors; however, their response to specific correlates differed. For  
433 balsam fir, EVI as a remotely sensed proxy for productivity correlates to foliar terpene and monoterpene traits,  
434 suggesting optimal nutrient conditions may invoke a strong defence position (Lindroth et al., 2002). However, there  
435 are potential confounding effects. Increased phytochemical production, in species with constituent strategies (i.e.,  
436 maintained baseline phytochemical production), may occur in response to the presence and or interaction of an  
437 herbivore (Kessler, 2015), which in turn influence top-down nutrient dynamics (Hunter, 2016) in positive or  
438 negative ways depending on the soil condition and litter feedbacks (Hemming & Lindroth, 1999; Hobbie, 2015). As  
439 well, when we relativized phytochemical variables on a biomass basis, for balsam fir, support for foliar terpene,  
440 monoterpene, and monoterpenic ester traits was explained by the same combination of spatial covariates; abiotic and  
441 biotic. In contrast, we had no evidence to support spatial relationships of black spruce foliar phytochemical traits on  
442 a biomass basis. More notably, between the two species, abiotic covariates appear to influence foliar sesquiterpene.  
443 Here, the intraspecific variability of phytochemical groups and measure of compound diversity are often used as a  
444 proxy to indicate plant-herbivore interactions, herbivore diversity, and trophic specialization (Richards et al., 2015).  
445 From our results, we find evidence to map phytochemical terpene groups and diversity, with some similarities in  
446 covariate specificity between two species with similar life histories. The spatial variability of foliar phytochemical  
447 composition provides us with a spatially explicit way to unravel the consequences and species interactions of  
448 herbivore foraging patterns with links to nutrient cycling processes (i.e., soil trampling, nutrient transfer, and  
449 changes in plant species composition Champagne et al., 2018; Gosse et al., 2011; Hunter, 2016).

450

#### 451 *4.5 Implications of ESP spatial trait distributions beyond the boreal*

452 Foliar ESP traits represent a common currency of species (Elser & Hamilton, 2007). These traits are often used as  
453 indicators for differing ecological conditions with consequences that reach across levels of biological organization  
454 (Fajardo & Siefert, 2018). For instance, global patterns of N and P are associated with latitudinal gradients, with

455 northern plants having higher concentrations of N and P related to plants at the equator (Reich & Oleksyn, 2004). By  
456 identifying the spatially explicit drivers of foliar N and P, we can map resource hot spots and compare how the  
457 distribution of these resources influence primary production (Smithwick et al., 2003), nutrient uplift (Jobbágy &  
458 Jackson, 2004), herbivore space use and forage selection (Duparc et al., 2020), and community assembly processes  
459 (Harpole et al., 2011; Jung et al., 2010) in different ecosystems. Moreover, we can begin evaluate the spatial flows  
460 of elements across the landscape (Shen et al., 2011). Indeed, many studies have identified spatial drivers of foliar  
461 ESP traits in differing ecosystems (see Table 1 for a non-exhaustive list of studies) however, a spatially explicit  
462 approach is needed to derive predictions from which we can map these resource distributions and obtain estimates of  
463 spatial heterogeneity.

464

## 465 **5. Conclusion**

466 By identifying spatially explicit covariates for foliar ESP traits at the species level, we can develop distribution  
467 models of intraspecific trait variability across a boreal landscape (for an example see Fig. 5). These distribution  
468 models, allow us to explore the consequences of trait spatial heterogeneity and the processes that drive them with  
469 implications for landscape functionality (Harvey et al., 2019). For example, we can test hypotheses about herbivore  
470 resource selection across scales (Balluffi-Fry et al., 2020), infer landscape functionality via pattern and process  
471 relationships (Turner, 1989), or explore how the spatial distribution of matter and energy feedbacks on landscape  
472 structure with implications for the management of biogeochemical processes (Lovell & Johnston, 2009; Shen et al.,  
473 2011). In addition, our work described here may be of use to carbon modelling approaches which largely focus on  
474 sequestration and storage, or Net Ecosystem Production (NEP), and overlook carbon dynamics at the interface of  
475 ecological interactions (Schmitz et al., 2018). Knowing how much carbon is sequestered, lost through respiration, or  
476 through pathways of non-photosynthetic carbon, foliar carbon reabsorption, and foliar carbon loss through  
477 consumptive activities allows for the refinement of carbon cycling models (Dirnböck et al., 2020). Given the  
478 importance of the circumboreal in carbon cycles, our work here can help understand how carbon dynamics may  
479 manifest in other parts of the boreal. Here, we investigated the drivers of foliar ESP traits for commonly occurring,  
480 geographically widespread boreal species using accessible spatial covariates. We found some geographic  
481 commonalities in spatial covariates at the trait and species level from which we can make generalities about

482 physiological links to ecosystem processes and landscape function (Hobbie, 2015; Li et al., 2004; McClain et al.,  
483 2003; Poorter and Bongers, 2006). There are specificities in spatial predictors at the species level that suggest plants  
484 respond differently to environmental conditions and that ideas of resources hot spots are likely species specific. How  
485 different species of plants respond in different parts of the world merits further work like this that combines  
486 landscape ecology, spatially modelling, and plant stoichiometry.

487

#### 488 **Funding**

489 This research was funded by the Government of Newfoundland and Labrador Centre for Forest Science and  
490 Innovation to YFW (Grant #221273), SJL (Grant #221274), and EVW (Grant #221275), Government of  
491 Newfoundland and Labrador Innovate NL Leverage R&D to EVW & SJL (Grant #5404.1884.102) and Ignite R&D  
492 to SJL (Grant #5404.1696.101) programs, Mitacs Accelerate Graduate Research Internship program to YW, EVW,  
493 & SJL (Grant #IT05904), the Canada Foundation for Innovation John R. Evans Leaders Fund to EVW & SJL (Grant  
494 #35973), and a Natural Science and Engineering Research Council Discovery Grant to YFW (Grant #RGPIN-2015-  
495 05799).

496

#### 497 **Conflicts of interest**

498 The authors have no conflicts of interest to declare that are relevant to the content of this article.

499 **Ethics approval** – n/a

500 **Consent to participate** – n/a

501 **Consent for publication** - there are no restrictions to publish

#### 502 **Availability of data and material**

503 The datasets and associated R code used to conduct research presented in this manuscript are available on  
504 Figshare.com at <https://doi.org/10.6084/m9.figshare.11911455.v1>. The Forest Resource Inventory datasets provided  
505 by the Provincial Government of Newfoundland and Labrador and the Federal Government of Canada may be made  
506 available upon request, however additional permission through these agencies may be required.

507 **Code availability** The R code used to conduct research presented in this manuscript are available on Figshare.com  
508 at <https://doi.org/10.6084/m9.figshare.11911455.v1>.

509

510 **Literature cited**

- 511 Adler, P. B., Salguero-Gomez, R., Compagnoni, A., Hsu, J. S., Ray-Mukherjee, J., Mbeau-Ache, C., & Franco, M.  
512 (2014). Functional traits explain variation in plant life history strategies. *Proceedings of the National*  
513 *Academy of Sciences*, *111*(2), 740–745. <https://doi.org/10.1073/pnas.1315179111>
- 514 Ågren, G. I. (1988). Ideal nutrient productivities and nutrient proportions in plant growth. *Plant, Cell &*  
515 *Environment*, *11*(7), 613–620.
- 516 Alpert, P. (1991). Nitrogen sharing among ramets increases clonal growth in *fragaria chiloensis*. *Ecology*, *72*(1), 69–  
517 80. <https://doi.org/10.2307/1938903>
- 518 Ashton, I. W., Miller, A. E., Bowman, W. D., & Suding, K. N. (2010). Niche complementarity due to plasticity in  
519 resource use: Plant partitioning of chemical N forms. *Ecology*, *91*(11), 3252–3260.  
520 <https://doi.org/10.1890/09-1849.1>
- 521 Balluffi-Fry, J., Leroux, S. J., Wiersma, Y. F., Heckford, T. R., Rizzuto, M., Richmond, I. C., & Wal, E. V. (2020).  
522 Quantity–quality trade-offs revealed using a multiscale test of herbivore resource selection on elemental  
523 landscapes. *Ecology and Evolution*, *n/a*(n/a). <https://doi.org/10.1002/ece3.6975>
- 524 Balzotti, C. S., Asner, G. P., Taylor, P. G., Cleveland, C. C., Cole, R., Martin, R. E., Nasto, M., Osborne, B. B.,  
525 Porder, S., & Townsend, A. R. (2016). Environmental controls on canopy foliar nitrogen distributions in a  
526 Neotropical lowland forest. *Ecological Applications*, *26*(8), 2451–2464. <https://doi.org/10.1002/eap.1408>
- 527 Barron-Gafford, G. A., Scott, R. L., Jenerette, G. D., Hamerlynck, E. P., & Huxman, T. E. (2012). Temperature and  
528 precipitation controls over leaf- and ecosystem-level CO<sub>2</sub> flux along a woody plant encroachment gradient.  
529 *Global Change Biology*, *18*(4), 1389–1400. <https://doi.org/10.1111/j.1365-2486.2011.02599.x>
- 530 Becknell, J., M., & Powers, J., S. (2014). Stand age and soils as drivers of plant functional traits and aboveground  
531 biomass in secondary tropical dry forest. *Canadian Journal of Forest Research*.  
532 <https://doi.org/10.1139/cjfr-2013-0331>
- 533 Bernhardt, E. S., Blaszcak, J. R., Ficken, C. D., Fork, M. L., Kaiser, K. E., & Seybold, E. C. (2017). Control points  
534 in ecosystems: Moving beyond the hot spot hot moment concept. *Ecosystems*, *20*(4), 665–682.  
535 <https://doi.org/10.1007/s10021-016-0103-y>

- 536 Bittebiere, A.-K., Saiz, H., & Mony, C. (2019). New insights from multidimensional trait space responses to  
537 competition in two clonal plant species. *Functional Ecology*, 297–307. [https://doi.org/10.1111/1365-](https://doi.org/10.1111/1365-2435.13220)  
538 2435.13220
- 539 Blanes, M. C., Viñeola, B., Merino, J., & Carreira, J. A. (2013). Nutritional status of *Abies pinsapo* forests along a  
540 nitrogen deposition gradient: Do C/N/P stoichiometric shifts modify photosynthetic nutrient use efficiency?  
541 *Oecologia*, 171(4), 797–808. <https://doi.org/10.1007/s00442-012-2454-1>
- 542 Booker, F. L., & Maier, C. A. (2001). Atmospheric carbon dioxide, irrigation, and fertilization effects on phenolic  
543 and nitrogen concentrations in loblolly pine (*Pinus taeda*) needles. *Tree Physiology*, 21(9), 609–616.  
544 <https://doi.org/10.1093/treephys/21.9.609>
- 545 Brauer, V. S., Stomp, M., & Huisman, J. (2012). The nutrient-load hypothesis: Patterns of resource limitation and  
546 community structure driven by competition for nutrients and light. *The American Naturalist*, 179(6), 721–  
547 740. <https://doi.org/10.1086/665650>
- 548 Bryant, J. P., Chapin, F. S., & Klein, D. R. (1983). Carbon/nutrient balance of boreal plants in relation to vertebrate  
549 herbivory. *Oikos*, 40(3), 357. <https://doi.org/10.2307/3544308>
- 550 Burnham, K. P., & Anderson, D. R. (2002). *Model selection and multimodel inference: A practical information-*  
551 *theoretic approach*. Springer-Verlag.
- 552 Cachet, T., Brevard, H., Chaintreau, A., Demyttenaere, J., French, L., Gassenmeier, K., Joulain, D., Koenig, T.,  
553 Leijts, H., Liddle, P., Loesing, G., Marchant, M., Merle, Ph., Saito, K., Schippa, C., Sekiya, F., & Smith, T.  
554 (2016). IOFI recommended practice for the use of predicted relative-response factors for the rapid  
555 quantification of volatile flavouring compounds by GC-FID. *Flavour and Fragrance Journal*, 31(3), 191–  
556 194. <https://doi.org/10.1002/ffj.3311>
- 557 Callis-Duehl, K., Vittoz, P., Defosse, E., & Rasmann, S. (2017). Community-level relaxation of plant defenses  
558 against herbivores at high elevation. *Plant Ecology*, 218(3), 291–304. [https://doi.org/10.1007/s11258-016-](https://doi.org/10.1007/s11258-016-0688-4)  
559 0688-4
- 560 *Canadian Digital Elevation Model: Product Specifications-Edition 1.1*. (2016). [Map]. Natural Resources Canada.

- 561 Champagne, E., Moore, B. D., Côté, S. D., & Tremblay, J.-P. (2018). Spatial correlations between browsing on  
562 balsam fir by white-tailed deer and the nutritional value of neighboring winter forage. *Ecology and*  
563 *Evolution*, 8(5), 2812–2823. <https://doi.org/10.1002/ece3.3878>
- 564 Cornelissen, J. H. C., & Cornwell, W. K. (2014). The Tree of Life in ecosystems: Evolution of plant effects on  
565 carbon and nutrient cycling. *Journal of Ecology*, 102(2), 269–274. [https://doi.org/10.1111/1365-](https://doi.org/10.1111/1365-2745.12217)  
566 2745.12217
- 567 Couture, J. J., Holeski, L. M., & Lindroth, R. L. (2014). Long-term exposure to elevated CO<sub>2</sub> and O<sub>3</sub> alters aspen  
568 foliar chemistry across developmental stages. *Plant, Cell & Environment*, 37(3), 758–765.  
569 <https://doi.org/10.1111/pce.12195>
- 570 Descombes, P., Marchon, J., Pradervand, J.-N., Bilat, J., Guisan, A., Rasmann, S., & Pellissier, L. (2017).  
571 Community-level plant palatability increases with elevation as insect herbivore abundance declines.  
572 *Journal of Ecology*, 105(1), 142–151. <https://doi.org/10.1111/1365-2745.12664>
- 573 Diaz, S., Hodgson, J. g., Thompson, K., Cabido, M., Cornelissen, J. h. c., Jalili, A., Montserrat-Martí, G., Grime, J.  
574 p., Zarrinkamar, F., Asri, Y., Band, S. r., Basconcelo, S., Castro-Díez, P., Funes, G., Hamzehee, B.,  
575 Khoshnevi, M., Pérez-Harguindeguy, N., Pérez-Rontomé, M. c., Shirvany, F. a., ... Zak, M. r. (2004). The  
576 plant traits that drive ecosystems: Evidence from three continents. *Journal of Vegetation Science*, 15(3),  
577 295–304. <https://doi.org/10.1111/j.1654-1103.2004.tb02266.x>
- 578 Dirnböck, T., Kraus, D., Grote, R., Klatt, S., Kobler, J., Schindlbacher, A., Seidl, R., Thom, D., & Kiese, R. (2020).  
579 Substantial understory contribution to the C sink of a European temperate mountain forest landscape.  
580 *Landscape Ecology*, 35(2), 483–499. <https://doi.org/10.1007/s10980-019-00960-2>
- 581 Dunn, A. L., Wofsy, S. C., & Bright, A. V. H. (2009). Landscape heterogeneity, soil climate, and carbon exchange  
582 in a boreal black spruce forest. *Ecological Applications*, 19(2), 495–504. <https://doi.org/10.1890/07-0771.1>
- 583 Duparc, A., Garel, M., Marchand, P., Dubray, D., Maillard, D., & Loison, A. (2020). Through the taste buds of a  
584 large herbivore: Foodscape modeling contributes to an understanding of forage selection processes. *Oikos*,  
585 129(2), 170–183. <https://doi.org/10.1111/oik.06386>
- 586 Ecological Stratification Working Group. (1996). *A national ecological framework for Canada*. Centre for Land and  
587 Biological Resources Research, Research Branch, Agriculture and Agri-Food Canada.

- 588 Elser, J. J., Fagan, W. F., Kerkhoff, A. J., Swenson, N. G., & Enquist, B. J. (2010). Biological stoichiometry of plant  
589 production: Metabolism, scaling and ecological response to global change: Tansley review. *New*  
590 *Phytologist*, 186(3), 593–608. <https://doi.org/10.1111/j.1469-8137.2010.03214.x>
- 591 Elser, James J., & Hamilton, A. (2007). Stoichiometry and the new biology: The future is now. *PLoS Biology*, 5(7),  
592 e181. <https://doi.org/10.1371/journal.pbio.0050181>
- 593 Esri (10.8). (2020). [Computer software]. <https://www.esri.com/en-us/arcgis/products/arcgis-pro/>
- 594 Evans, J. (2020). *spatialEco. R package* (1.3-3) [Computer software]. <https://github.com/jeffrejevans/spatialEco>
- 595 Fajardo, A., & Siefert, A. (2018). Intraspecific trait variation and the leaf economics spectrum across resource  
596 gradients and levels of organization. *Ecology*, 99(5), 1024–1030. <https://doi.org/10.1002/ecy.2194>
- 597 Fan, H., Wu, J., Liu, W., Yuan, Y., Hu, L., & Cai, Q. (2015). Linkages of plant and soil C:N:P stoichiometry and  
598 their relationships to forest growth in subtropical plantations. *Plant and Soil*, 392(1–2), 127–138.  
599 <https://doi.org/10.1007/s11104-015-2444-2>
- 600 Filipiak, M. (2018). A better understanding of bee nutritional ecology is needed to optimize conservation strategies  
601 for wild bees—The application of ecological stoichiometry. *Insects*, 9(3).  
602 <https://doi.org/10.3390/insects9030085>
- 603 Forkner, R. E., & Marquis, R. J. (2004). Uneven-aged and even-aged logging alter foliar phenolics of oak trees  
604 remaining in forested habitat matrix. *Forest Ecology and Management*, 199(1), 21–37.  
605 <https://doi.org/10.1016/j.foreco.2004.03.044>
- 606 Fyllas, N. M., Michelaki, C., Galanidis, A., Evangelou, E., Zaragoza-Castells, J., Dimitrakopoulos, P. G., Tsadilas,  
607 C., Arianoutsou, M., & Lloyd, J. (2020). Functional trait variation among and within species and plant  
608 functional types in mountainous mediterranean forests. *Frontiers in Plant Science*, 11.  
609 <https://doi.org/10.3389/fpls.2020.00212>
- 610 Gartner, T. B., & Cardon, Z. G. (2004). Decomposition dynamics in mixed-species leaf litter. *Oikos*, 104(2), 230–  
611 246. JSTOR.
- 612 Gimona, A., & van der Horst, D. (2007). Mapping hotspots of multiple landscape functions: A case study on  
613 farmland afforestation in Scotland. *Landscape Ecology*, 22(8), 1255–1264. [https://doi.org/10.1007/s10980-](https://doi.org/10.1007/s10980-007-9105-7)  
614 [007-9105-7](https://doi.org/10.1007/s10980-007-9105-7)



- 615 Glassmire, A. E., Jeffrey, C. S., Forister, M. L., Parchman, T. L., Nice, C. C., Jahner, J. P., Wilson, J. S., Walla, T.  
616 R., Richards, L. A., Smilanich, A. M., Leonard, M. D., Morrison, C. R., Simbaña, W., Salagaje, L. A.,  
617 Dodson, C. D., Miller, J. S., Tepe, E. J., Villamarin-Cortez, S., & Dyer, L. A. (2016). Intraspecific  
618 phytochemical variation shapes community and population structure for specialist caterpillars. *New*  
619 *Phytologist*, 212(1), 208–219. <https://doi.org/10.1111/nph.14038>
- 620 Gosse, J., Hermanutz, L., McLaren, B., Deering, P., & Knight, T. (2011). Degradation of boreal forests by nonnative  
621 herbivores in Newfoundland’s National Parks: Recommendations for ecosystem restoration. *Natural Areas*  
622 *Journal*, 31(4), 331–339. <https://doi.org/10.3375/043.031.0403>
- 623 Grime, P. J., & Pierce, S. (2012). *The evolutionary strategies that shape ecosystems*. Wiley-Blackwell.
- 624 Hallett, R. A., & Hornbeck, J. W. (1997). Foliar and soil nutrient relationships in red oak and white pine forests.  
625 *Canadian Journal of Forest Research*, 27, 12.
- 626 Harpole, W. S., Ngai, J. T., Cleland, E. E., Seabloom, E. W., Borer, E. T., Bracken, M. E. S., Elser, J. J., Gruner, D.  
627 S., Hillebrand, H., Shurin, J. B., & Smith, J. E. (2011). Nutrient co-limitation of primary producer  
628 communities. *Ecology Letters*, 14(9), 852–862. <https://doi.org/10.1111/j.1461-0248.2011.01651.x>
- 629 Harvey, E., Gounand, I., Fronhofer, E. A., & Altermatt, F. (2019). Metaecosystem dynamics drive community  
630 composition in experimental, multi-layered spatial networks. *Oikos*. <https://doi.org/10.1111/oik.07037>
- 631 Harvey, E., Gounand, I., Ward, C. L., & Altermatt, F. (2017). Bridging ecology and conservation: From ecological  
632 networks to ecosystem function. *Journal of Applied Ecology*, 54(2), 371–379. [https://doi.org/10.1111/1365-](https://doi.org/10.1111/1365-2664.12769)  
633 [2664.12769](https://doi.org/10.1111/1365-2664.12769)
- 634 Hassell, M. P., Comins, H. N., & May, R. M. (1994). Species coexistence and self-organizing spatial dynamics.  
635 *Nature*, 370, 290–292.
- 636 Haynes, K. J., & Cronin, J. T. (2004). Confounding of patch quality and matrix effects in herbivore movement  
637 studies. *Landscape Ecology*, 19(2), 119–124. <https://doi.org/10.1023/B:LAND.0000021721.41349.85>
- 638 He, P., Fontana, S., Sardans, J., Peñuelas, J., Gessler, A., Schaub, M., Rigling, A., Li, H., Jiang, Y., & Li, M.-H.  
639 (2019). The biogeochemical niche shifts of *Pinus sylvestris* var. *Mongolica* along an environmental  
640 gradient. *Environmental and Experimental Botany*, 167, 103825.  
641 <https://doi.org/10.1016/j.envexpbot.2019.103825>

- 642 Hemming, J. D. C., & Lindroth, R. L. (1999). Effects of light and nutrient availability on aspen: Growth,  
643 phytochemistry, and insect performance. *Journal of Chemical Ecology*, 25(7), 1687–1714.  
644 <https://doi.org/10.1023/A:1020805420160>
- 645 Hessen, D. O., Ågren, G. I., Anderson, T. R., Elser, J. J., & de Ruiter, P. C. (2004). Carbon sequestration in  
646 ecosystems: The role of stoichiometry. *Ecology*, 85(5), 1179–1192. <https://doi.org/10.1890/02-0251>
- 647 Hijmans, R., J. (2020). *Raster: Geographic Data Analysis and Modeling. R package (3.4-5)* [Computer software].
- 648 Hobbie, S. E. (2015). Plant species effects on nutrient cycling: Revisiting litter feedbacks. *Trends in Ecology &*  
649 *Evolution*, 30(6), 357–363. <https://doi.org/10.1016/j.tree.2015.03.015>
- 650 Hunter, M. D. (2016). *The Phytochemical Landscape: Linking Trophic Interactions and Nutrient Dynamics*.  
651 Princeton University Press.
- 652 Hunter, M. D., & Schultz, J. C. (1995). Fertilization mitigates chemical induction and herbivore responses within  
653 damaged oak trees. *Ecology*, 76(4), 1226–1232. <https://doi.org/10.2307/1940929>
- 654 Hussain, A., Rodriguez-Ramos, J. C., & Erbilgin, N. (2019). Spatial characteristics of volatile communication in  
655 lodgepole pine trees: Evidence of kin recognition and intra-species support. *Science of The Total*  
656 *Environment*, 692, 127–135. <https://doi.org/10.1016/j.scitotenv.2019.07.211>
- 657 Jiang, Yong, Zang, R., Lu, X., Huang, Y., Ding, Y., Liu, W., Long, W., Zhang, J., & Zhang, Z. (2015). Effects of  
658 soil and microclimatic conditions on the community-level plant functional traits across different tropical  
659 forest types. *Plant and Soil*, 390(1), 351–367. <https://doi.org/10.1007/s11104-015-2411-y>
- 660 Jiang, Yueyang, Rocha, A. V., Rastetter, E. B., Shaver, G. R., Mishra, U., Zhuang, Q., & Kwiatkowski, B. L.  
661 (2016). C–N–P interactions control climate driven changes in regional patterns of C storage on the North  
662 Slope of Alaska. *Landscape Ecology*, 31(1), 195–213. <https://doi.org/10.1007/s10980-015-0266-5>
- 663 Jobbágy, E. G., & Jackson, R. B. (2004). The uplift of soil nutrients by plants: Biogeochemical consequences across  
664 scales. *Ecology*, 85(9), 2380–2389. <https://doi.org/10.1890/03-0245>
- 665 Jones, J. W., Starbuck, M. J., & Jenkerson, C. B. (2013). *Landsat surface reflectance quality assurance extraction*  
666 *(version 1.7): U.S. Geological Survey Techniques and Methods*. <https://pubs.usgs.gov/tm/11/c07>

- 667 Jung, V., Violle, C., Mondy, C., Hoffmann, L., & Muller, S. (2010). Intraspecific variability and trait-based  
668 community assembly. *Journal of Ecology*, 98(5), 1134–1140. [https://doi.org/10.1111/j.1365-](https://doi.org/10.1111/j.1365-2745.2010.01687.x)  
669 [2745.2010.01687.x](https://doi.org/10.1111/j.1365-2745.2010.01687.x)
- 670 Kerkhoff, A. J., Enquist, B. J., Elser, J. J., & Fagan, W. F. (2005). Plant allometry, stoichiometry and the  
671 temperature-dependence of primary productivity. *Global Ecology and Biogeography*, 14(6), 585–598.  
672 <https://doi.org/10.1111/j.1466-822X.2005.00187.x>
- 673 Kessler, A. (2015). The information landscape of plant constitutive and induced secondary metabolite production.  
674 *Current Opinion in Insect Science*, 8, 47–53. <https://doi.org/10.1016/j.cois.2015.02.002>
- 675 Kichenin, E., Wardle, D. A., Peltzer, D. A., Morse, C. W., & Freschet, G. T. (2013). Contrasting effects of plant  
676 inter- and intraspecific variation on community-level trait measures along an environmental gradient.  
677 *Functional Ecology*, 27(5), 1254–1261. <https://doi.org/10.1111/1365-2435.12116>
- 678 Knops, J. M. H., Bradley, K. L., & Wedin, D. A. (2002). Mechanisms of plant species impacts on ecosystem  
679 nitrogen cycling. *Ecology Letters*, 5(3), 454–466. <https://doi.org/10.1046/j.1461-0248.2002.00332.x>
- 680 Krishna, M. P., & Mohan, M. (2017). Litter decomposition in forest ecosystems: A review. *Energy, Ecology and*  
681 *Environment*, 2(4), 236–249. <https://doi.org/10.1007/s40974-017-0064-9>
- 682 *Land cover map of North American at 30 m resolution* (1st ed.). (2017). [Map]. Commission for Environmental  
683 Cooperation.
- 684 Lavorel, S., Grigulis, K., Lamarque, P., Colace, M.-P., Garden, D., Girel, J., Pellet, G., & Douzet, R. (2011). Using  
685 plant functional traits to understand the landscape distribution of multiple ecosystem services. *Journal of*  
686 *Ecology*, 99(1), 135–147. <https://doi.org/10.1111/j.1365-2745.2010.01753.x>
- 687 Leroux, S. J. (2019). On the prevalence of uninformative parameters in statistical models applying model selection  
688 in applied ecology. *PLoS ONE*, 14(2), 12. <https://doi.org/10.1371/journal.pone.0206711>
- 689 Leroux, S. J., Wal, E. V., Wiersma, Y. F., Charron, L., Ebel, J. D., Ellis, N. M., Hart, C., Kissler, E., Saunders, P.  
690 W., Moudrá, L., Tanner, A. L., & Yalcin, S. (2017). Stoichiometric distribution models: Ecological  
691 stoichiometry at the landscape extent. *Ecology Letters*, 20(12), 1495–1506.  
692 <https://doi.org/10.1111/ele.12859>

- 693 Li, B., Shibuya, T., Yogo, Y., & Hara, T. (2004). Effects of ramet clipping and nutrient availability on growth and  
694 biomass allocation of yellow nutsedge. *Ecological Research*, *19*(6), 603–612.  
695 <https://doi.org/10.1111/j.1440-1703.2004.00685.x>
- 696 Lindroth, R. L., Osier, T. L., Barnhill, H. R. H., & Wood, S. A. (2002). Effects of genotype and nutrient availability  
697 on phytochemistry of trembling aspen (*Populus tremuloides* Michx.) during leaf senescence. *Biochemical*  
698 *Systematics and Ecology*, *30*(4), 297–307. [https://doi.org/10.1016/S0305-1978\(01\)00088-6](https://doi.org/10.1016/S0305-1978(01)00088-6)
- 699 Liu, S., Yan, Z., Chen, Y., Zhang, M., Chen, J., & Han, W. (2019). Foliar pH, an emerging plant functional trait:  
700 Biogeography and variability across northern China. *Global Ecology and Biogeography*, *28*(3), 386–397.  
701 <https://doi.org/10.1111/geb.12860>
- 702 Lohbeck, M., Poorter, L., Lebrija-Trejos, E., Martínez-Ramos, M., Meave, J. A., Paz, H., Pérez-García, E. A.,  
703 Romero-Pérez, I. E., Tauro, A., & Bongers, F. (2013). Successional changes in functional composition  
704 contrast for dry and wet tropical forest. *Ecology*, *94*(6), 1211–1216. <https://doi.org/10.1890/12-1850.1>
- 705 Lovell, S. T., & Johnston, D. M. (2009). Designing landscapes for performance based on emerging principles in  
706 landscape ecology. *Ecology and Society*, *14*(1). <https://www.jstor.org/stable/26268059>
- 707 Macek, M., Kopecký, M., & Wild, J. (2019). Maximum air temperature controlled by landscape topography affects  
708 plant species composition in temperate forests. *Landscape Ecology*, *34*(11), 2541–2556.  
709 <https://doi.org/10.1007/s10980-019-00903-x>
- 710 McClain, M. E., Boyer, E. W., Dent, C. L., Gergel, S. E., Grimm, N. B., Groffman, P. M., Hart, S. C., Harvey, J. W.,  
711 Johnston, C. A., Mayorga, E., McDowell, W. H., & Pinay, G. (2003). Biogeochemical hot spots and hot  
712 moments at the interface of terrestrial and aquatic ecosystems. *Ecosystems*, *6*(4), 301–312.  
713 <https://doi.org/10.1007/s10021-003-0161-9>
- 714 Mendez, M., & Karlsson, S. P. (2005). Nutrient stoichiometry in *pinguicula vulgaris*: Nutrient availability, plant  
715 size, and reproductive status. *Ecology*, *86*(4), 982–991.
- 716 Morquecho-Contreras, A., Zepeda-Gómez, C., & Sánchez-Sánchez, H. (2018). Plant antiherbivore defense in  
717 diverse environments. In L. Hufnagel (Ed.), *Pure and Applied Biogeography*. InTech.  
718 <https://doi.org/10.5772/intechopen.70418>

- 719 Müller, M., Oelmann, Y., Schickhoff, U., Böhner, J., & Scholten, T. (2017). Himalayan treeline soil and foliar  
720 C:N:P stoichiometry indicate nutrient shortage with elevation. *Geoderma*, 291, 21–32.  
721 <https://doi.org/10.1016/j.geoderma.2016.12.015>
- 722 Muraoka, H., Noda, H. M., Nagai, S., Motohka, T., Saitoh, T. M., Nasahara, K. N., & Saigusa, N. (2013). Spectral  
723 vegetation indices as the indicator of canopy photosynthetic productivity in a deciduous broadleaf forest.  
724 *Journal of Plant Ecology*, 6(5), 393–407. <https://doi.org/10.1093/jpe/rts037>
- 725 Niinemets, Ü., & Kull, O. (1998). Stoichiometry of foliar carbon constituents varies along light gradients in  
726 temperate woody canopies: Implications for foliage morphological plasticity. *Tree Physiology*, 18(7), 467–  
727 479. <https://doi.org/10.1093/treephys/18.7.467>
- 728 Pan, Y., Horn, J., Jenkins, J., & Birdsey, R. (2004). Importance of foliar nitrogen concentration to predict forest  
729 productivity in the mid-Atlantic region. *Forest Science*, 50(3), 11.
- 730 Pausas, J. G., & Bond, W. J. (2019). Humboldt and the reinvention of nature. *Journal of Ecology*, 107(3), 1031–  
731 1037. <https://doi.org/10.1111/1365-2745.13109>
- 732 Pellissier, L., Moreira, X., Danner, H., Serrano, M., Salamin, N., van Dam, N. M., & Rasmann, S. (2016). The  
733 simultaneous inducibility of phytochemicals related to plant direct and indirect defences against herbivores  
734 is stronger at low elevation. *Journal of Ecology*, 104(4), 1116–1125. [https://doi.org/10.1111/1365-](https://doi.org/10.1111/1365-2745.12580)  
735 [2745.12580](https://doi.org/10.1111/1365-2745.12580)
- 736 Philben, M., Ziegler, S. E., Edwards, K. A., Kahler, R., & Benner, R. (2016). Soil organic nitrogen cycling increases  
737 with temperature and precipitation along a boreal forest latitudinal transect. *Biogeochemistry*, 127(2–3),  
738 397–410. <https://doi.org/10.1007/s10533-016-0187-7>
- 739 Pickett, S. T. A., & Cadenasso, M. L. (1995). Landscape ecology: Spatial heterogeneity in ecological systems.  
740 *Science*, 269(5222), 331–334. <https://doi.org/10.1126/science.269.5222.331>
- 741 Poitevin, E. (2016). Official methods for the determination of minerals and trace elements in infant formula and  
742 milk products: A review. *Journal of AOAC International*, 99(1), 42–52. [https://doi.org/10.5740/jaoacint.15-](https://doi.org/10.5740/jaoacint.15-0246)  
743 [0246](https://doi.org/10.5740/jaoacint.15-0246)

- 744 Ponette-González, A. G., Weathers, K. C., & Curran, L. M. (2010). Tropical land-cover change alters  
745 biogeochemical inputs to ecosystems in a Mexican montane landscape. *Ecological Applications*, *20*(7),  
746 1820–1837. <https://doi.org/10.1890/09-1125.1>
- 747 Poorter, L., & Bongers, F. (2006). Leaf traits are good predictors of plant performance across 53 rain forest species.  
748 *Ecology*, *87*(7), 1733–1743. [https://doi.org/10.1890/0012-9658\(2006\)87\[1733:LTAGPO\]2.0.CO;2](https://doi.org/10.1890/0012-9658(2006)87[1733:LTAGPO]2.0.CO;2)
- 749 Pyakurel, A., & Wang, J. R. (2014). Leaf morphological and stomatal variations in paper birch populations along  
750 environmental gradients in Canada. *American Journal of Plant Sciences*, *05*(11), 1508–1520.  
751 <https://doi.org/10.4236/ajps.2014.511166>
- 752 R Core Team. (2020). *R: a language and environment for statistical computing*. R Foundation for Statistical  
753 Computing. <https://www.R-project.org/>
- 754 Radwan, M. A., & Harrington, C. A. (2011). Foliar chemical concentrations, growth, and site productivity relations  
755 in western red cedar. *Canadian Journal of Forest Research*. <https://doi.org/10.1139/x86-185>
- 756 Reich, P. B., & Oleksyn, J. (2004). Global patterns of plant leaf N and P in relation to temperature and latitude.  
757 *Proceedings of the National Academy of Sciences*, *101*(30), 11001–11006.  
758 <https://doi.org/10.1073/pnas.0403588101>
- 759 Requena-Mullor, J. M., López, E., Castro, A. J., Alcaraz-Segura, D., Castro, H., Reyes, A., & Cabello, J. (2017).  
760 Remote-sensing based approach to forecast habitat quality under climate change scenarios. *PLOS ONE*,  
761 *12*(3), e0172107. <https://doi.org/10.1371/journal.pone.0172107>
- 762 Richards, L. A., Dyer, L. A., Forister, M. L., Smilanich, A. M., Dodson, C. D., Leonard, M. D., & Jeffrey, C. S.  
763 (2015). Phytochemical diversity drives plant–insect community diversity. *Proceedings of the National*  
764 *Academy of Sciences of the United States of America*, *112*(35), 10973–10978.  
765 <https://doi.org/10.1073/pnas.1504977112>
- 766 Richardson, A. D. (2004). Foliar chemistry of balsam fir and red spruce in relation to elevation and the canopy light  
767 gradient in the mountains of the northeastern United States. *Plant and Soil*, *260*(1), 291–299.  
768 <https://doi.org/10.1023/B:PLSO.0000030179.02819.85>

- 769 Rijkers, T., Pons, T. L., & Bongers, F. (2000). The effect of tree height and light availability on photosynthetic leaf  
770 traits of four neotropical species differing in shade tolerance. *Functional Ecology*, 14(1), 77–86.  
771 <https://doi.org/10.1046/j.1365-2435.2000.00395.x>
- 772 Rizzuto, M., Leroux, S. J., Wal, E. V., Wiersma, Y. F., Heckford, T. R., & Balluffi-Fry, J. (2019). Patterns and  
773 potential drivers of intraspecific variability in the body C, N, and P composition of a terrestrial consumer,  
774 the snowshoe hare (*Lepus americanus*). *Ecology and Evolution*, 9(24), 14453–14464.  
775 <https://doi.org/10.1002/ece3.5880>
- 776 Santiago, L. S., Kitajima, K., Wright, S. J., & Mulkey, S. S. (2004). Coordinated changes in photosynthesis, water  
777 relations and leaf nutritional traits of canopy trees along a precipitation gradient in lowland tropical forest.  
778 *Oecologia*, 139(4), 495–502. <https://doi.org/10.1007/s00442-004-1542-2>
- 779 Sardans, J., Alonso, R., Carnicer, J., Fernández-Martínez, M., Vivanco, M. G., & Peñuelas, J. (2016). Factors  
780 influencing the foliar elemental composition and stoichiometry in forest trees in Spain. *Perspectives in*  
781 *Plant Ecology, Evolution and Systematics*, 18, 52–69. <https://doi.org/10.1016/j.ppees.2016.01.001>
- 782 Sardans, Jordi, Alonso, R., Janssens, I. A., Carnicer, J., Vereseglou, S., Rillig, M. C., Fernández-Martínez, M.,  
783 Sanders, T. G. M., & Peñuelas, J. (2016). Foliar and soil concentrations and stoichiometry of nitrogen and  
784 phosphorous across European *Pinus sylvestris* forests: Relationships with climate, N deposition and tree  
785 growth. *Functional Ecology*, 30(5), 676–689. <https://doi.org/10.1111/1365-2435.12541>
- 786 Schmitz, O. J., Wilmers, C. C., Leroux, S. J., Doughty, C. E., Atwood, T. B., Galetti, M., Davies, A. B., & Goetz, S.  
787 J. (2018). Animals and the zoogeochemistry of the carbon cycle. *Science*, 362(6419), eaar3213.  
788 <https://doi.org/10.1126/science.aar3213>
- 789 Sedio, B. E., Echeverri, J. C. R., P, C. A. B., & Wright, S. J. (2017). Sources of variation in foliar secondary  
790 chemistry in a tropical forest tree community. *Ecology*, 98(3), 616–623. <https://doi.org/10.1002/ecy.1689>
- 791 Shen, W., Lin, Y., Jenerette, G. D., & Wu, J. (2011). Blowing litter across a landscape: Effects on ecosystem  
792 nutrient flux and implications for landscape management. *Landscape Ecology*, 26(5), 629–644.  
793 <https://doi.org/10.1007/s10980-011-9599-x>

- 794 Shepard, E. L. C., Wilson, R. P., Rees, W. G., Grundy, E., Lambertucci, S. A., & Vosper, S. B. (2013). Energy  
795 landscapes shape animal movement ecology. *The American Naturalist*, *182*(3), 298–312.  
796 <https://doi.org/10.1086/671257>
- 797 Shure, D. J., & Wilson, L. A. (1993). Patch-size effects on plant phenolics in successional openings of the southern  
798 appalachians. *Ecology*, *74*(1), 55–67. <https://doi.org/10.2307/1939501>
- 799 Smith, C. K., Coyea, M. R., & Munson, A. D. (2000). Soil carbon, nitrogen, and phosphorus stocks and dynamics  
800 under disturbed black spruce forests. *Ecological Applications*, *10*(3), 775–788.  
801 [https://doi.org/10.1890/1051-0761\(2000\)010\[0775:SCNAPS\]2.0.CO;2](https://doi.org/10.1890/1051-0761(2000)010[0775:SCNAPS]2.0.CO;2)
- 802 Smithwick, E. A. H., Harmon, M. E., & Domingo, J. B. (2003). Modeling multiscale effects of light limitations and  
803 edge-induced mortality on carbon stores in forest landscapes. *Landscape Ecology*, *18*(7), 701–721.  
804 <https://doi.org/10.1023/B:LAND.0000004254.94982.67>
- 805 South, R. G. (1983). *Biogeography and ecology of the island of Newfoundland* (Vol. 48).
- 806 Strahan, R. T., Meador, A. J. S., Huffman, D. W., & Laughlin, D. C. (2016). Shifts in community-level traits and  
807 functional diversity in a mixed conifer forest: A legacy of land-use change. *Journal of Applied Ecology*,  
808 *53*(6), 1755–1765. <https://doi.org/10.1111/1365-2664.12737>
- 809 Tang, Z., Xu, W., Zhou, G., Bai, Y., Li, J., Tang, X., Chen, D., Liu, Q., Ma, W., Xiong, G., He, H., He, N., Guo, Y.,  
810 Guo, Q., Zhu, J., Han, W., Hu, H., Fang, J., & Xie, Z. (2018). Patterns of plant carbon, nitrogen, and  
811 phosphorus concentration in relation to productivity in China’s terrestrial ecosystems. *Proceedings of the*  
812 *National Academy of Sciences*, *115*(16), 4033–4038. <https://doi.org/10.1073/pnas.1700295114>
- 813 Turner, Monica G. (1989). Landscape ecology: The effect of pattern on process. *Landscape Ecology*, *20*, 171–197.
- 814 Turner, Monica Goigel. (2005). Landscape ecology: What is the state of the science? *Annual Review of Ecology,*  
815 *Evolution, and Systematics*, *36*(1), 319–344. <https://doi.org/10.1146/annurev.ecolsys.36.102003.152614>
- 816 Urbina, I., Sardans, J., Grau, O., Beierkuhnlein, C., Jentsch, A., Kreyling, J., & Peñuelas, J. (2017). Plant  
817 community composition affects the species biogeochemical niche. *Ecosphere*, *8*(5), e01801.  
818 <https://doi.org/10.1002/ecs2.1801>
- 819 U.S. Geological Survey. (2017). *Landsat Quality Assurance ArcGIS Toolbox*. doi: 10.5066/F7JM284N



- 820 Vermote, E., Justice, C., Claverie, M., & Franch, B. (2016). Preliminary analysis of the performance of the Landsat  
821 8/OLI surface reflectance product. *Remote Sensing of Environment*, 185, 46–56.  
822 <https://doi.org/10.1016/j.rse.2016.04.008>
- 823 Vranken, I., Baudry, J., Aubinet, M., Visser, M., & Bogaert, J. (2015). A review on the use of entropy in landscape  
824 ecology: Heterogeneity, unpredictability, scale dependence and their links with thermodynamics.  
825 *Landscape Ecology*, 30(1), 51–65. <https://doi.org/10.1007/s10980-014-0105-0>
- 826 Wam, H. K., Felton, A. M., Stolter, C., Nybakken, L., & Hjeljord, O. (2018). Moose selecting for specific nutritional  
827 composition of birch places limits on food acceptability. *Ecology and Evolution*, 8(2), 1117–1130.  
828 <https://doi.org/10.1002/ece3.3715>
- 829 Waring, R. H., Coops, N. C., Fan, W., & Nightingale, J. M. (2006). MODIS enhanced vegetation index predicts tree  
830 species richness across forested ecoregions in the contiguous U.S.A. *Remote Sensing of Environment*,  
831 103(2), 218–226. <https://doi.org/10.1016/j.rse.2006.05.007>
- 832 Zhang, L.-L., & He, W.-M. (2009). Consequences of ramets helping ramets: No damage and increased nutrient use  
833 efficiency in nurse ramets of *Glechoma longituba*. *Flora - Morphology, Distribution, Functional Ecology*  
834 *of Plants*, 204(3), 182–188. <https://doi.org/10.1016/j.flora.2008.02.001>
- 835 Zhao, N., He, N., Wang, Q., Zhang, X., Wang, R., Xu, Z., & Yu, G. (2014). The altitudinal patterns of leaf c:n:p  
836 stoichiometry are regulated by plant growth form, climate and soil on changbai mountain, china. *PLOS*  
837 *ONE*, 9(4), e95196. <https://doi.org/10.1371/journal.pone.0095196>
- 838

839 **Figure legends**

840 **Figure 1.** The roadmap of our methods adapted from Leroux et al. 2017. Our study location occurred on the island  
841 of Newfoundland, Canada (a) where we set up four chronosequenced meandering transect grids each consisting of  
842 50 sampling locations (b). At each sample location we set up 22.6 m diameter circular plots (c), and along a 22.6 m  
843 long, 1 m wide shrub belt (c) we collected density measures of our study species for a max of five per height class:  
844 0-50 cm, 51-100 cm, 101-150 cm, 151-200 cm, coded as A, B, C, and D, respectively (d). We collected foliar  
845 samples in each intercardinal corner of the sample plot, starting in the NE corner and moving clockwise until a  
846 sufficient and representative sample was acquired (e). Species codes used: balsam fir (ABBA), red maple (ACRU),  
847 white birch (BEPA), black spruce (PIMA), and lowbush blueberry (VAAN) (e). We collected biomass samples (i.e.,  
848 all new growth foliar material) on the periphery of the grids from approximately fifty individuals distributed across  
849 height classes (f). Allometric models were fit using biomass as a function of height and basal diameter, from which  
850 we parameterized shrub belt correlates to acquire plot level biomass estimates. We used these estimates to determine  
851 foliar elemental quantity, stoichiometric ratios, and phytochemical (biomass) traits relativized to biomass density at  
852 the plot level. We fit 16 models, including a null model, for response variables of foliar elemental (percent and  
853 quantity), stoichiometric, and phytochemical traits using spatially explicit covariates of land cover, productivity,  
854 biotic (stand age, height, canopy closure) and abiotic (elevation, aspect, and slope) factors (g). Using top model  
855 coefficient estimates and or average coefficients for competing top models, we constructed spatial surfaces of foliar  
856 ESP trait surfaces that link physiological properties to ecosystem processes at the landscape extent.

857  
858 **Figure 2.** Top ranked model results (i.e., models  $\Delta AIC_c < 2$ ) at the trait level (a, b) and species level (c, d) for foliar  
859 percent elemental (a, c) and foliar quantity elemental (b, d) traits. Results are organized to show patterns of evidence  
860 to support spatial relationships between response and explanatory variables. Superimposed descriptive text on each  
861 portion of the stacked bar graphs includes the averaged pseudo  $R^2$  values for top models if the count  $> 1$ , if count is  
862 = 1 then only the  $R^2$  for that model is present. In addition, at the species level (c, d) for our response variables (i.e.,  
863 C, N, and P) superimposed text indicates significant coefficients and their sign (+/-) for our explanatory variables of  
864 land cover, EVI, biotic, and abiotic. Coded values for explanatory variables represent their comprised variables and  
865 factor levels. For land cover, LC-C, LC-D, and LC-M indicate coniferous, deciduous, and mixed, respectively. EVI

866 represents the Enhanced Vegetation Index. For biotic variables, AC indicates age class with 3, 4, 5 representing  
867 factor levels of 41-60, 61-80, and 81-100 years, respectively. HC indicates height class with 3, 4, 5 representing  
868 factor levels of 6.6- 9.5, 9.6-12.5, 12.6-15.5 metres, respectively. CD indicates canopy density with 2, 3, 4  
869 representing factor levels of 51-75, 26-50, 10-25 percent closed. For abiotic variables, Elev, Asp, T-Slp represent  
870 elevation, aspect, and slope, respectively. If a response variable is supported by more than one top model, a  
871 sequential numbering is used to indicate the rank of that model added as a suffix to the response variable text (i.e.,  
872 C2 indicates the second top ranked model in support of foliar percent carbon). The asterisk symbol (\*) is used to  
873 indicate that the null model was within  $\Delta AIC_c < 2$ . See Appendix 9 for a coefficient signs (+/-) and Appendix 12-15  
874 for coefficient estimates, standard deviations, and confidence intervals.

875  
876 **Figure 3.** Top ranked model results (i.e., models  $\Delta AIC_c < 2$ ) at the trait level (a) and species level (b) for foliar  
877 stoichiometric traits (i.e., CN, CP, NP). All specifications as in Figure 2. See Appendix 9 for a coefficient signs (+/-)  
878 and Appendix 16-18 for coefficient estimates, standard deviations, and confidence intervals.

879  
880 **Figure 4.** Top ranked model results (i.e., models  $\Delta AIC_c < 2$ ) at the trait level (a) and species level (b) for foliar  
881 phytochemical traits. Coded values are supplied for response variables as with upper case letters representing the  
882 trait and lower case letter representing either raw (r) or biomass basis (b). For response variables, T, M, MA, ME, S,  
883 and D indicate terpene, monoterpene, monoterpene alcohol, monoterpene ester, sesquiterpene, and phytochemical  
884 diversity, respectively. All specifications as in Figure 2. See Appendix 9 for a coefficient signs (+/-) and Appendix  
885 19-21 for coefficient estimates, standard deviations, and confidence intervals.

886  
887 **Figure 5.** Example of spatially explicit foliar ESP trait distribution models. In (a) we show our spatial area of  
888 interest as the black outlined region. Our grid locations are denoted in panel a using the star outline. The red box  
889 shown in panel a, is the extent of the subsequent maps provided in this figure, a close up view of spatial foliar ESP  
890 patterns for black spruce (PIMA). Foliar percent carbon (b) ranges from 47.9 to 56.04 and is predicted using spatial  
891 correlates of land cover, biotic and abiotic factors (pseudo  $R^2 = 0.65$ ). Foliar stoichiometric C:N ranges from 44.9 to  
892 86.2 and is predicted using spatial correlates of EVI and biotic factors (pseudo  $R^2 = 0.38$ ). Foliar terpene (raw)

893 ranges from 0.003 to 32.52 and is predicted using spatial correlates of biotic and abiotic factors (pseudo  $R^2 = 0.26$ ).  
894 Although these traits are predicted using different spatial correlates, emerging spatial patterns in trait variability  
895 suggest different processes are acting on trait expressions in different areas. For instance, high foliar C areas may  
896 relate to community type (land cover), forest structure (biotic), and topographic conditions (abiotic), however,  
897 patterns of C:N forest structure (biotic) and site productivity (EVI) indicate nutrient limitation areas with lower  
898 values have higher foliar nitrogen content. Moreover, foliar terpene patterns provide contours from which higher  
899 herbivore interactions results in increased terpene production. When overlaid with C and C:N we can gleam spatial  
900 patterns on the allocation of C to terpene production in terms of nutrient limitation constraints.

901 **Table Legend**

902 **Table 1.** Hypotheses for land cover, productivity, biotic (forest structure: age, height, canopy closure) and abiotic  
903 (elevation, aspect, slope) spatial covariates relationship to the variability of foliar elemental, stoichiometric, and  
904 phytochemical traits. For each spatial covariate we provide references to foliar ESP traits and to community level  
905 coordination of trait variability. Our approach does not consider a community weighted assessment of foliar ESP  
906 traits across species, instead we compare spatial covariates at the trait and species level to investigate potential  
907 commonalities.

908 **Table 2.** List of models used to assess spatial covariates of foliar trait distribution. Land cover and productivity are  
909 derived from Landsat 8 scenes. The land cover dataset was acquired from the Commission for Environmental  
910 Cooperation and provides general classification of habitat types, i.e., coniferous, deciduous, mixedwood forests, as  
911 well as others. Our proxy for productivity was acquired from Landsat 8 as the Enhanced Vegetation Index spectral  
912 product. Our biotic factors include the grouped covariates of forest age, height, and canopy density. These variables  
913 were derived from Forest Resource Inventory datasets supplied by the Provincial Government of Newfoundland and  
914 Labrador and from the Federal Government of Canada's Park agency. These variables are grouped as their  
915 designation of these three measures are contained within a single polygon and represents associated conditions.  
916 Similarly, our abiotic factors include the grouped covariates of elevation, aspect, and slope derived from a single  
917 source, a Digital Canadian Elevation Model.

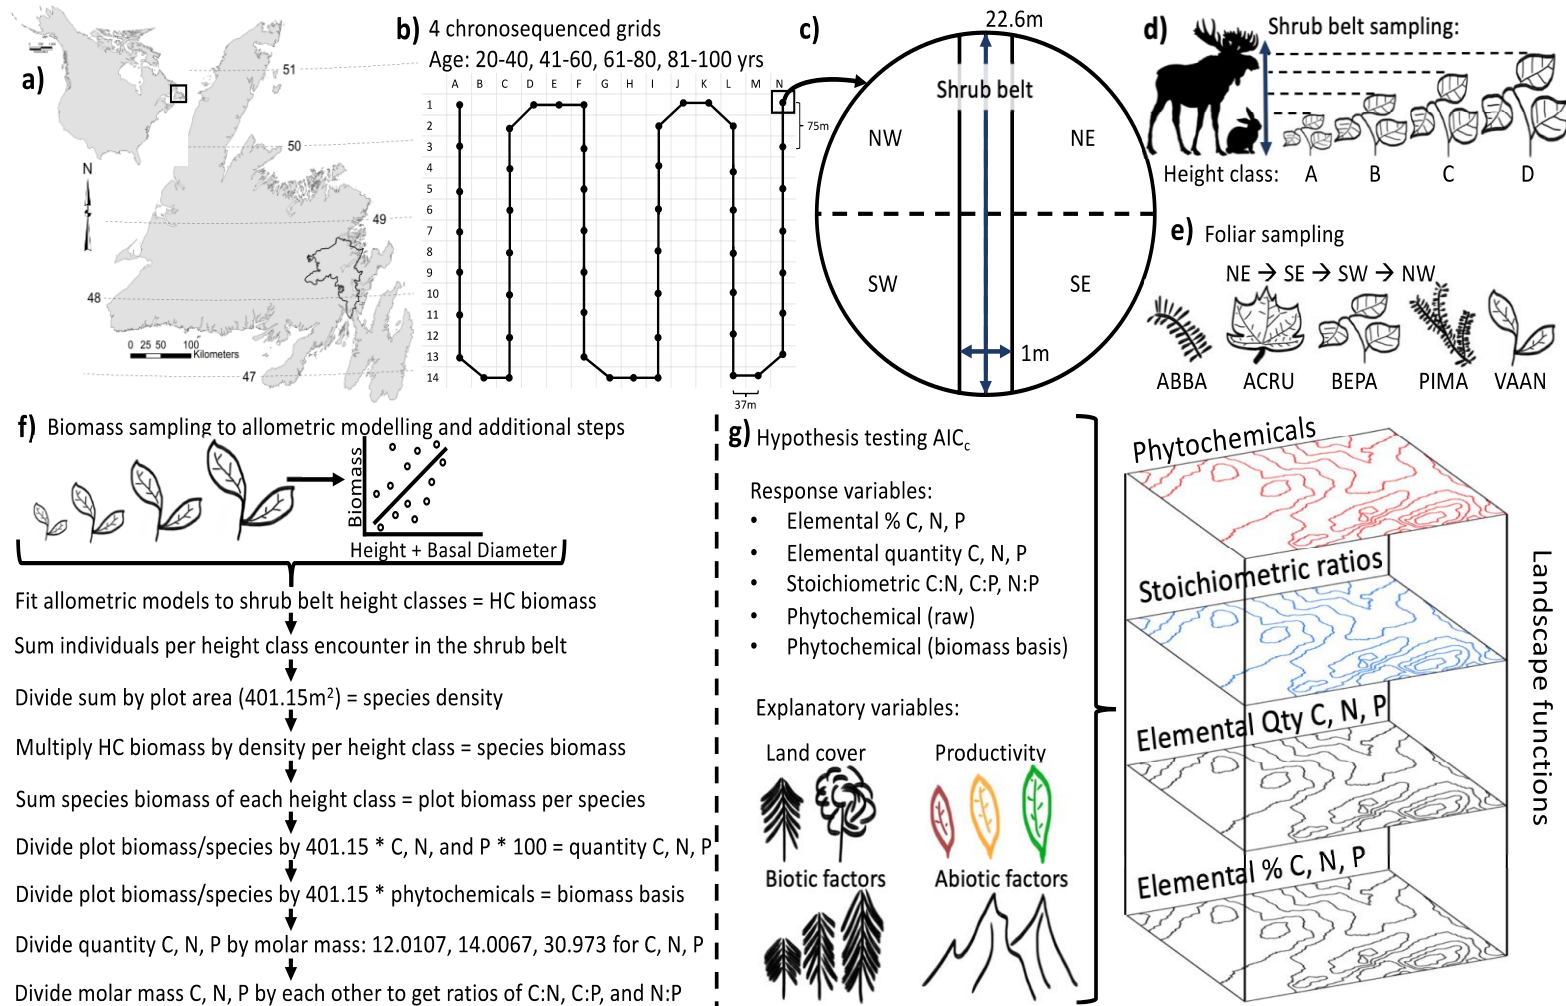

919

920 **Figure 1.**

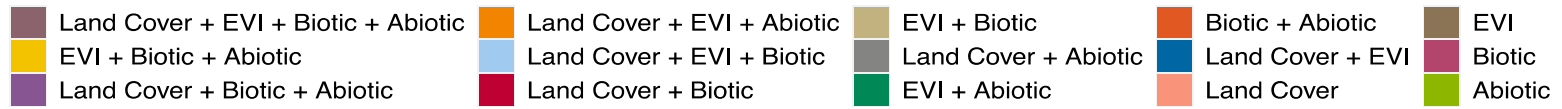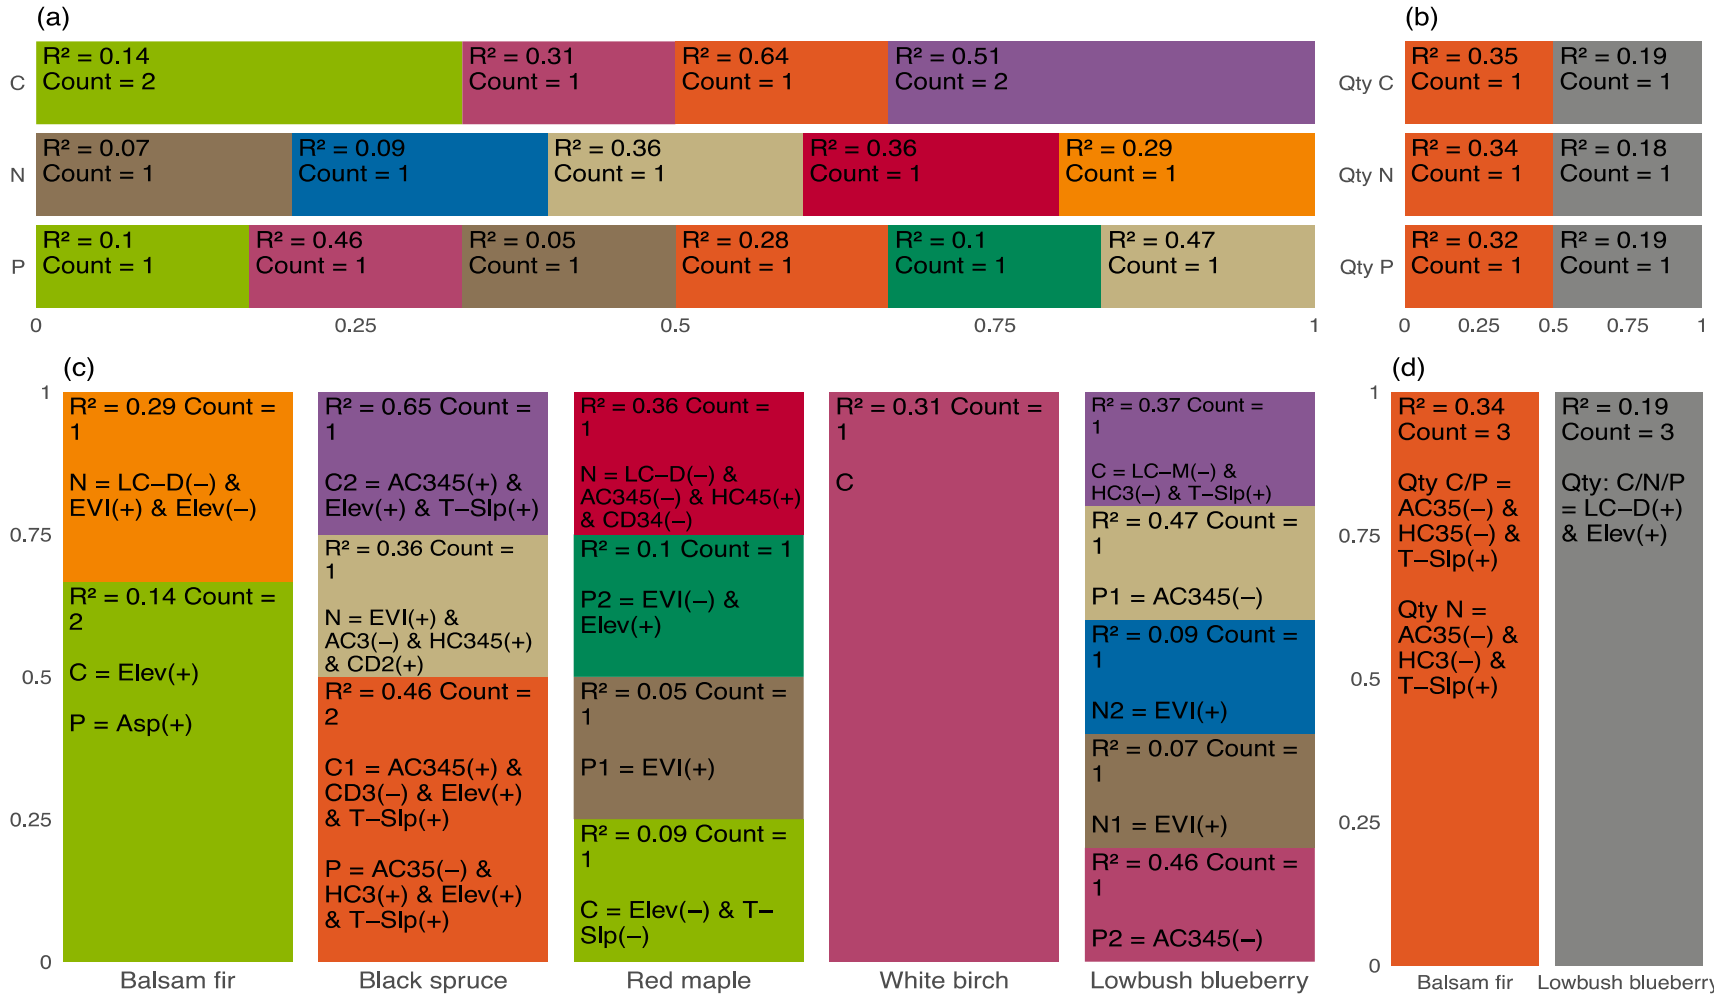

921

922 **Figure 2.**

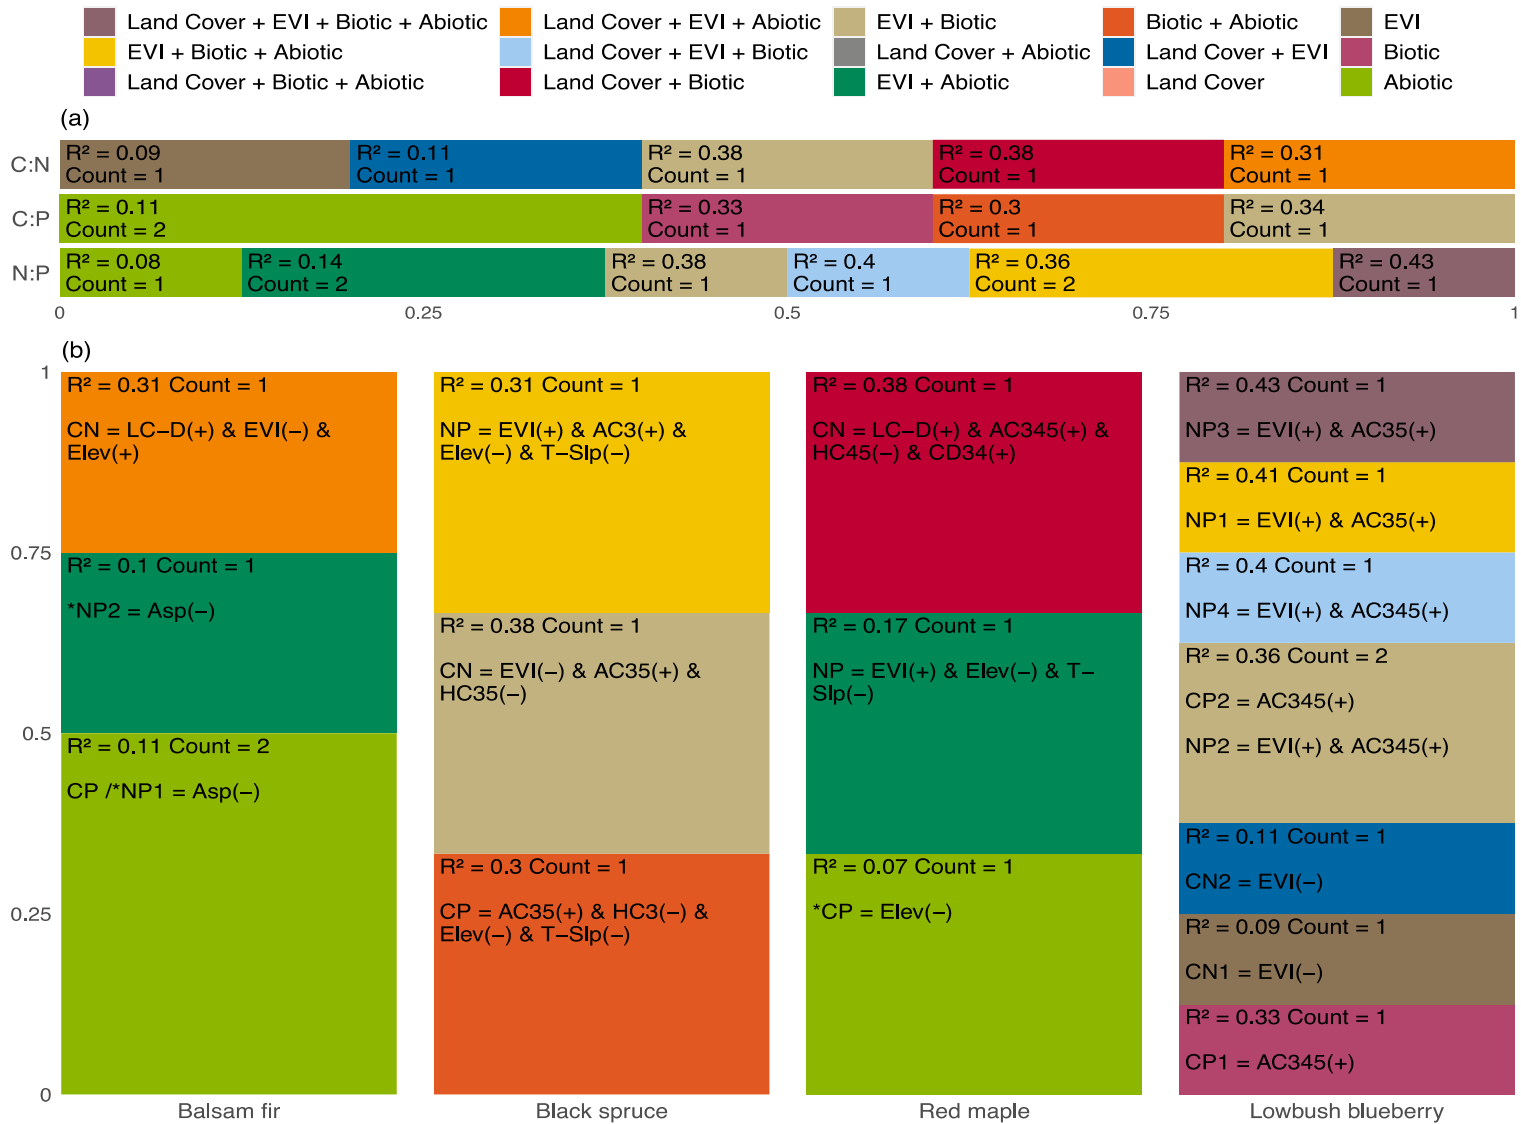

923

924 **Figure 3.**



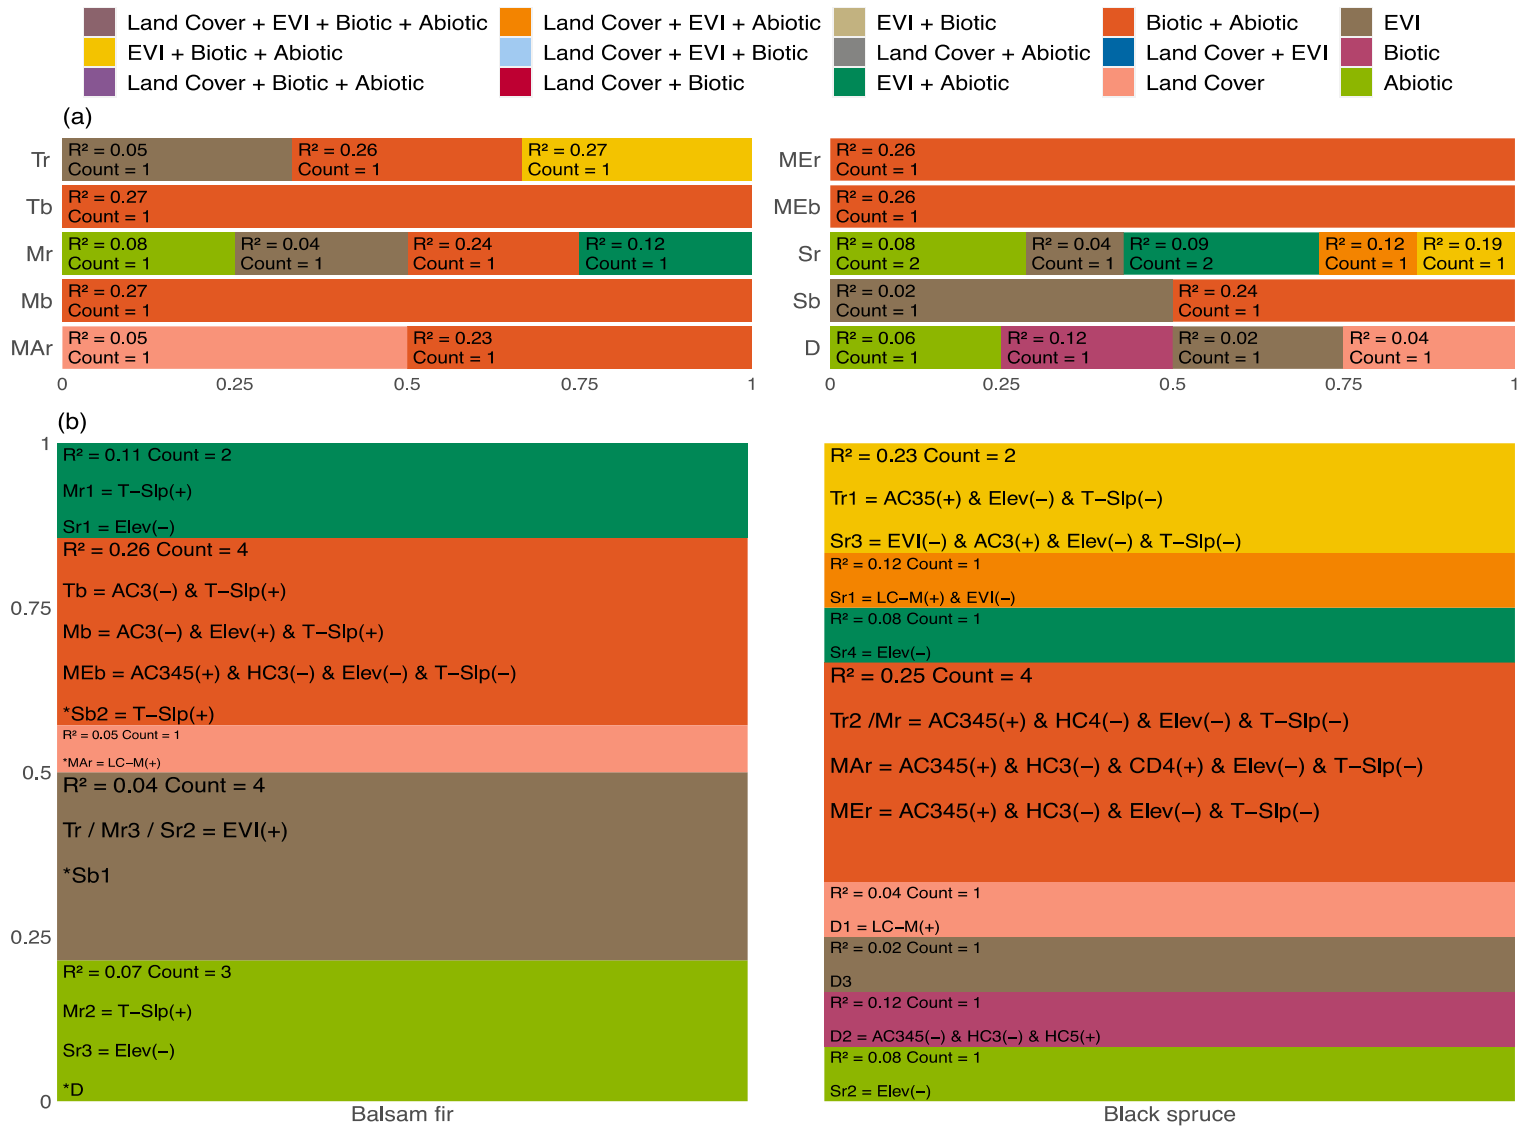

925

926 **Figure 4.**

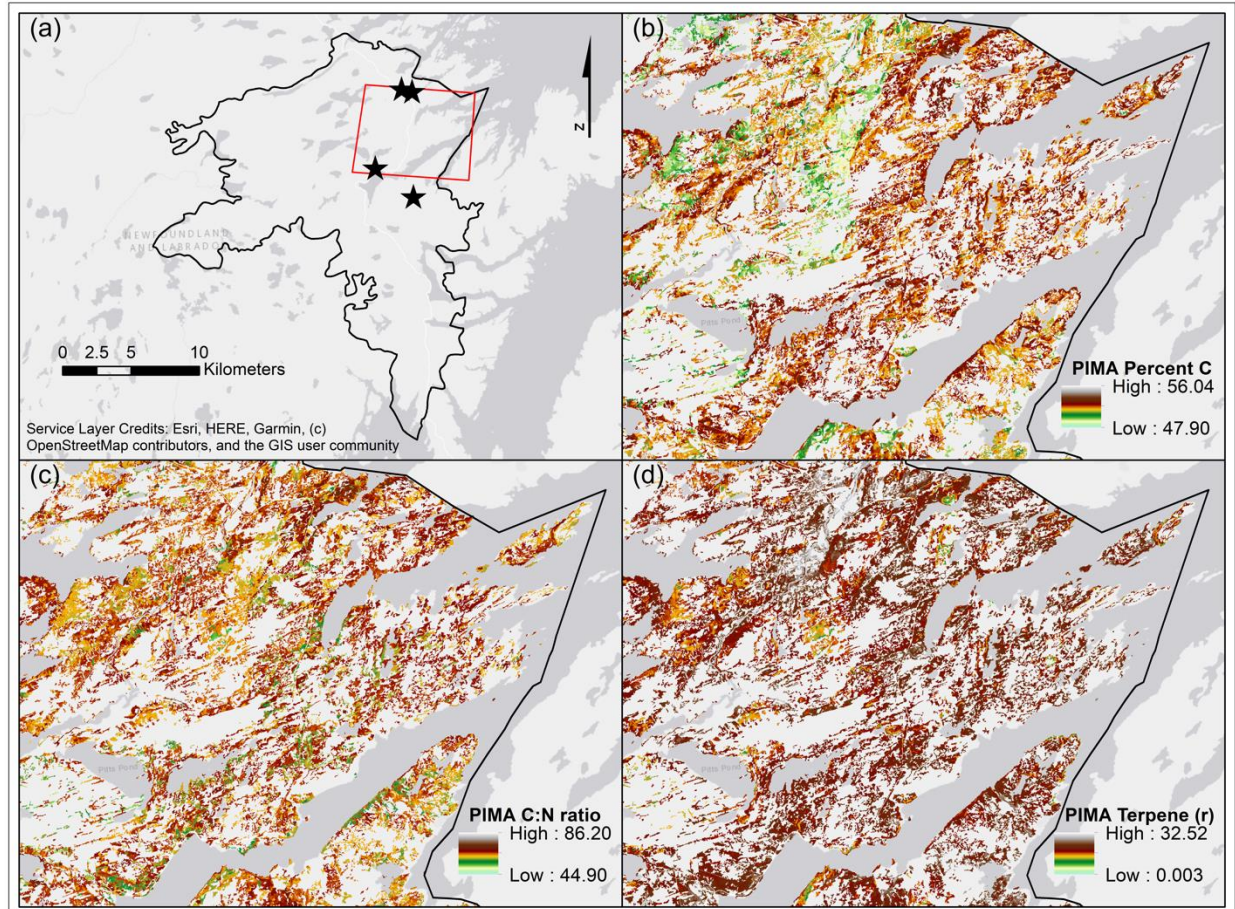

927

928 **Figure 5.**

929 **Tables**

930 *Table 1.*

| Spatial covariate                | Hypothesized relationship                                                                                                                                                                                                                                                                                                                                                                                                                                                                                                                                                                                                                                                                                                                            |
|----------------------------------|------------------------------------------------------------------------------------------------------------------------------------------------------------------------------------------------------------------------------------------------------------------------------------------------------------------------------------------------------------------------------------------------------------------------------------------------------------------------------------------------------------------------------------------------------------------------------------------------------------------------------------------------------------------------------------------------------------------------------------------------------|
| <b>Land cover</b>                | Land cover types, such as coniferous, deciduous, mixedwood, provide a proxy for community-level processes associated with litter-soil-nutrient feedbacks, nitrogen deposition, and competition for those elemental resources that influence foliar elemental traits (Hallett & Hornbeck, 1997; Ponette-González et al., 2010; Sardans et al., 2016); stoichiometric traits (Leroux et al., 2017; J. Sardans et al., 2016); and phytochemical traits (Hunter, 2016; Morquecho-Contreras et al., 2018). In addition across species coordination of foliar trait variability has been observed for some species (Yong Jiang et al., 2015; Strahan et al., 2016).                                                                                        |
| <b>Productivity</b>              | The Enhanced Vegetation Index is a Landsat derived proxy for productivity (i.e., the rate of greenness across time). Productivity is often a site level proxy associated with soil fertility, nutrient availability, and biomass production, as such it has been shown to influence foliar elemental traits (Ågren, 1988; Pan et al., 2004; Radwan & Harrington, 2011); stoichiometric traits (Blanes et al., 2013; Kerkhoff et al., 2005; Mendez & Karlsson, 2005); and phytochemical traits (Booker & Maier, 2001; Hunter & Schultz, 1995; Lindroth et al., 2002). As well productivity has been shown to influence foliar traits across species at the community level (Fyllas et al., 2020; Santiago et al., 2004; Tang et al., 2018).           |
| <b>Forest structure (biotic)</b> | Forest structure is characterized by the structural variability of forest conditions such as dominant tree height, stand age, and canopy closure. Collectively these parameters link structural characteristics with solar radiation interception across vertical and horizontal gradients of forest vegetation, precipitation interception, and space competition. As such, for understory vegetation these structural characteristics have been shown to influence foliar elemental traits (Becknell & Powers, 2014; Richardson, 2004; Rijkers et al., 2000; Smithwick et al., 2003); stoichiometric traits (Fan et al., 2015; Niinemets & Kull, 1998; Sardans et al., 2016); phytochemical traits (Couture et al., 2014; Forkner & Marquis, 2004; |

---

Hemming & Lindroth, 1999; Sedio et al., 2017; Shure & Wilson, 1993); and notable examples show multi-species trait response to these structural conditions (Kichenin et al., 2013; Lohbeck et al., 2013).

**Topographic  
(abiotic)**

Topographic position defined by elevation, aspect, and slope are key parameters of the abiotic environment link to temperature/precipitation (including type) gradients, the incidence angle of solar radiation. Collectivity these parameters have been useful in explaining the variability of foliar elemental traits (Balzotti et al., 2016; Zhao et al., 2014); stoichiometric traits (Müller et al., 2017; Zhao et al., 2014); phytochemical traits (Glassmire et al., 2016; Pellissier et al., 2016); and there is evidence to suggest trait variability coordination across species, occurs in response to these abiotic parameters (Callis-Duehl et al., 2017; Descombes et al., 2017).

---

932 *Table 2.*

| <b>Model Number</b> | <b>Explanatory Variables</b>                   |
|---------------------|------------------------------------------------|
| <b>1</b>            | ~ Land Cover + Productivity + Biotic + Abiotic |
| <b>2</b>            | ~ Productivity + Biotic + Abiotic              |
| <b>3</b>            | ~ Land Cover + Biotic + Abiotic                |
| <b>4</b>            | ~ Land Cover + Productivity + Abiotic          |
| <b>5</b>            | ~ Land Cover + Productivity + Biotic           |
| <b>6</b>            | ~ Land Cover + Biotic                          |
| <b>7</b>            | ~ Productivity + Biotic                        |
| <b>8</b>            | ~ Land Cover + Abiotic                         |
| <b>9</b>            | ~ Productivity + Abiotic                       |
| <b>10</b>           | ~ Biotic + Abiotic                             |
| <b>11</b>           | ~ Land Cover + Productivity                    |
| <b>12</b>           | ~ Land Cover                                   |
| <b>13</b>           | ~ Productivity                                 |
| <b>14</b>           | ~ Biotic                                       |
| <b>15</b>           | ~ Abiotic                                      |
| <b>16</b>           | ~ Null                                         |

933

## 934 **Appendices**

### 935 **Appendix 1**

936 Detailed description of Fig. 1: the roadmap of our methods. Our study area (a) is location on the eastern side of the  
937 island of Newfoundland, North America, Canada, as shown by the outlined area. Generally, bounded between the  
938 47<sup>th</sup> and 48<sup>th</sup> latitude this biogeographical area is composed of boreal forest conditions primarily dominated by  
939 intermediate-aged, closed canopy, forest stands of black spruce (*Picea mariana*), balsam fir (*Abies balsamea*), white  
940 birch (*Betula papyrifera*), and trembling aspen (*Populus tremuloides*) (Ecological Stratification Working Group,  
941 1996; South, 1983). Within this area we set up four chronosequenced grids, consisting of connected meandering  
942 transects. Age classes and grid layout shown in panel b. Grids were originally designed for snowshoe hare (*Lepus*  
943 *americanus*) trapping and to allow us to relate foliar resource quality to hare home range size and ecology. Each grid  
944 is comprised of 50 sampling locations, spaced equally apart by 75 m with closer sample location rounding the  
945 corners (b). At each sample location we set up 22.6 m diameter circular plots (c). Within each plot we collected  
946 density estimates for each of our study species along a 22.6 m long and 1 m wide shrub belt transect (c/d). Moving  
947 in a north to south direction, along the belt, for each of our study species encountered we measured their height and  
948 basal diameter, and the distance at which it was encountered, for a maximum of five individuals per height class: 0-  
949 50 cm, 51-100 cm, 101-150 cm, and 151-200 cm, denoted as A, B, C, and D respectively (d). We restricted our  
950 sampling to species within 0-2 m heights (d) as these individuals represent the available forage for common boreal  
951 herbivores, moose (*Alces alces*) and snowshoe hare. Within each plot, starting in the NE corner (e), we moved in a  
952 clockwise direction and collected foliar samples of our study species, as well we measured their height and basal  
953 diameter. In panel e, we use coded names for our study species, balsam fir (ABBA), red maple (ACRU), white birch  
954 (BEPA), black spruce (PIMA), and lowbush blueberry (VAAN); see Appendix 2 for a description of our study  
955 species. We collect foliar material for our study species until we had a sufficient sample size of approximately 10-20  
956 g. Using foliar samples for each of our study species, we combined representative units of foliar material until a wet  
957 weight sample of 10 g and 4 g was amassed – the amount required for elemental and phytochemical analysis,  
958 respectively. At the Agriculture Food Lab (AFL) at the University of Guelph Ontario, Canada the carbon and  
959 nitrogen composition of foliar material determined using an Elementar Vario Macro Cube. Foliar phosphorus  
960 content was determined using a microwave acid digestion CEM MARSxpress microwave system and brought to

961 volume using Nanopure water. The clear extract supernatant was further diluted by 10 to accurately fall within  
962 calibration range and reduce high level analyte concentration entering the inductively coupled plasma mass  
963 spectrometry (ICP-MS) detector (Poitevin, 2016). This provides us with a measure of percent foliar C, N, and P. At  
964 the Laboratoire PhytoChemia Inc in Quebec, Canada, the phytochemical composition of balsam fir and black spruce  
965 foliar samples were determined using a gas chromatography solvent extraction with an internal standard and a  
966 correction factor (Cachet et al., 2016). This procedure produced mg/g measures of individual terpene compounds,  
967 see Appendix 7 Table A2 for a complete list of identified terpene compounds and groups. In addition, along the  
968 periphery of our study grids and outside of the sample plots, in randomly selected locations we collected all new  
969 growth foliar material for each of our study species from approximately 50 individuals, the number of samples  
970 distributed across the height classes listed above (f). As well, we measured the height and basal diameter for each  
971 individual sampled. The foliar material was dried, providing a measure of biomass from which we fit linear  
972 allometric models using covariates of height and basal diameter (f). Using coefficient estimates from our allometric  
973 models we predicted biomass estimates for our study species per height class from shrub belt measurements. In the  
974 few instances where we had obtained foliar samples but did not encounter individuals on the shrub belt we  
975 augmented the total number of individuals per height class as the total number of foliar samples in that height class.  
976 We subsequently summed biomass estimates per height class for each of our study species and divided this measure  
977 by the area of the circular plot ( $401.15 \text{ m}^2$ ) to get a density estimate. We then multiplied biomass by density for each  
978 height class to get a species biomass estimate, which was summed together, providing a plot level biomass estimate  
979 per species. To obtain elemental quantity estimates we divided biomass by the plot area multiplied by the foliar  
980 percentage of carbon, nitrogen, and phosphorus. As well, we did the same for phytochemicals to obtain a plot level  
981 biomass basis estimate of foliar phytochemicals. To determine stoichiometric ratios, we divided quantity C, N, and P  
982 estimates by their corresponding molar mass and then divided the resulting value together to get foliar C:N, C:P, and  
983 N:P for each study species. Using response variables of foliar percent elemental, quantity elemental, stoichiometric,  
984 and phytochemical we constructed sixteen plausible model combinations with spatially explicit covariates of land  
985 cover, productivity, abiotic, and biotic factors and used Akaike Information Criterion to determine plausible  
986 explanations (g). We then assessed top models and extracted coefficient estimates for use in constructing

987 distribution models of foliar elemental, stoichiometric, and phytochemical traits which provides us surfaces to  
988 inform landscape function (g).



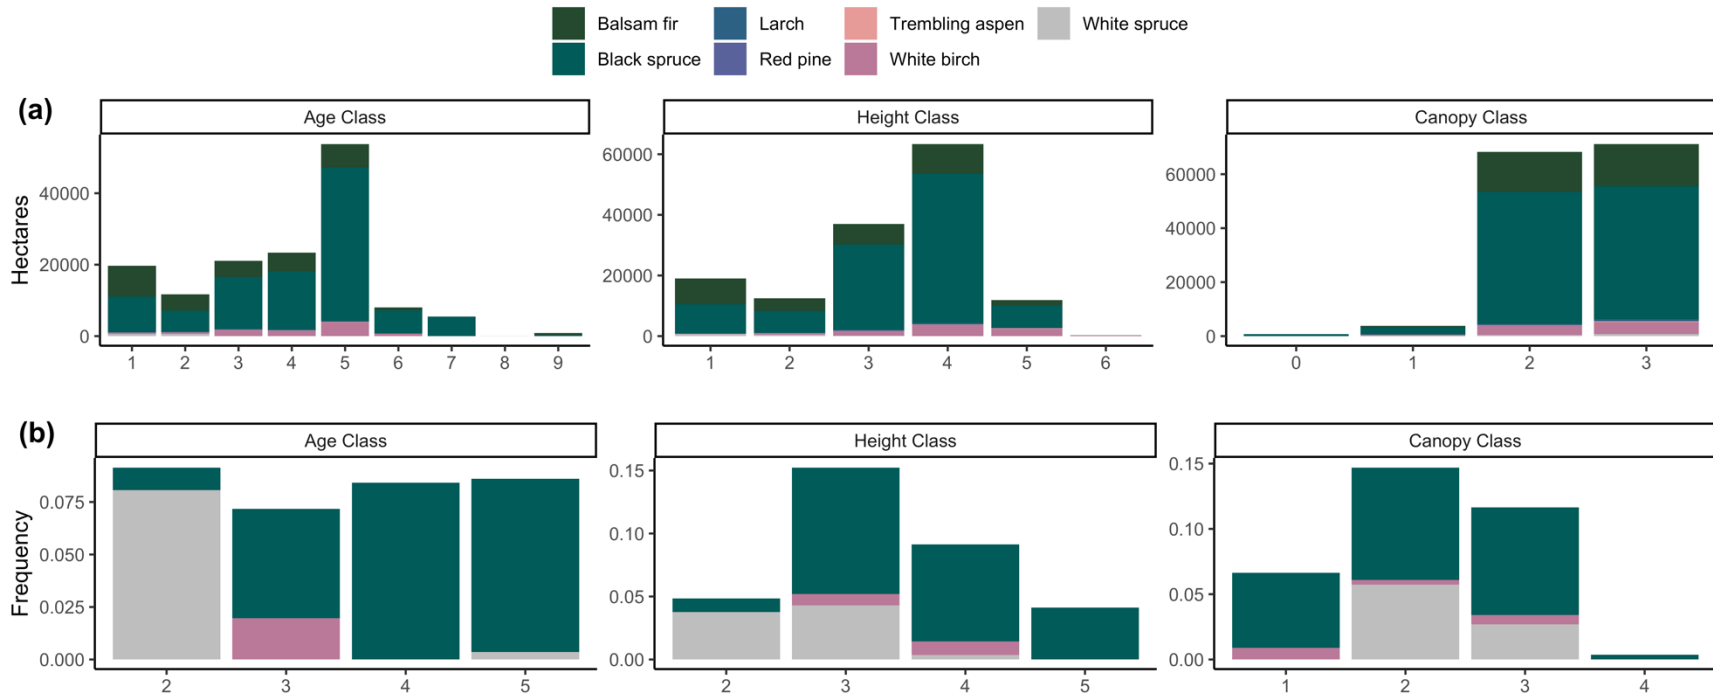

990  
 991 **Figure A1.** The top (a) shows the total number of hectares for each dominant species forest type within our landscape area of interest, for stand metrics of age,  
 992 height, and canopy class. Age class codes represent 20-year intervals ranging from 1 (0-20 years) to 9 (161+ years). Height class codes represent 3.5 m intervals  
 993 of tree heights ranging from 1 (0-3.5 m) to 6 (15.6-18.5 m). Canopy class codes represent 25 % intervals of canopy closeness where 0 indicates a regenerating  
 994 stand that is 100 % closed and 4 indicates a 10 -25% closed canopy conditions. The bottom (b) shows the frequency in which these dominant species forest  
 995 stands were sampled for foliar ESP traits of our study species. Here we show that although our sampling design is not ideal for spatial distribution modelling, we

996 sampled within representative units of forest types available on the landscape, thus strengthening our inference for the spatial distribution of foliar ESP traits on  
997 this landscape.  
998

999 **Appendix 3**

1000 **Table A1.** A complete list of phytochemical compounds and classes for terpenes identified in balsam fir and black spruce foliar samples. Only common terpene  
 1001 groups between these two coniferous species were used: terpene (includes all compounds identified), monoterpene, monoterpene alcohol, monoterpene ester,  
 1002 sesquiterpene, and diversity (computed using all compounds identified).

| <b>Group</b>       | <b>Balsam fir</b>                       | <b>Black spruce</b>               |
|--------------------|-----------------------------------------|-----------------------------------|
|                    | <i>Chemical Name</i>                    | <i>Chemical Name</i>              |
| <b>Monoterpene</b> | Tricyclene                              | Tricyclene                        |
|                    | $\alpha$ -Pinene                        | $\alpha$ -Pinene                  |
|                    | Camphene                                | Camphene                          |
|                    | $\beta$ -Pinene (main) + Sabinene       | $\beta$ -Pinene (main) + Sabinene |
|                    | Myrcene                                 | Myrcene                           |
|                    | $\Delta$ -Carene                        | $\Delta$ -Carene                  |
|                    | Limonene (main) + $\beta$ -Phellandrene | $\alpha$ -Phellandrene            |
|                    | $\gamma$ -Terpinene                     | Limonene (main) + 1,8-cineole     |
|                    | Terpinolene                             | Terpinolene                       |
|                    | <b>Monoterpenic</b>                     | Linalool                          |
| <b>Alcohol</b>     | Camphene hydrate                        | Camphene hydrate                  |
|                    | Borneol                                 | Citronellol                       |
|                    | $\alpha$ -Terpineol                     | $\alpha$ -Terpineol               |

|                               | Thymol                                                                                                                                                                                                                  | ---                                                                                                                                                                                                                        |
|-------------------------------|-------------------------------------------------------------------------------------------------------------------------------------------------------------------------------------------------------------------------|----------------------------------------------------------------------------------------------------------------------------------------------------------------------------------------------------------------------------|
| <b>Monoterpenic Ester</b>     | Bornyl acetate                                                                                                                                                                                                          | Unknown "PIMA 6"<br>Bornyl acetate (main) + Isobornyl acetate<br>endo-Fenchyl acetate<br>trans-Pinocarvyl acetate<br>cis-Piperityl acetate<br>Geranyl acetate                                                              |
| <b>Sesquiterpene</b>          | Longifolene<br>$\beta$ -Caryophyllene<br>$\alpha$ -Humulene<br>(E)- $\beta$ -Farnesene<br>Unknown sesquiterpene<br>$\alpha$ -Muurolene<br>(Z)- $\alpha$ -Bisabolene<br>$\beta$ -Bisabolene<br>(E)- $\alpha$ -Bisabolene | $\beta$ -Elemene<br>$\beta$ -Caryophyllene<br>$\alpha$ -Humulene<br>Germacrene D<br>$\gamma$ -Cadinene (main) + Cubebol<br>$\alpha$ -Muurolene<br>$\delta$ -Cadinene<br>Unknown sesquiterpene<br>(E)- $\alpha$ -Bisabolene |
| <b>Sesquiterpenic alcohol</b> | --                                                                                                                                                                                                                      | Germacrene D-4-ol<br>$\tau$ -Cadinol + $\tau$ -Muurolol (approx 1:1)<br>$\alpha$ -Cadinol                                                                                                                                  |

---

|                                 |                     |                       |
|---------------------------------|---------------------|-----------------------|
|                                 |                     | Oplopanone            |
| <b>Sesquiterpenic ether</b>     | Caryophyllene oxide |                       |
| <b>Monoterpenic aldehyde</b>    | --                  | $\alpha$ -Campholenal |
| <b>Monoterpenic ketone</b>      | Piperitone          | --                    |
| <b>Maltol</b>                   | Maltol              | --                    |
| <b>Oxygenated sesquiterpene</b> | --                  | Unknown "PIMA 18"     |
| <b>Unknown</b>                  | --                  | Unknown "PIMA 9"      |

---

1003

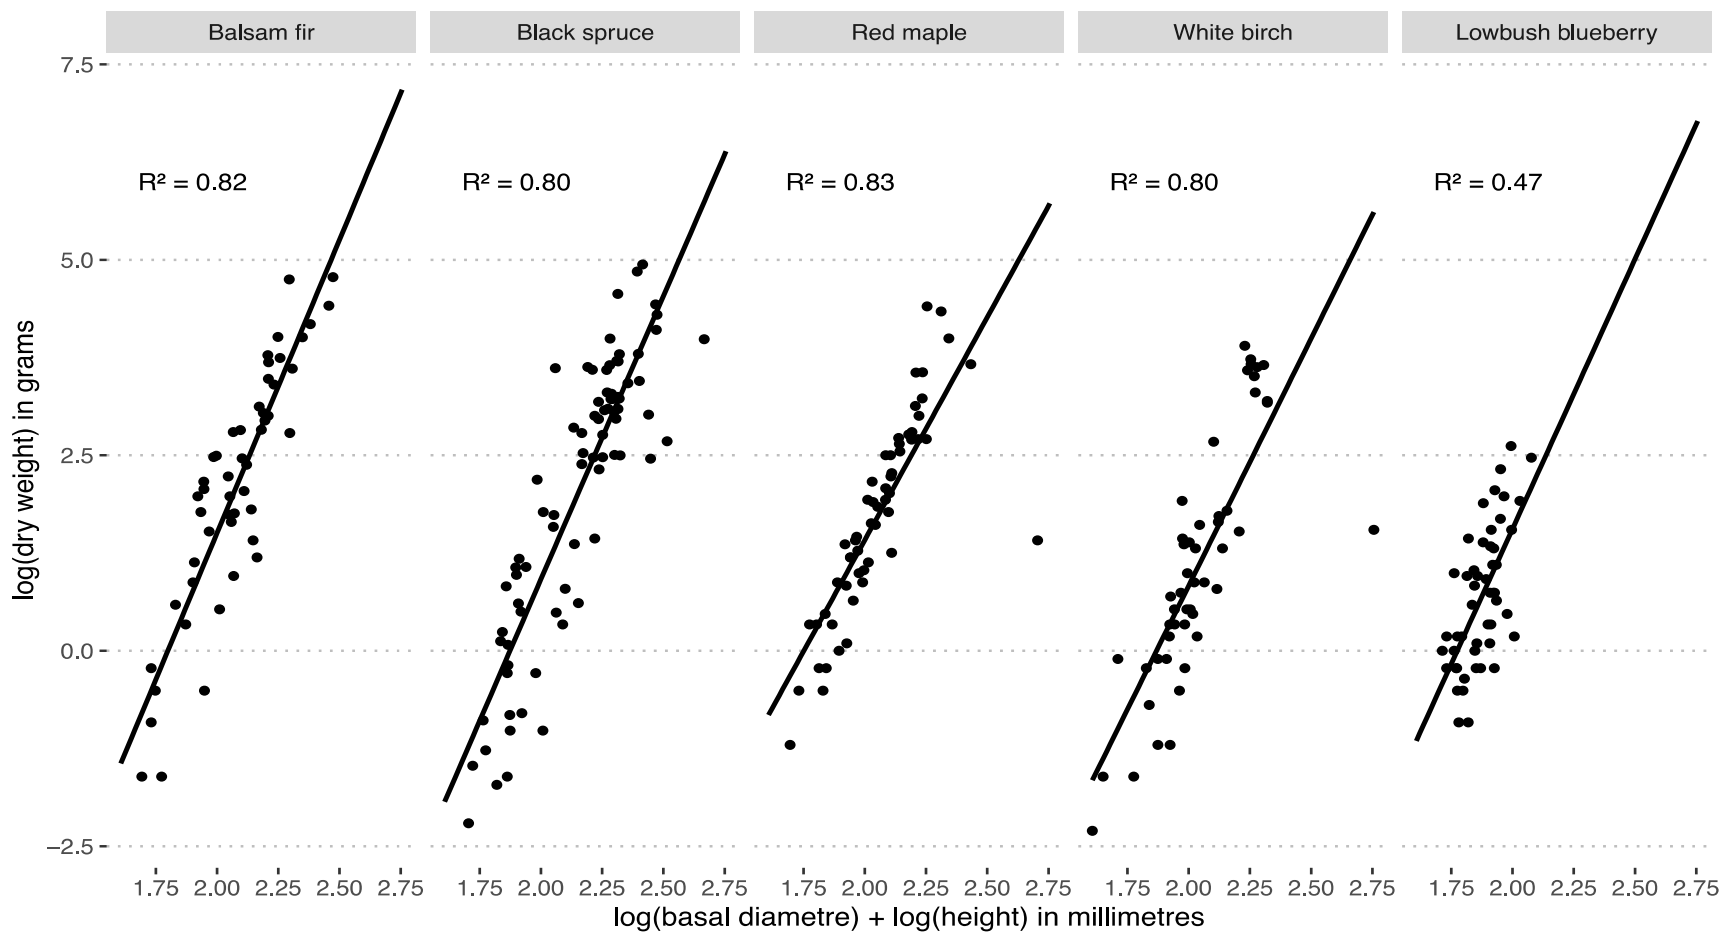

1005

1006 **Figure A2.** Allometric modelling of biomass in terms of basal diameter and height for each of our study species, balsam fir, black spruce, red maple, white birch,

1007 and lowbush blueberry. The goodness of fit (adjusted R<sup>2</sup>) is superimposed on each species regression plot.

1008 **Appendix 5**

1009 **Table A2.** The number of individuals that we augmented using foliar samples to obtain density measures when  
1010 individuals of that species were not encountered on the shrub belt. Numbers are shown for each species per height  
1011 class relative to the total number of individuals used in that height class. Height class is coded as A = 0-50 cm, B =  
1012 51-100 cm, C = 101-150 cm, and D = 151-200 cm.

| <b>Species</b> | <b>Height Class</b> | <b>Elemental Sample</b> | <b>Phytochemical<br/>Sample</b> |
|----------------|---------------------|-------------------------|---------------------------------|
| <b>ABBA</b>    | A                   | 29/326                  | 30/310                          |
| <b>ABBA</b>    | B                   | 6/89                    | 9/91                            |
| <b>ABBA</b>    | C                   | 2/6                     | 1/5                             |
| <b>ABBA</b>    | D                   | 0/1                     | 0/1                             |
| <b>ACRU</b>    | A                   | 13/217                  |                                 |
| <b>ACRU</b>    | B                   | 26/164                  |                                 |
| <b>ACRU</b>    | C                   | 6/28                    |                                 |
| <b>ACRU</b>    | D                   | 1/3                     |                                 |
| <b>BEPA</b>    | A                   | 10/34                   |                                 |
| <b>BEPA</b>    | B                   | 33/63                   |                                 |
| <b>BEPA</b>    | C                   | 11/14                   |                                 |
| <b>BEPA</b>    | D                   | 3/6                     |                                 |
| <b>PIMA</b>    | A                   | 8/127                   | 8/120                           |
| <b>PIMA</b>    | B                   | 33/229                  | 35/223                          |
| <b>PIMA</b>    | C                   | 43/206                  | 44/199                          |
| <b>PIMA</b>    | D                   | 28/136                  | 29/135                          |
| <b>VAAN</b>    | A                   | 14/852                  |                                 |
| <b>VAAN</b>    | B                   | 2/160                   |                                 |
| <b>VAAN</b>    | C                   | 0/2                     |                                 |

1013

1014 **Appendix 6**

1015 Our spatial resolution was constrained by our coarsest dataset, Landsat 8, i.e., 30 m resolution. In ArcGIS, we  
1016 resampled elevation and our Digital Elevation Model from a 20 m to a 30 m resolution. The Forest Resource  
1017 Inventory vector dataset was rasterized at a 30 m resolution.

1018

1019 **Enhanced Vegetation Index (EVI):** Landsat 8 satellite imagery was acquired from the Earth Resources  
1020 Observation (EROS) and Science Centre Science Processing Architecture (ESPA). There were three Landsat 8  
1021 scenes available during our 2016 sampling time period; June 28, August 15, and September 16, 2016 with 0.46%,  
1022 20.18%, 4.39% land cloud cover respectively. As a standard product, Landsat 8 acquisitions contain a preprocessed  
1023 EVI surface reflectance scene. Newfoundland boreal forest demonstrably receives a greater amount of precipitation  
1024 and experiences shorter growing seasons due to Atlantic Ocean influence creating colder climatic conditions  
1025 compared to continental boreal forest conditions (South, 1983). Under these conditions, the EVI as a measure of  
1026 biological productivity performs better than the Normalized Difference Vegetation Index which commonly saturates  
1027 early in the season and does not account for the structural complexity of vegetative canopies (Muraoka et al., 2013;  
1028 Requena-Mullor et al., 2017; Waring et al., 2006). Using the Landsat Quality Assurance ArcGIS toolbox, publicly  
1029 accessible software from the U.S. Geological Survey, we extracted the following cloud coded bits from the pixel QA  
1030 band: cloud shadow, snow, cloud, high cloud confidence and high cirrus confidence (Jones et al., 2013; U.S.  
1031 Geological Survey, 2017). Using the 'Extract by Mask' ArcGIS function we removed cloudy pixels from our EVI  
1032 scenes. In R, we rescaled EVI scenes by dividing by 0.0001. Using the 'approxNA' function from the 'raster' R  
1033 package (Hijmans, 2020), we computed a linear interpolation across our temporal scenes to fill cloud removed  
1034 pixels, see Appendix 7 Fig. 3, for before and after interpolation maps and pixel histograms. We average our  
1035 temporal EVI scene to obtain an estimated seasonal measure of productivity. Using the 'raster.transformation'  
1036 function from the 'spatialEco' R package, we standardized the EVI annual productivity scene by subtracting the  
1037 scene mean from each pixel and dividing by the scene standard deviation (Evans, 2020).

1038

1039 **Elevation, Aspect, Slope and Land Cover:** A Canadian Digital Elevation Model (DEM) was retrieved from  
1040 Natural Resources Canada. Using ArcGIS, we combined DEM images together to create a seamless raster. In



1041 ArcGIS, using the ‘Clip’ function we limited our DEM raster to our AOI. Using the ‘terrain’ function from the  
1042 ‘raster’ R package we constructed aspect and slope raster. We normalized our aspect raster by replacing any value >  
1043 180 by subtracting -180 (e.g., an aspect of 240 is now an aspect of 60; changing the scale from 0-360 to 0-180). We  
1044 used the base R ‘subs’ function with a legend of corresponding values to normalize the aspect raster. As we did for  
1045 the EVI raster, we standardized elevation, aspect, and slope rasters using the ‘raster.transformation’ function from  
1046 the ‘spatialEco’ R package. In addition, we used the freely accessible Commission for Environmental Cooperation  
1047 Land Cover dataset; derived from Landsat images, to obtain categorical values of forest type: coniferous, deciduous,  
1048 mixed coniferous and deciduous.

1049  
1050 **Forest Resource Inventory:** our AOI covers a national park, Terra Nova National Park (TNNP) and public land.  
1051 Spatial information regarding forest stand attributes, Forest Resource Inventory (spatial vector), were supplied to us  
1052 from two sources: Parks Canada and the Provincial Government of Newfoundland and Labrador. Using unique  
1053 forest polygon identifiers, we attributed spatial covariates to the FRI datasets (attributes also contained non-interest  
1054 covariates). To construct a seamless FRI layer across our AOI we combined the two sets of Forest Resource  
1055 Inventory together. In ArcGIS, using the ‘clip’ function we constrained the geographic extents of the two FRI  
1056 datasets to our AOI; to alleviate spatial data processing time. Using the ‘erase’ function in ArcGIS we removed any  
1057 spatially overlapping boundaries between the two FRI datasets. Using the ‘merge’ ArcGIS function we create a  
1058 single FRI dataset by spatially joining the two FRI datasets together. In R, we subset the FRI dataset to only include  
1059 covariates of interest: forest stand age class, height class, and crown density – categorical properties that likely  
1060 influence growing conditions and thus the elemental and phytochemical properties of our plants. In R, we further  
1061 cleaned the FRI dataset by removing any non-intention ‘white space’ in the text of the categorical data. For each co-  
1062 variate we extracted unique values and re-coding text values as integers. Using the ‘rasterize’ function from the  
1063 ‘raster’ R package, we convert our FRI vector data into a raster for each co-covariate, using the integer values as a  
1064 coded legend for our categories. In addition, we created binary layers for each factor in the age class, height class,  
1065 and crown density variables. Binary layers were used when model average estimates were extracted as the predict  
1066 function in the ‘raster’ package is limited to single model objects.

1067 **Inference Mask:** Using species composition codes derived from the FRI dataset for each of our sample points, we  
1068 create a vector mask of forest polygons types for which we have spatial inference. These codes represent community  
1069 types dominated by either black spruce, white spruce, and white birch. In R, we used the ‘mask’ function from the  
1070 ‘raster’ package to clip spatial covariate surfaces.

1071

1072 **Spatial Data Extraction:** At each sample location, using the ‘extract’ function from the ‘raster’ R package we  
1073 spatially extracted pixel values from each of our raster datasets: elevation, aspect, slope, and land cover. We used  
1074 the ‘intersect’ function from the ‘raster’ R package to extract polygon forest stand attributes from the FRI dataset:  
1075 age class, height class, and crown density. At some sample locations the FRI was either inaccurate or our sample  
1076 location was within a wetland type area with no attributes. For these instances, we attributed our sample locations  
1077 with the values from the closest forest stand polygon. In total there were 14, 3, and 5 incorrect spatial designations  
1078 for age class, height class, and crown density.

1079 **Appendix 7**

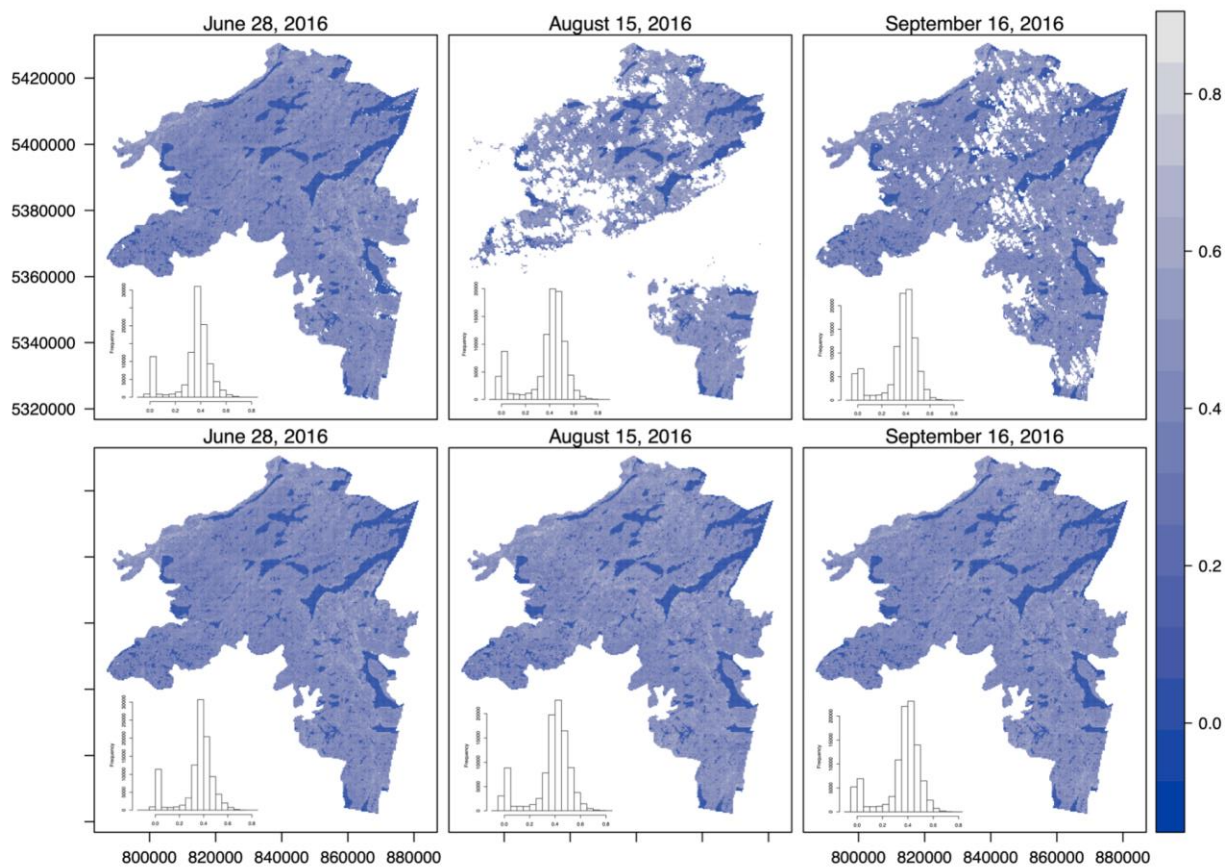

1080  
1081 **Figure A3.** Using the ‘approxNA’ function from the ‘raster’ package in R, we performed a linear temporal  
1082 interpolation to determine pixel values for areas of cloud cover for our three Enhanced Vegetation Index scenes,  
1083 June 28, August 15, and September 16, 2016. The top panel shows each scene before interpolation and the bottom  
1084 panel shows each scene after interpolation. Accompanying histograms are provided for each EVI scene,  
1085 demonstrating the change in pixel value distribution after interpolation.  
1086

1087 **Appendix 8**

1088 **Table A3.** AIC<sub>c</sub> results for foliar elemental (percent and quantity), stoichiometric, and phytochemical traits.

1089 Explanatory variables include land cover, EVI, biotic, and abiotic. Land cover is a categorical variable with three  
 1090 factor levels which include coniferous, deciduous, and mixed. EVI is the Enhanced Vegetation Index and performs  
 1091 better than NDVI (Normalized Difference Vegetation Index) under wet conditions. Our biotic variable represents  
 1092 forest structural conditions and is comprised of three variables, age class, height class, and canopy density, each  
 1093 containing four factors levels of increasing age, height, and canopy density. Abiotic is comprised of three continuous  
 1094 variables for elevation, aspect, and slope. Results are shown for models within 2 delta AIC<sub>c</sub>, K is the number of  
 1095 parameters, LL represents the model log likelihood, ΔAIC<sub>c</sub> for the interpretation of model ranking, ωAIC<sub>c</sub> for model  
 1096 weights, and R<sup>2</sup> is presented as Efron’s goodness of fit. Pretending variables are denoted with an asterisk and were  
 1097 removed from any model averaging. Biomass basis phytochemical models are identified with (bm).

| Species                            | Explanatory Variables                | K  | LL      | ΔAIC <sub>c</sub> | ωAIC <sub>c</sub> | R <sup>2</sup> |
|------------------------------------|--------------------------------------|----|---------|-------------------|-------------------|----------------|
| <b>Elemental: percent carbon</b>   |                                      |    |         |                   |                   |                |
| <b>ABBA</b>                        | Abiotic                              | 5  | -47.96  | 0.00              | 0.52              | 0.19           |
|                                    | EVI* + Abiotic                       | 6  | -47.36  | 1.08              | 0.31              | 0.20           |
| <b>ACRU</b>                        | Abiotic                              | 5  | -51.43  | 0.00              | 0.37              | 0.09           |
|                                    | EVI* + Abiotic                       | 6  | -50.54  | 0.52              | 0.28              | 0.11           |
| <b>BEPA</b>                        | Biotic                               | 10 | -72.14  | 0.00              | 0.48              | 0.31           |
| <b>PIMA</b>                        | Biotic + Abiotic                     | 14 | -202.13 | 0.00              | 0.38              | 0.64           |
|                                    | Land Cover + Biotic + Abiotic        | 16 | -199.88 | 0.42              | 0.31              | 0.65           |
| <b>VAAN</b>                        | Land Cover + Biotic + Abiotic        | 16 | -92.50  | 0.00              | 0.44              | 0.37           |
|                                    | Land Cover + EVI* + Biotic + Abiotic | 17 | -91.78  | 1.06              | 0.26              | 0.37           |
| <b>Elemental: percent nitrogen</b> |                                      |    |         |                   |                   |                |
| <b>ABBA</b>                        | Land Cover + EVI + Abiotic           | 8  | 48.53   | 0.00              | 0.62              | 0.29           |
| <b>ACRU</b>                        | Land Cover + Biotic                  | 13 | 20.02   | 0.00              | 0.36              | 0.36           |
|                                    | Land Cover + EVI* + Biotic           | 14 | 21.05   | 0.75              | 0.25              | 0.37           |

|                                      |                         |    |         |      |      |      |
|--------------------------------------|-------------------------|----|---------|------|------|------|
| <b>BEPA</b>                          | Intercept               | 2  | -45.13  | 0.00 | 0.41 | 0.00 |
|                                      | Abiotic                 | 5  | -42.47  | 1.43 | 0.20 | 0.07 |
|                                      | EVI                     | 3  | -44.96  | 1.85 | 0.16 | 0.00 |
| <b>PIMA</b>                          | EVI + Biotic            | 12 | 112.91  | 0.00 | 0.68 | 0.36 |
| <b>VAAN</b>                          | EVI                     | 3  | 33.08   | 0.00 | 0.45 | 0.07 |
|                                      | Land Cover + EVI        | 5  | 34.82   | 0.76 | 0.31 | 0.09 |
| <b>Elemental: percent phosphorus</b> |                         |    |         |      |      |      |
| <b>ABBA</b>                          | Abiotic                 | 5  | 199.02  | 0.00 | 0.52 | 0.10 |
| <b>ACRU</b>                          | EVI                     | 3  | 134.27  | 0.00 | 0.39 | 0.05 |
|                                      | EVI + Abiotic           | 6  | 136.95  | 1.35 | 0.20 | 0.10 |
| <b>BEPA</b>                          | Intercept               | 2  | 94.94   | 0.00 | 0.51 | 0.00 |
|                                      | EVI                     | 3  | 95.44   | 1.19 | 0.28 | 0.01 |
| <b>PIMA</b>                          | Biotic + Abiotic        | 14 | 345.69  | 0.00 | 0.42 | 0.28 |
|                                      | EVI* + Biotic + Abiotic | 15 | 346.63  | 0.57 | 0.32 | 0.29 |
| <b>VAAN</b>                          | EVI + Biotic            | 12 | 419.42  | 0.00 | 0.60 | 0.47 |
|                                      | Biotic                  | 11 | 417.36  | 1.78 | 0.25 | 0.46 |
| <b>Elemental: quantity carbon</b>    |                         |    |         |      |      |      |
| <b>ABBA</b>                          | Biotic + Abiotic        | 14 | -158.93 | 0.00 | 0.68 | 0.35 |
| <b>ACRU</b>                          | Intercept               | 2  | -190.97 | 0.00 | 0.60 | 0.00 |
|                                      | EVI                     | 3  | -190.84 | 1.87 | 0.23 | 0.00 |
| <b>BEPA</b>                          | Intercept               | 2  | 10.10   | 0.00 | 0.60 | 0.00 |
| <b>PIMA</b>                          | Intercept               | 2  | -497.69 | 0.00 | 0.43 | 0.00 |
|                                      | Abiotic                 | 5  | -495.20 | 1.34 | 0.22 | 0.03 |
| <b>VAAN</b>                          | Land Cover + Abiotic    | 7  | -444.06 | 0.00 | 0.56 | 0.19 |
| <b>Elemental: quantity nitrogen</b>  |                         |    |         |      |      |      |
| <b>ABBA</b>                          | Biotic + Abiotic        | 14 | 227.46  | 0.00 | 0.68 | 0.35 |

|                                       |                             |    |         |      |      |      |
|---------------------------------------|-----------------------------|----|---------|------|------|------|
| <b>ACRU</b>                           | Intercept                   | 2  | 121.64  | 0.00 | 0.58 | 0.00 |
|                                       | EVI                         | 3  | 121.87  | 1.67 | 0.25 | 0.01 |
| <b>BEPA</b>                           | Intercept                   | 2  | 251.05  | 0.00 | 0.62 | 0.00 |
| <b>PIMA</b>                           | Intercept                   | 2  | 146.79  | 0.00 | 0.38 | 0.00 |
|                                       | Abiotic                     | 5  | 149.56  | 0.79 | 0.25 | 0.03 |
|                                       | EVI                         | 3  | 146.97  | 1.74 | 0.16 | 0.00 |
| <b>VAAN</b>                           | Land Cover + Abiotic        | 7  | 166.00  | 0.00 | 0.54 | 0.18 |
|                                       | Land Cover + EVI* + Abiotic | 8  | 166.19  | 1.84 | 0.22 | 0.19 |
| <b>Elemental: quantity phosphorus</b> |                             |    |         |      |      |      |
| <b>ABBA</b>                           | Biotic + Abiotic            | 14 | 449.29  | 0.00 | 0.53 | 0.32 |
| <b>ACRU</b>                           | Intercept                   | 2  | 334.15  | 0.00 | 0.61 | 0.00 |
|                                       | EVI                         | 3  | 334.24  | 1.96 | 0.23 | 0.00 |
| <b>BEPA</b>                           | Intercept                   | 2  | 433.74  | 0.00 | 0.62 | 0.00 |
| <b>PIMA</b>                           | Intercept                   | 2  | 470.41  | 0.00 | 0.48 | 0.00 |
| <b>VAAN</b>                           | Land Cover + Abiotic        | 7  | 581.16  | 0.00 | 0.72 | 0.19 |
| <b>Stoichiometric: C:N ratio</b>      |                             |    |         |      |      |      |
| <b>ABBA</b>                           | Land Cover + EVI + Abiotic  | 8  | -364.16 | 0.00 | 0.72 | 0.31 |
| <b>ACRU</b>                           | Land Cover + Biotic         | 13 | -267.39 | 0.00 | 0.40 | 0.39 |
|                                       | Land Cover + EVI* + Biotic  | 14 | -266.49 | 0.99 | 0.24 | 0.40 |
| <b>BEPA</b>                           | Intercept                   | 2  | -291.69 | 0.00 | 0.48 | 0.00 |
|                                       | EVI                         | 3  | -291.22 | 1.25 | 0.26 | 0.01 |
| <b>PIMA</b>                           | EVI + Biotic                | 12 | -559.84 | 0.00 | 0.70 | 0.38 |
| <b>VAAN</b>                           | EVI                         | 3  | -539.51 | 0.00 | 0.44 | 0.09 |
|                                       | Land Cover + EVI            | 5  | -537.79 | 0.79 | 0.30 | 0.11 |
| <b>Stoichiometric: C:P ratio</b>      |                             |    |         |      |      |      |
| <b>ABBA</b>                           | Abiotic                     | 5  | -755.06 | 0.00 | 0.63 | 0.14 |

|                                     |                                     |    |          |      |      |      |
|-------------------------------------|-------------------------------------|----|----------|------|------|------|
| <b>ACRU</b>                         | Abiotic                             | 5  | -665.73  | 0.00 | 0.26 | 0.07 |
|                                     | Intercept                           | 2  | -669.06  | 0.07 | 0.25 | 0.00 |
|                                     | EVI + Abiotic                       | 6  | -664.89  | 0.61 | 0.19 | 0.09 |
|                                     | EVI                                 | 3  | -668.32  | 0.75 | 0.18 | 0.02 |
| <b>BEPA</b>                         | Intercept                           | 2  | -568.29  | 0.00 | 0.49 | 0.00 |
|                                     | EVI                                 | 3  | -567.62  | 0.85 | 0.32 | 0.02 |
| <b>PIMA</b>                         | Biotic + Abiotic                    | 14 | -1095.54 | 0.00 | 0.59 | 0.30 |
|                                     | EVI* + Biotic + Abiotic             | 15 | -1095.19 | 1.75 | 0.25 | 0.30 |
| <b>VAAN</b>                         | Biotic                              | 11 | -1189.78 | 0.00 | 0.40 | 0.33 |
|                                     | EVI + Biotic                        | 12 | -1188.63 | 0.03 | 0.39 | 0.34 |
| <b>Stoichiometric: N:P ratio</b>    |                                     |    |          |      |      |      |
| <b>ABBA</b>                         | Abiotic                             | 5  | -331.11  | 0.00 | 0.31 | 0.08 |
|                                     | EVI + Abiotic                       | 6  | -330.06  | 0.18 | 0.28 | 0.10 |
|                                     | Intercept                           | 2  | -334.87  | 0.99 | 0.19 | 0.00 |
| <b>ACRU</b>                         | EVI + Abiotic                       | 6  | -324.45  | 0.00 | 0.54 | 0.17 |
| <b>BEPA</b>                         | Intercept                           | 2  | -245.07  | 0.00 | 0.44 | 0.00 |
|                                     | EVI                                 | 3  | -244.16  | 0.36 | 0.37 | 0.03 |
| <b>PIMA</b>                         | EVI + Biotic + Abiotic              | 15 | -410.79  | 0.00 | 0.73 | 0.31 |
| <b>VAAN</b>                         | EVI + Biotic + Abiotic              | 15 | -541.26  | 0.00 | 0.32 | 0.41 |
|                                     | EVI + Biotic                        | 12 | -544.89  | 0.04 | 0.31 | 0.39 |
|                                     | Land Cover + EVI + Biotic + Abiotic | 17 | -539.24  | 0.94 | 0.20 | 0.43 |
|                                     | Land Cover + EVI + Biotic           | 14 | -543.20  | 1.44 | 0.15 | 0.40 |
| <b>Phytochemical: terpene (raw)</b> |                                     |    |          |      |      |      |
| <b>ABBA</b>                         | EVI                                 | 3  | -269.49  | 0.00 | 0.52 | 0.05 |
| <b>PIMA</b>                         | EVI + Biotic + Abiotic              | 15 | -471.87  | 0.00 | 0.47 | 0.27 |
|                                     | Biotic + Abiotic                    | 14 | -473.22  | 0.28 | 0.41 | 0.26 |

| <b>Phytochemical: terpene (bm)</b>               |                      |    |          |      |      |      |
|--------------------------------------------------|----------------------|----|----------|------|------|------|
| <b>ABBA</b>                                      | Biotic + Abiotic     | 14 | -516.39  | 0.00 | 0.54 | 0.27 |
| <b>PIMA</b>                                      | Intercept            | 2  | -1126.03 | 0.00 | 0.40 | 0.00 |
|                                                  | Abiotic              | 5  | -1123.40 | 1.05 | 0.24 | 0.03 |
|                                                  | EVI                  | 3  | -1125.99 | 2.00 | 0.15 | 0.00 |
| <b>Phytochemical: monoterpene (raw)</b>          |                      |    |          |      |      |      |
| <b>ABBA</b>                                      | EVI + Abiotic        | 6  | -229.81  | 0.00 | 0.44 | 0.12 |
|                                                  | Abiotic              | 5  | -231.81  | 1.75 | 0.18 | 0.08 |
|                                                  | EVI                  | 3  | -234.08  | 1.93 | 0.17 | 0.04 |
| <b>PIMA</b>                                      | Biotic + Abiotic     | 14 | -290.67  | 0.00 | 0.67 | 0.24 |
| <b>Phytochemical: monoterpene (bm)</b>           |                      |    |          |      |      |      |
| <b>ABBA</b>                                      | Biotic + Abiotic     | 14 | -461.32  | 0.00 | 0.57 | 0.27 |
| <b>PIMA</b>                                      | Intercept            | 2  | -944.97  | 0.00 | 0.41 | 0.00 |
|                                                  | Abiotic              | 5  | -942.37  | 1.12 | 0.23 | 0.03 |
| <b>Phytochemical: monoterpenic alcohol (raw)</b> |                      |    |          |      |      |      |
| <b>ABBA</b>                                      | Land Cover           | 4  | 42.49    | 0.00 | 0.26 | 0.05 |
|                                                  | Intercept            | 2  | 40.04    | 0.61 | 0.19 | 0.00 |
|                                                  | Land Cover + EVI     | 5  | 43.01    | 1.17 | 0.15 | 0.06 |
|                                                  | Land Cover + Abiotic | 7  | 45.16    | 1.42 | 0.13 | 0.09 |
|                                                  | Abiotic              | 5  | 42.64    | 1.90 | 0.10 | 0.05 |
| <b>PIMA</b>                                      | Biotic + Abiotic     | 14 | 149.34   | 0.00 | 0.53 | 0.23 |
| <b>Phytochemical: monoterpenic alcohol (bm)</b>  |                      |    |          |      |      |      |
| <b>ABBA</b>                                      | Intercept            | 2  | -179.59  | 0.00 | 0.30 | 0.00 |
|                                                  | EVI                  | 3  | -178.87  | 0.67 | 0.21 | 0.01 |
|                                                  | Biotic + Abiotic     | 14 | -165.76  | 0.94 | 0.19 | 0.23 |
| <b>PIMA</b>                                      | Intercept            | 2  | -487.60  | 0.00 | 0.42 | 0.00 |



|                                               |                            |    |         |      |      |      |
|-----------------------------------------------|----------------------------|----|---------|------|------|------|
|                                               | Abiotic                    | 5  | -485.08 | 1.27 | 0.22 | 0.03 |
|                                               | EVI                        | 3  | -487.49 | 1.86 | 0.16 | 0.00 |
| <b>Phytochemical: monoterpene ester (raw)</b> |                            |    |         |      |      |      |
| <b>ABBA</b>                                   | Intercept                  | 2  | -115.95 | 0.00 | 0.21 | 0.00 |
|                                               | Land Cover                 | 4  | -113.88 | 0.13 | 0.19 | 0.04 |
|                                               | Land Cover + EVI           | 5  | -112.80 | 0.19 | 0.19 | 0.06 |
|                                               | Abiotic                    | 5  | -113.31 | 1.22 | 0.11 | 0.05 |
|                                               | EVI                        | 3  | -115.73 | 1.67 | 0.09 | 0.00 |
| <b>PIMA</b>                                   | Biotic + Abiotic           | 14 | -310.53 | 0.00 | 0.57 | 0.27 |
|                                               | EVI* + Biotic + Abiotic    | 15 | -309.93 | 1.23 | 0.31 | 0.27 |
| <b>Phytochemical: monoterpene ester (bm)</b>  |                            |    |         |      |      |      |
| <b>ABBA</b>                                   | Biotic + Abiotic           | 14 | -332.19 | 0.00 | 0.47 | 0.27 |
| <b>PIMA</b>                                   | Intercept                  | 2  | -926.76 | 0.00 | 0.42 | 0.00 |
|                                               | Abiotic                    | 5  | -924.24 | 1.26 | 0.22 | 0.03 |
| <b>Phytochemical: sesquiterpene (raw)</b>     |                            |    |         |      |      |      |
| <b>ABBA</b>                                   | EVI + Abiotic              | 6  | -61.73  | 0.00 | 0.33 | 0.10 |
|                                               | EVI                        | 3  | -65.31  | 0.54 | 0.25 | 0.04 |
|                                               | Abiotic                    | 5  | -63.51  | 1.31 | 0.17 | 0.07 |
| <b>PIMA</b>                                   | Land Cover + EVI + Abiotic | 8  | 4.46    | 0.00 | 0.28 | 0.12 |
|                                               | Abiotic                    | 5  | 0.93    | 0.50 | 0.22 | 0.08 |
|                                               | EVI + Biotic + Abiotic     | 15 | 11.98   | 1.29 | 0.15 | 0.19 |
|                                               | EVI + Abiotic              | 6  | 1.53    | 1.45 | 0.13 | 0.08 |
| <b>Phytochemical: sesquiterpene (bm)</b>      |                            |    |         |      |      |      |
| <b>ABBA</b>                                   | EVI                        | 3  | -284.44 | 0.00 | 0.23 | 0.02 |
|                                               | Biotic + Abiotic           | 14 | -271.25 | 0.08 | 0.22 | 0.24 |
|                                               | Intercept                  | 2  | -285.69 | 0.36 | 0.19 | 0.00 |

|                                 |               |    |         |      |      |      |
|---------------------------------|---------------|----|---------|------|------|------|
| <b>PIMA</b>                     | Intercept     | 2  | -566.61 | 0.00 | 0.38 | 0.00 |
|                                 | Abiotic       | 5  | -563.89 | 0.86 | 0.25 | 0.03 |
|                                 | EVI           | 3  | -566.55 | 1.95 | 0.15 | 0.00 |
| <b>Phytochemical: diversity</b> |               |    |         |      |      |      |
| <b>ABBA</b>                     | Abiotic       | 5  | 113.25  | 0.00 | 0.31 | 0.06 |
|                                 | Intercept     | 2  | 109.95  | 0.11 | 0.30 | 0.00 |
|                                 | EVI           | 3  | 110.17  | 1.79 | 0.13 | 0.00 |
|                                 | EVI + Abiotic | 6  | 113.45  | 1.85 | 0.12 | 0.07 |
| <b>PIMA</b>                     | Land Cover    | 4  | 189.24  | 0.00 | 0.31 | 0.04 |
|                                 | Biotic        | 11 | 196.43  | 1.11 | 0.18 | 0.12 |
|                                 | EVI           | 3  | 187.20  | 1.98 | 0.11 | 0.02 |

1098

1099

1100 **Appendix 9**

1101 **Table A4.** Shows the coefficient sign (+/-) for all for top ranked models. Top models are presented in order of rank  
 1102 with Efron pseudo R<sup>2</sup> presented in the last column. We use red coloured coefficients signs to indicate statistical  
 1103 significance at alpha =0.05. For land cover, Decid, and Mix indicate, deciduous, and mixed cover types respectively.  
 1104 EVI represents the Enhanced Vegetation Index. For biotic variables, AC indicates age class with 3, 4, 5 representing  
 1105 factor levels of 41-60, 61-80, and 81-100 years, respectively. HC indicates height class with 3, 4, 5 representing  
 1106 factor levels of 6.6-9.5, 9.6-12.5, 12.6-15.5 metres, respectively. CD indicates canopy density with 2, 3, 4  
 1107 representing factor levels of 51-75, 26-50, 10-25 percent closed. For abiotic variables, E, A, and S represent  
 1108 elevation, aspect, and slope, respectively.

| Species                     | Land cover |     | Prod | Biotic factors |     |     |     |     |     |     |     |     | Abiotic factors |   |   | R <sup>2</sup> |
|-----------------------------|------------|-----|------|----------------|-----|-----|-----|-----|-----|-----|-----|-----|-----------------|---|---|----------------|
|                             | Decid      | Mix | EVI  | AC3            | AC4 | AC5 | HC3 | HC4 | HC5 | CD2 | CD3 | CD4 | E               | A | S |                |
| Elemental: percent carbon   |            |     |      |                |     |     |     |     |     |     |     |     |                 |   |   |                |
| ABBA                        |            |     |      |                |     |     |     |     |     |     |     |     | +               | - | + | 0.19           |
| ACRU                        |            |     |      |                |     |     |     |     |     |     |     |     | -               | - | - | 0.09           |
| BEPA                        |            |     |      | +              | +   | +   | -   | -   | -   | -   | -   |     |                 |   |   | 0.31           |
| PIMA                        |            |     |      | +              | +   | +   | -   | -   | -   | +   | -   | -   | +               | + | + | 0.64           |
| PIMA                        | -          | -   |      | +              | +   | +   | -   | -   | -   | +   | -   | -   | +               | + | + | 0.65           |
| VAAN                        | -          | -   |      | +              | +   | +   | -   | -   | -   | -   | +   | +   | +               | - | + | 0.37           |
| Elemental: percent nitrogen |            |     |      |                |     |     |     |     |     |     |     |     |                 |   |   |                |
| ABBA                        | -          | -   | +    |                |     |     |     |     |     |     |     |     | -               | + | + | 0.29           |
| ACRU                        | -          | -   |      | -              | -   | -   | +   | +   | +   | -   | -   | -   |                 |   |   | 0.36           |
| PIMA                        |            |     | +    | -              | -   | -   | +   | +   | +   | +   | +   | +   |                 |   |   | 0.36           |
| VAAN                        |            |     | +    |                |     |     |     |     |     |     |     |     |                 |   |   | 0.07           |
| VAAN                        | -          | -   | +    |                |     |     |     |     |     |     |     |     |                 |   |   | 0.09           |

| Elemental: percent phosphorus  |   |   |   |   |   |   |   |   |   |   |   |   |   |   |   |   |   |      |
|--------------------------------|---|---|---|---|---|---|---|---|---|---|---|---|---|---|---|---|---|------|
| ABBA                           |   |   |   |   |   |   |   |   |   |   |   |   |   |   | + | + | + | 0.1  |
| ACRU                           |   |   | + |   |   |   |   |   |   |   |   |   |   |   |   |   |   | 0.05 |
| ACRU                           |   |   | - |   |   |   |   |   |   |   |   |   |   |   | + | + | + | 0.1  |
| PIMA                           |   |   |   | - | - | - | + | + | + | + | + | - |   |   | + | + | + | 0.28 |
| VAAN                           |   |   | - | - | - | - | - | - | + | - | - | - |   |   |   |   |   | 0.47 |
| VAAN                           |   |   |   | - | - | - | - | - | - | + | - | - |   |   |   |   |   | 0.46 |
| Elemental: quantity carbon     |   |   |   |   |   |   |   |   |   |   |   |   |   |   |   |   |   |      |
| ABBA                           |   |   |   | - | - | - | - | - | - | - | + | + | + | - | + |   |   | 0.35 |
| VAAN                           | + | + |   |   |   |   |   |   |   |   |   |   |   |   | + | + | - | 0.19 |
| Elemental: quantity nitrogen   |   |   |   |   |   |   |   |   |   |   |   |   |   |   |   |   |   |      |
| ABBA                           |   |   |   | - | - | - | - | - | - | - | + | + | + | - | + |   |   | 0.35 |
| VAAN                           | + | + |   |   |   |   |   |   |   |   |   |   |   |   | + | + | - | 0.18 |
| Elemental: quantity phosphorus |   |   |   |   |   |   |   |   |   |   |   |   |   |   |   |   |   |      |
| ABBA                           |   |   |   | - | - | - | - | - | - | + | + | + | + | + | + | + |   | 0.32 |
| VAAN                           | + | + |   |   |   |   |   |   |   |   |   |   |   |   | + | + | - | 0.19 |
| Stoichiometric: C:N ratio      |   |   |   |   |   |   |   |   |   |   |   |   |   |   |   |   |   |      |
| ABBA                           | + | + | - |   |   |   |   |   |   |   |   |   |   |   | + | - | - | 0.31 |
| ACRU                           | + | + |   | + | + | + | - | - | - | + | + | + |   |   |   |   |   | 0.39 |
| PIMA                           |   |   | - | + | + | + | - | - | - | - | - | - |   |   |   |   |   | 0.38 |
| VAAN                           |   |   | - |   |   |   |   |   |   |   |   |   |   |   |   |   |   | 0.09 |
| VAAN                           | + | + | - |   |   |   |   |   |   |   |   |   |   |   |   |   |   | 0.11 |
| Stoichiometric: C:P ratio      |   |   |   |   |   |   |   |   |   |   |   |   |   |   |   |   |   |      |

|                                  |   |   |   |   |   |   |   |   |   |   |   |   |   |   |   |      |      |
|----------------------------------|---|---|---|---|---|---|---|---|---|---|---|---|---|---|---|------|------|
| ABBA                             |   |   |   |   |   |   |   |   |   |   |   |   |   | + | - | -    | 0.14 |
| *ACRU                            |   |   |   |   |   |   |   |   |   |   |   |   |   | - | - | -    | 0.07 |
| PIMA                             |   |   |   | + | + | + | - | - | - | - | - | + | - | - | - | 0.3  |      |
| VAAN                             |   |   |   | + | + | + | + | + | - | - | + | + |   |   |   | 0.33 |      |
| VAAN                             |   |   | + | + | + | + | + | + | - | - | + | + |   |   |   | 0.34 |      |
| Stoichiometric: N:P ratio        |   |   |   |   |   |   |   |   |   |   |   |   |   |   |   |      |      |
| *ABBA                            |   |   |   |   |   |   |   |   |   |   |   |   |   | - | - | -    | 0.08 |
| *ABBA                            |   |   | + |   |   |   |   |   |   |   |   |   |   | - | - | -    |      |
| ACRU                             |   |   | + |   |   |   |   |   |   |   |   |   |   | - | - | -    | 0.17 |
| PIMA                             |   |   | + | + | + | + | - | + | - | + | - | + | - | - | - | 0.31 |      |
| VAAN                             |   |   | + | + | + | + | - | + | - | - | - | - | - | - | - | +    | 0.41 |
| VAAN                             |   |   | + | + | + | + | - | + | - | - | - | + |   |   |   |      | 0.39 |
| VAAN                             | - | - | + | + | + | + | - | + | - | - | - | + | - | - | + |      | 0.43 |
| VAAN                             | - | - | + | + | + | + | - | + | - | - | - | + |   |   |   |      | 0.4  |
| Phytochemical: terpene (raw)     |   |   |   |   |   |   |   |   |   |   |   |   |   |   |   |      |      |
| ABBA                             |   |   | + |   |   |   |   |   |   |   |   |   |   |   |   |      | 0.05 |
| PIMA                             |   |   | - | + | + | + | - | - | - | + | + | + | - | - | - |      | 0.27 |
| PIMA                             |   |   |   | + | + | + | - | - | - | + | + | + | - | - | - |      | 0.26 |
| Phytochemical: terpene (bm)      |   |   |   |   |   |   |   |   |   |   |   |   |   |   |   |      |      |
| ABBA                             |   |   |   | - | - | - | - | - | - | + | + | + | + | - | + |      | 0.27 |
| Phytochemical: monoterpene (raw) |   |   |   |   |   |   |   |   |   |   |   |   |   |   |   |      |      |
| ABBA                             |   |   | + |   |   |   |   |   |   |   |   |   |   | + | - | +    | 0.12 |
| ABBA                             |   |   |   |   |   |   |   |   |   |   |   |   |   | + | - | +    | 0.08 |

|                                          |   |   |   |   |   |   |   |   |   |   |   |   |   |   |   |  |      |
|------------------------------------------|---|---|---|---|---|---|---|---|---|---|---|---|---|---|---|--|------|
| ABBA                                     |   |   | + |   |   |   |   |   |   |   |   |   |   |   |   |  | 0.04 |
| PIMA                                     |   |   |   | + | + | + | - | - | - | + | + | + | - | - | - |  | 0.24 |
| Phytochemical: monoterpene (bm)          |   |   |   |   |   |   |   |   |   |   |   |   |   |   |   |  |      |
| ABBA                                     |   |   |   | - | - | - | - | - | - | + | + | + | + | - | + |  | 0.27 |
| Phytochemical: monoterpene alcohol (raw) |   |   |   |   |   |   |   |   |   |   |   |   |   |   |   |  |      |
| *ABBA                                    | + | + |   |   |   |   |   |   |   |   |   |   |   |   |   |  | 0.05 |
| PIMA                                     |   |   |   | + | + | + | - | - | - | + | + | + | - | - | - |  | 0.23 |
| Phytochemical: monoterpene ester (raw)   |   |   |   |   |   |   |   |   |   |   |   |   |   |   |   |  |      |
| PIMA                                     |   |   |   | + | + | + | - | - | - | + | + | + | - | - | - |  | 0.27 |
| Phytochemical: monoterpene ester (bm)    |   |   |   |   |   |   |   |   |   |   |   |   |   |   |   |  |      |
| ABBA                                     |   |   |   | - | - | - | - | - | - | + | + | + | + | - | + |  | 0.27 |
| Phytochemical: sesquiterpene (raw)       |   |   |   |   |   |   |   |   |   |   |   |   |   |   |   |  |      |
| ABBA                                     |   |   | + |   |   |   |   |   |   |   |   |   | - | - | - |  | 0.1  |
| ABBA                                     |   |   | + |   |   |   |   |   |   |   |   |   |   |   |   |  | 0.04 |
| ABBA                                     |   |   |   |   |   |   |   |   |   |   |   |   | - | - | - |  | 0.07 |
| PIMA                                     | - | + | - |   |   |   |   |   |   |   |   |   | - | - | - |  | 0.12 |
| PIMA                                     |   |   |   |   |   |   |   |   |   |   |   |   | - | - | - |  | 0.08 |
| PIMA                                     |   |   | - | + | - | + | - | - | - | - | - | + | - | + | - |  | 0.19 |
| PIMA                                     |   |   | - |   |   |   |   |   |   |   |   |   | - | - | - |  | 0.08 |
| Phytochemical: sesquiterpene (bm)        |   |   |   |   |   |   |   |   |   |   |   |   |   |   |   |  |      |
| *ABBA                                    |   |   | + |   |   |   |   |   |   |   |   |   |   |   |   |  | 0.02 |
| *ABBA                                    |   |   |   | - | - | - | - | - | - | + | + | + | + | - | + |  | 0.24 |
| Phytochemical: diversity                 |   |   |   |   |   |   |   |   |   |   |   |   |   |   |   |  |      |

|       |   |   |   |   |   |   |   |   |   |   |   |   |  |   |   |   |      |
|-------|---|---|---|---|---|---|---|---|---|---|---|---|--|---|---|---|------|
| *ABBA |   |   |   |   |   |   |   |   |   |   |   |   |  | - | - | + | 0.06 |
| PIMA  | + | + |   |   |   |   |   |   |   |   |   |   |  |   |   |   | 0.04 |
| PIMA  |   |   |   | - | - | - | - | + | + | - | - | - |  |   |   |   | 0.12 |
| PIMA  |   |   | + |   |   |   |   |   |   |   |   |   |  |   |   |   | 0.02 |

1109

1110 **Appendix 10**

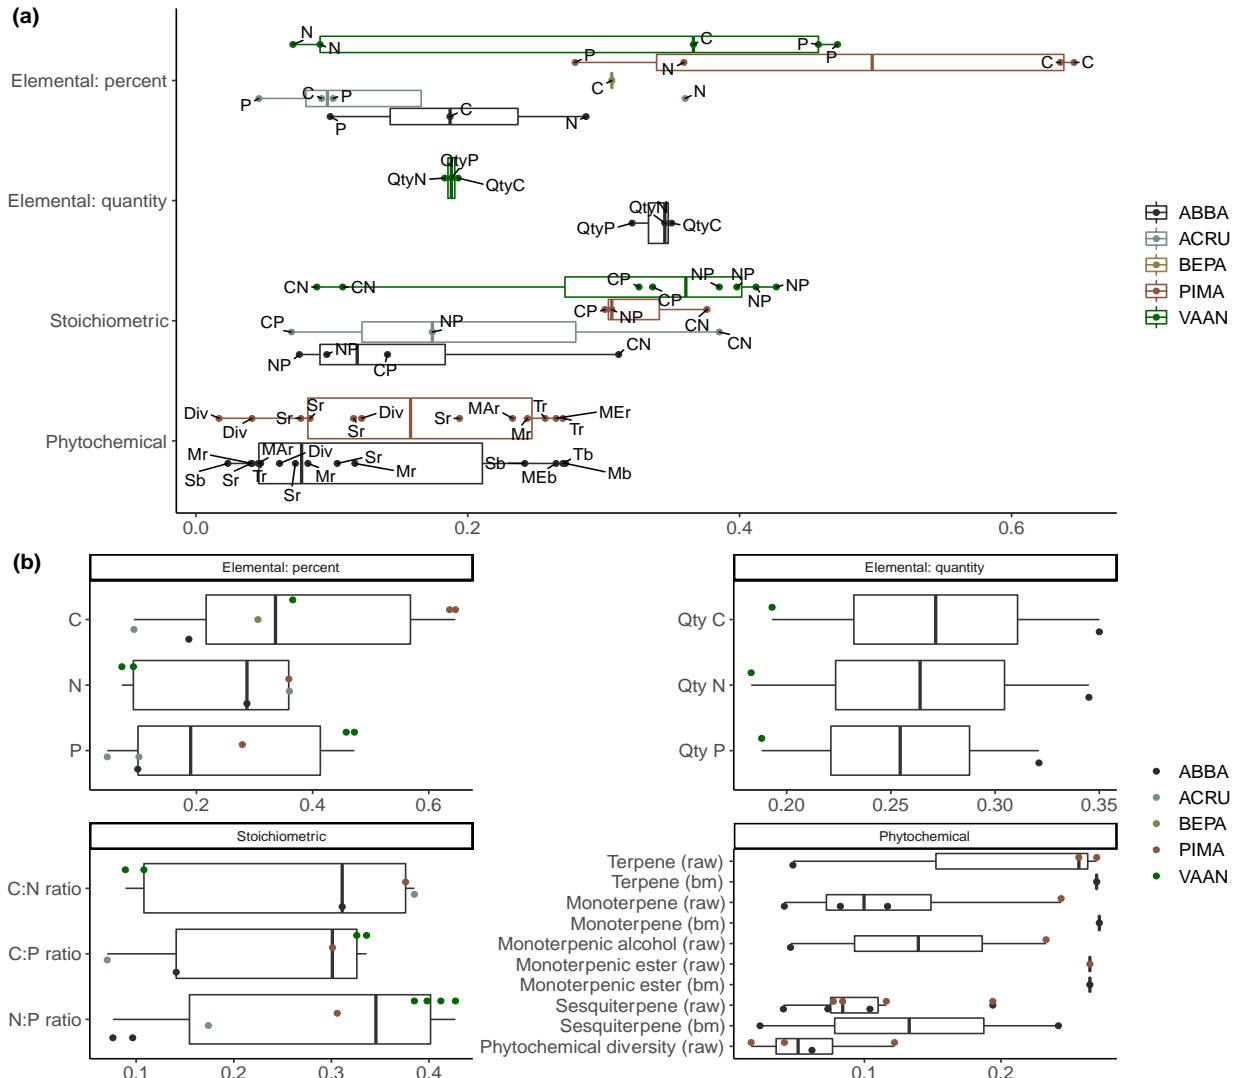

1111  
 1112 **Figure A4.** Distribution of pseudo  $R^2$  values across species, at the trait type level (a) and at the trait level (b), for all  
 1113 top ranked models. At trait type level, we show pseudo  $R^2$  values for element percent and quantity, stoichiometric,  
 1114 and phytochemical traits. At the trait level we show individual traits of percent elemental (i.e., %C, %N, and %P),  
 1115 quantity elemental (i.e., C, N, and P on a g/m<sup>2</sup> biomass basis), stoichiometric ratios (i.e., C:N, C:P, and N:P), and  
 1116 phytochemical groups (terpene, monoterpene, monoterpenic alcohol, monoterpenic ester, sesquiterpene, and  
 1117 phytochemical diversity) on a raw of biomass basis, indicated as either (raw) or (bm) suffixes, respectively. Species  
 1118 bar and point colours are the same between plots. In addition, labels are provided in (a) to identify individual traits  
 1119 for a given species within a trait type.



1120 *Appendix 11*

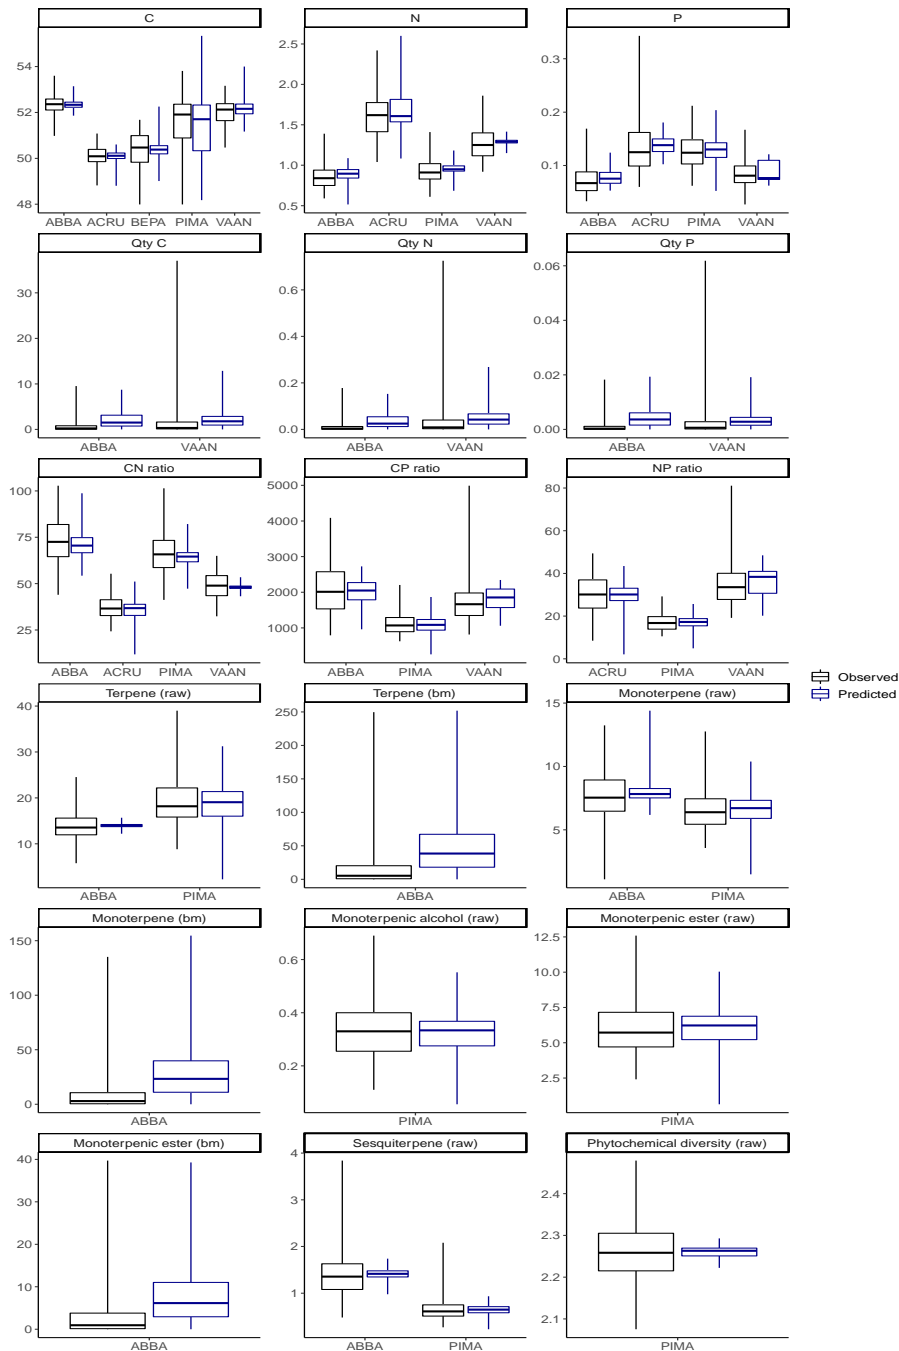

1121  
1122 **Figure A5.** Comparison of observed (data) and predicted (raster values) data for foliar elemental, stoichiometric,  
1123 and phytochemical traits for each of our study species where a plausible explanation was determined. Generally,  
1124 medians are consistent between observed and predicted data, however, ranges differ with predicted often having a  
1125 larger variance.

1126 **Appendix 12**

1127 **Table A5.** Foliar percent carbon trait coefficient estimates, confidence intervals, and standard error values for top ranked models (< 2 ΔAIC<sub>c</sub>). Species codes are  
 1128 used for balsam fir (ABBA), red maple (ACRU), white birch (BEPA), black spruce (PIMA), and lowbush blueberry (VAAN). If there is more than one top ranked  
 1129 model per species, we present in order of ΔAIC<sub>c</sub> rank. Model numbers are supplied beside the species code in the top row (see Table 1 for model descriptions).  
 1130 Predictors include land cover (LandCover5 and LandCover6 represent deciduous and mix wood conditions), EVI (i.e., proxy for productivity), abiotic factors  
 1131 (aspect, slope, elevation), and biotic factors: AgeClss3 (41-60 years old), AgeClss 4 (61-80 years old), AgeClss5 (81-100 years old), HghtCls3 (6.6 -9.5 m),  
 1132 HghtCls4 (9.6-12.5 m), HghtCls5 (12.6-15.5m), CrwnDns2 (51-75 % closed), CrwnDns3 (26-50%), CrwnDn4 (10-25 % closed). Total number of observations  
 1133 are provided in the bottom row. In addition, asterisks are used to indicate coefficient significance as follows: \*  $p < 0.05$  \*\*  $p < 0.01$  \*\*\*  $p < 0.001$ .

|                   | <b>ABBA 15</b>                       | <b>ABBA 9</b>                         | <b>ACRU 15</b>                        | <b>ACRU 9</b>                        | <b>BEPA 14</b>                        | <b>PIMA 10</b>                        | <b>PIMA 3</b>                        | <b>VAAN 3</b>                        | <b>VAAN 1</b>                        |
|-------------------|--------------------------------------|---------------------------------------|---------------------------------------|--------------------------------------|---------------------------------------|---------------------------------------|--------------------------------------|--------------------------------------|--------------------------------------|
| <i>Predictors</i> |                                      |                                       |                                       |                                      |                                       |                                       |                                      |                                      |                                      |
| Intercept         | 52.33 ***<br>(52.24-52.41)<br>(0.04) | 52.33 ***<br>(52.24 -52.41)<br>(0.04) | 50.12 ***<br>(50.03 -50.21)<br>(0.05) | 50.12 ***<br>(50.03-50.21)<br>(0.05) | 51.00 ***<br>(50.08 -51.93)<br>(0.47) | 49.93 ***<br>(49.16 -50.70)<br>(0.39) | 50.40 ***<br>(49.50-51.29)<br>(0.46) | 52.45 ***<br>(51.97-52.93)<br>(0.24) | 52.50 ***<br>(52.01-52.98)<br>(0.25) |
| Aspect            | -0.09<br>(-0.19-0.01)<br>(0.05)      | -0.10<br>(-0.20-0.01)<br>(0.05)       | -0.08<br>(-0.18-0.03)<br>(0.06)       | -0.08<br>(-0.19-0.03)<br>(0.06)      |                                       | 0.14<br>(-0.07-0.35)<br>(0.11)        | 0.16<br>(-0.05-0.37)<br>(0.11)       | -0.05<br>(-0.15-0.05)<br>(0.05)      | -0.05<br>(-0.15-0.05)<br>(0.05)      |

|           |              |              |               |               |              |             |             |              |              |
|-----------|--------------|--------------|---------------|---------------|--------------|-------------|-------------|--------------|--------------|
| Slope     | 0.07         | 0.06         | -0.11 *       | -0.12 *       |              | 0.24 *      | 0.28 **     | 0.16 **      | 0.17 **      |
|           | (-0.03-0.18) | (-0.04-0.17) | (-0.22--0.00) | (-0.23--0.01) |              | (0.04-0.44) | (0.08-0.49) | (0.06-0.27)  | (0.06-0.27)  |
|           | (0.05)       | (0.05)       | (0.05)        | (0.06)        |              | (0.10)      | (0.10)      | (0.05)       | (0.05)       |
| Elevation | 0.14 **      | 0.14 **      | -0.16 **      | -0.15 **      |              | 0.28 **     | 0.26 *      | 0.08         | 0.06         |
|           | (0.04-0.25)  | (0.04-0.25)  | (-0.26--0.05) | (-0.26--0.05) |              | (0.08-0.48) | (0.06-0.46) | (-0.02-0.17) | (-0.04-0.16) |
|           | (0.05)       | (0.05)       | (0.05)        | (0.05)        |              | (0.10)      | (0.10)      | (0.05)       | (0.05)       |
| EVI       |              | 0.05         |               | 0.06          |              |             |             |              | -0.06        |
|           |              | (-0.04-0.13) |               | (-0.03-0.15)  |              |             |             |              | (-0.17-0.04) |
|           |              | (0.04)       |               | (0.05)        |              |             |             |              | (0.05)       |
| AgeClss3  |              |              |               |               | 1.25 ***     | 2.03 ***    | 1.97 ***    | 0.34         | 0.30         |
|           |              |              |               |               | (0.62-1.88)  | (1.28-2.79) | (1.21-2.73) | (-0.04-0.72) | (-0.09-0.69) |
|           |              |              |               |               | (0.32)       | (0.39)      | (0.39)      | (0.20)       | (0.20)       |
| AgeClss4  |              |              |               |               | 0.71         | 2.97 ***    | 2.52 ***    | 0.08         | -0.06        |
|           |              |              |               |               | (-0.14-1.55) | (2.18-3.77) | (1.61-3.42) | (-0.39-0.56) | (-0.59-0.47) |
|           |              |              |               |               | (0.43)       | (0.41)      | (0.46)      | (0.24)       | (0.27)       |
| AgeClss5  |              |              |               |               | 0.78         | 2.54 ***    | 2.37 ***    | 0.27         | 0.20         |
|           |              |              |               |               | (0.00-1.56)  | (1.89-3.18) | (1.71-3.03) | (-0.05-0.59) | (-0.14-0.55) |
|           |              |              |               |               | (0.40)       | (0.33)      | (0.34)      | (0.17)       | (0.18)       |

|          |               |               |              |               |               |
|----------|---------------|---------------|--------------|---------------|---------------|
| HghtCls3 | -1.39 **      | -0.47         | -0.46        | -0.49 ***     | -0.49 ***     |
|          | (-2.18--0.60) | (-1.03-0.08)  | (-1.02-0.09) | (-0.76--0.23) | (-0.76--0.23) |
|          | (0.40)        | (0.28)        | (0.28)       | (0.14)        | (0.14)        |
| HghtCls4 | -0.80         | -0.11         | -0.09        | -0.31         | -0.28         |
|          | (-1.66-0.06)  | (-0.74-0.52)  | (-0.72-0.53) | (-0.62--0.00) | (-0.60-0.03)  |
|          | (0.44)        | (0.32)        | (0.32)       | (0.16)        | (0.16)        |
| HghtCls5 | -0.98         | -0.06         | -0.02        | -0.24         | -0.18         |
|          | (-1.95--0.02) | (-0.81-0.69)  | (-0.76-0.73) | (-0.61-0.12)  | (-0.56-0.20)  |
|          | (0.49)        | (0.38)        | (0.38)       | (0.19)        | (0.19)        |
| CrwnDns2 | -0.36         | 0.04          | 0.17         | -0.07         | -0.10         |
|          | (-1.01-0.29)  | (-0.62-0.70)  | (-0.52-0.85) | (-0.45-0.30)  | (-0.48-0.28)  |
|          | (0.33)        | (0.34)        | (0.35)       | (0.19)        | (0.19)        |
| CrwnDns3 | -0.60         | -0.67 *       | -0.48        | 0.20          | 0.20          |
|          | (-1.28-0.07)  | (-1.29--0.05) | (-1.14-0.17) | (-0.15-0.55)  | (-0.16-0.55)  |
|          | (0.34)        | (0.32)        | (0.34)       | (0.18)        | (0.18)        |
| CrwnDns4 |               | -0.14         | -0.03        | 0.14          | 0.14          |
|          |               | (-1.14-0.87)  | (-1.03-0.98) | (-0.33-0.60)  | (-0.32-0.61)  |
|          |               | (0.51)        | (0.51)       | (0.24)        | (0.24)        |

|              |    |    |    |    |    |     |              |               |               |
|--------------|----|----|----|----|----|-----|--------------|---------------|---------------|
| LandCover5   |    |    |    |    |    |     | -0.14        | -0.40         | -0.37         |
|              |    |    |    |    |    |     | (-1.02-0.73) | (-0.87-0.08)  | (-0.84-0.11)  |
|              |    |    |    |    |    |     | (0.45)       | (0.24)        | (0.24)        |
| LandCover6   |    |    |    |    |    |     | -0.57        | -0.44 **      | -0.43 **      |
|              |    |    |    |    |    |     | (-1.17-0.03) | (-0.75--0.14) | (-0.73--0.12) |
|              |    |    |    |    |    |     | (0.31)       | (0.16)        | (0.16)        |
| Observations | 95 | 95 | 91 | 91 | 71 | 157 | 157          | 160           | 160           |

1134

1135 **Appendix 13**

1136 **Table A6.** Foliar percent nitrogen trait coefficient estimates, confidence intervals, and standard error values for top ranked models (< 2  $\Delta AIC_c$ ). Species codes  
 1137 are used for balsam fir (ABBA), red maple (ACRU), white birch (BEPa), black spruce (PIMA), and lowbush blueberry (VAAN). If there is more than one top  
 1138 ranked model per species, we present in order of  $\Delta AIC_c$  rank. Model numbers are supplied beside the species code in the top row (see Table 1 for model  
 1139 descriptions). Predictors include land cover (LandCover5 and LandCover6 represent deciduous and mix wood conditions), EVI (i.e., proxy for productivity),  
 1140 abiotic factors (aspect, slope, elevation), and biotic factors: AgeCls3 (41-60 years old), AgeCls 4 (61-80 years old), AgeCls5 (81-100 years old), HghtCls3  
 1141 (6.6-9.5 m), HghtCls4 (9.6-12.5 m), HghtCls5 (12.6-15.5m), CrwnDns2 (51-75 % closed), CrwnDns3 (26-50%), CrwnDn4 (10-25 % closed). Total number of  
 1142 observations are provided in the bottom row. In addition, asterisks are used to indicate coefficient significance as follows: \*  $p < 0.05$  \*\*  $p < 0.01$  \*\*\*  $p < 0.001$ .

|                   | <b>ABBA 4</b>                      | <b>ACRU 6</b>                      | <b>ACRU 5</b>                      | <b>PIMA 7</b>                     | <b>VAAN 13</b>                    | <b>VAAN 11</b>                    |
|-------------------|------------------------------------|------------------------------------|------------------------------------|-----------------------------------|-----------------------------------|-----------------------------------|
| <i>Predictors</i> |                                    |                                    |                                    |                                   |                                   |                                   |
| Intercept         | 0.90 ***<br>(0.80-0.99)<br>(0.05)  | 2.17 ***<br>(1.87-2.47)<br>(0.15)  | 2.11 ***<br>(1.80-2.42)<br>(0.16)  | 0.84 ***<br>(0.74-0.94)<br>(0.05) | 1.27 ***<br>(1.24-1.30)<br>(0.02) | 1.29 ***<br>(1.21-1.37)<br>(0.04) |
| LandCover5        | -0.20 *<br>(-0.35--0.05)<br>(0.08) | -0.32 *<br>(-0.57--0.07)<br>(0.13) | -0.33 *<br>(-0.57--0.08)<br>(0.12) |                                   |                                   | -0.17<br>(-0.35-0.02)<br>(0.09)   |

|            |                                     |                                 |                                 |                                   |                                   |                                  |
|------------|-------------------------------------|---------------------------------|---------------------------------|-----------------------------------|-----------------------------------|----------------------------------|
| LandCover6 | -0.02<br>(-0.12-0.08)<br>(0.05)     | -0.10<br>(-0.29-0.09)<br>(0.09) | -0.10<br>(-0.28-0.09)<br>(0.09) |                                   |                                   | -0.02<br>(-0.11-0.07)<br>(0.05)  |
| EVI        | 0.04 *<br>(0.00-0.07)<br>(0.02)     |                                 | 0.04<br>(-0.02-0.09)<br>(0.03)  | 0.05 ***<br>(0.02-0.07)<br>(0.01) | 0.05 ***<br>(0.02-0.09)<br>(0.02) | 0.06 **<br>(0.02-0.10)<br>(0.02) |
| Aspect     | 0.02<br>(-0.02-0.06)<br>(0.02)      |                                 |                                 |                                   |                                   |                                  |
| Slope      | 0.00<br>(-0.04-0.04)<br>(0.02)      |                                 |                                 |                                   |                                   |                                  |
| Elevation  | -0.07 **<br>(-0.11--0.03)<br>(0.02) |                                 |                                 |                                   |                                   |                                  |

|          |                                      |                                      |                                      |
|----------|--------------------------------------|--------------------------------------|--------------------------------------|
| AgeCls3  | -0.45 **<br>(-0.76--0.14)<br>(0.16)  | -0.43 **<br>(-0.74--0.13)<br>(0.16)  | -0.16 ***<br>(-0.23--0.08)<br>(0.04) |
| AgeCls4  | -0.63 ***<br>(-0.95--0.30)<br>(0.16) | -0.56 **<br>(-0.89--0.22)<br>(0.17)  | -0.08<br>(-0.19-0.03)<br>(0.06)      |
| AgeCls5  | -0.51 ***<br>(-0.77--0.25)<br>(0.13) | -0.47 ***<br>(-0.73--0.21)<br>(0.13) | -0.07<br>(-0.16-0.01)<br>(0.04)      |
| HghtCls3 | 0.12<br>(-0.16-0.40)<br>(0.14)       | 0.14<br>(-0.14-0.43)<br>(0.14)       | 0.14 ***<br>(0.07-0.21)<br>(0.04)    |
| HghtCls4 | 0.23 *<br>(0.02-0.45)<br>(0.11)      | 0.23 *<br>(0.02-0.44)<br>(0.11)      | 0.09 *<br>(0.00-0.17)<br>(0.04)      |



|          |               |               |              |
|----------|---------------|---------------|--------------|
| HghtCls5 | 0.43 ***      | 0.40 ***      | 0.17 **      |
|          | (0.23-0.64)   | (0.19-0.61)   | (0.07-0.27)  |
|          | (0.10)        | (0.11)        | (0.05)       |
| CrwnDns2 | -0.18         | -0.15         | 0.09 *       |
|          | (-0.37--0.00) | (-0.34-0.04)  | (0.00-0.18)  |
|          | (0.09)        | (0.10)        | (0.04)       |
| CrwnDns3 | -0.25 *       | -0.23 *       | 0.06         |
|          | (-0.46--0.05) | (-0.43--0.03) | (-0.02-0.15) |
|          | (0.10)        | (0.10)        | (0.04)       |
| CrwnDns4 | -0.30 *       | -0.28 *       | 0.02         |
|          | (-0.54--0.05) | (-0.53--0.04) | (-0.11-0.16) |
|          | (0.13)        | (0.13)        | (0.07)       |

---

|              |    |    |    |     |     |     |
|--------------|----|----|----|-----|-----|-----|
| Observations | 95 | 91 | 91 | 157 | 160 | 160 |
|--------------|----|----|----|-----|-----|-----|

---

1144 **Appendix 14**

1145 **Table A7.** Foliar percent phosphorus trait coefficient estimates, confidence intervals, and standard error values for top ranked models (< 2  $\Delta AIC_c$ ). Species codes  
 1146 are used for balsam fir (ABBA), red maple (ACRU), white birch (BEPa), black spruce (PIMA), and lowbush blueberry (VAAN). If there is more than one top  
 1147 ranked model per species, we present in order of  $\Delta AIC_c$  rank. Model numbers are supplied beside the species code in the top row (see Table 1 for model  
 1148 descriptions). Predictors include land cover (LandCover5 and LandCover6 represent deciduous and mix wood conditions), EVI (i.e., proxy for productivity),  
 1149 abiotic factors (aspect, slope, elevation), and biotic factors: AgeCls3 (41-60 years old), AgeCls 4 (61-80 years old), AgeCls5 (81-100 years old), HghtCls3  
 1150 (6.6-9.5 m), HghtCls4 (9.6-12.5 m), HghtCls5 (12.6-15.5m), CrwnDns2 (51-75 % closed), CrwnDns3 (26-50%), CrwnDn4 (10-25 % closed). Total number of  
 1151 observations are provided in the bottom row. In addition, asterisks are used to indicate coefficient significance as follows: \*  $p < 0.05$  \*\*  $p < 0.01$  \*\*\*  $p < 0.001$ .

|                   | <b>ABBA 15</b>                    | <b>ACRU 13</b>                    | <b>ACRU 9</b>                     | <b>PIMA 10</b>                    | <b>PIMA 2</b>                     | <b>VAAN 7</b>                     | <b>VAAN 14</b>                    |
|-------------------|-----------------------------------|-----------------------------------|-----------------------------------|-----------------------------------|-----------------------------------|-----------------------------------|-----------------------------------|
| <i>Predictors</i> |                                   |                                   |                                   |                                   |                                   |                                   |                                   |
| Intercept         | 0.08 ***<br>(0.07-0.08)<br>(0.00) | 0.14 ***<br>(0.13-0.15)<br>(0.01) | 0.14 ***<br>(0.13-0.15)<br>(0.01) | 0.13 ***<br>(0.10-0.15)<br>(0.01) | 0.13 ***<br>(0.11-0.15)<br>(0.01) | 0.12 ***<br>(0.10-0.13)<br>(0.01) | 0.11 ***<br>(0.10-0.13)<br>(0.01) |
| Aspect            | 0.01 **<br>(0.00-0.02)<br>(0.00)  |                                   | 0.01<br>(-0.00-0.02)<br>(0.01)    | 0.00<br>(-0.01-0.01)<br>(0.00)    | 0.00<br>(-0.01-0.01)<br>(0.00)    |                                   |                                   |

|           |              |               |               |               |               |               |
|-----------|--------------|---------------|---------------|---------------|---------------|---------------|
| Slope     | 0.00         | 0.01          | 0.01 *        | 0.01 *        |               |               |
|           | (-0.00-0.01) | (-0.01-0.02)  | (0.00-0.01)   | (0.00-0.01)   |               |               |
|           | (0.00)       | (0.01)        | (0.00)        | (0.00)        |               |               |
| Elevation | 0.00         | 0.02 *        | 0.01 **       | 0.01 **       |               |               |
|           | (-0.01-0.01) | (0.00-0.03)   | (0.00-0.02)   | (0.00-0.02)   |               |               |
|           | (0.00)       | (0.01)        | (0.00)        | (0.00)        |               |               |
| EVI       |              | -0.01 *       | -0.01 *       | -0.00         | -0.00         |               |
|           |              | (-0.02--0.00) | (-0.02--0.00) | (-0.01-0.00)  | (-0.01--0.00) |               |
|           |              | (0.01)        | (0.01)        | (0.00)        | (0.00)        |               |
| AgeClss3  |              |               | -0.06 ***     | -0.06 ***     | -0.04 ***     | -0.04 ***     |
|           |              |               | (-0.09--0.04) | (-0.09--0.04) | (-0.05--0.03) | (-0.05--0.03) |
|           |              |               | (0.01)        | (0.01)        | (0.01)        | (0.01)        |
| AgeClss4  |              |               | -0.01         | -0.02         | -0.04 ***     | -0.03 ***     |
|           |              |               | (-0.03-0.01)  | (-0.05-0.01)  | (-0.06--0.02) | (-0.05--0.02) |
|           |              |               | (0.01)        | (0.01)        | (0.01)        | (0.01)        |

|          |               |               |               |               |
|----------|---------------|---------------|---------------|---------------|
| AgeCls5  | -0.02 *       | -0.02 *       | -0.04 ***     | -0.03 ***     |
|          | (-0.04--0.00) | (-0.05--0.00) | (-0.05--0.02) | (-0.05--0.02) |
|          | (0.01)        | (0.01)        | (0.01)        | (0.01)        |
| HghtCls3 | 0.02 *        | 0.02 *        | -0.00         | -0.00         |
|          | (0.00-0.04)   | (0.00-0.04)   | (-0.01-0.01)  | (-0.01-0.01)  |
|          | (0.01)        | (0.01)        | (0.01)        | (0.01)        |
| HghtCls4 | 0.00          | 0.00          | -0.00         | -0.01         |
|          | (-0.02-0.02)  | (-0.02-0.02)  | (-0.02-0.01)  | (-0.02-0.01)  |
|          | (0.01)        | (0.01)        | (0.01)        | (0.01)        |
| HghtCls5 | 0.02          | 0.02 *        | 0.00          | -0.00         |
|          | (-0.00-0.04)  | (0.00-0.05)   | (-0.01-0.02)  | (-0.02-0.01)  |
|          | (0.01)        | (0.01)        | (0.01)        | (0.01)        |
| CrwnDns2 | 0.01          | 0.01          | -0.00         | 0.00          |
|          | (-0.01-0.03)  | (-0.01-0.03)  | (-0.01-0.01)  | (-0.01-0.02)  |
|          | (0.01)        | (0.01)        | (0.01)        | (0.01)        |

|              |    |    |    |              |              |              |              |
|--------------|----|----|----|--------------|--------------|--------------|--------------|
| CrwnDns3     |    |    |    | 0.01         | 0.01         | -0.00        | -0.00        |
|              |    |    |    | (-0.01-0.03) | (-0.01-0.03) | (-0.02-0.01) | (-0.02-0.01) |
|              |    |    |    | (0.01)       | (0.01)       | (0.01)       | (0.01)       |
| CrwnDns4     |    |    |    | -0.00        | -0.00        | -0.01        | -0.01        |
|              |    |    |    | (-0.03-0.03) | (-0.03-0.03) | (-0.03-0.01) | (-0.03-0.01) |
|              |    |    |    | (0.02)       | (0.02)       | (0.01)       | (0.01)       |
| Observations | 95 | 91 | 91 | 157          | 157          | 160          | 160          |

1152

1153 *Appendix 15*

1154 **Table A8.** Foliar elemental quantity trait coefficient estimates, confidence intervals, and standard error values for top ranked models ( $< 2 \Delta AIC_c$ ). Species codes  
 1155 are used for balsam fir (ABBA), red maple (ACRU), white birch (BEPa), black spruce (PIMA), and lowbush blueberry (VAAN). If there is more than one top  
 1156 ranked model per species, we present in order of  $\Delta AIC_c$  rank. Model numbers are supplied beside the species code in the top row (see Table 1 for model  
 1157 descriptions). Predictors include land cover (LandCover5 and LandCover6 represent deciduous and mix wood conditions), EVI (i.e., proxy for productivity),  
 1158 abiotic factors (aspect, slope, elevation), and biotic factors: AgeCls3 (41-60 years old), AgeCls4 (61-80 years old), AgeCls5 (81-100 years old), HghtCls3  
 1159 (6.6-9.5 m), HghtCls4 (9.6-12.5 m), HghtCls5 (12.6-15.5m), CrwnDns2 (51-75 % closed), CrwnDns3 (26-50%), CrwnDn4 (10-25 % closed). In addition,  
 1160 asterisks are used to indicate coefficient significance as follows: \*  $p < 0.05$  \*\*  $p < 0.01$  \*\*\*  $p < 0.001$ .

|                   | ABBA QtyC 10                       | VAAN QtyC 8                     | ABBA QtyN 10                        | VAAN QtyN 8                     | VAAN QtyN 4                     | ABBA QtyP 10                       | VAANQtyP 8                      |
|-------------------|------------------------------------|---------------------------------|-------------------------------------|---------------------------------|---------------------------------|------------------------------------|---------------------------------|
| <i>Predictors</i> |                                    |                                 |                                     |                                 |                                 |                                    |                                 |
| Intercept         | 4.07 ***<br>(2.40-5.75)<br>(0.86)  | 1.58 *<br>(0.21-2.95)<br>(0.70) | 0.07 ***<br>(0.04-0.10)<br>(0.01)   | 0.04 *<br>(0.01-0.07)<br>(0.02) | 0.04 *<br>(0.01-0.08)<br>(0.02) | 0.01 ***<br>(0.00-0.01)<br>(0.00)  | 0.00 *<br>(0.00-0.00)<br>(0.00) |
| AgeCls3           | -2.53 *<br>(-4.42--0.64)<br>(0.97) |                                 | -0.04 **<br>(-0.08--0.01)<br>(0.02) |                                 |                                 | -0.00 *<br>(-0.01--0.00)<br>(0.00) |                                 |

|          |                                     |                                     |                                    |
|----------|-------------------------------------|-------------------------------------|------------------------------------|
| AgeClss4 | -1.77<br>(-3.65-0.11)<br>(0.96)     | -0.03<br>(-0.06-0.00)<br>(0.02)     | -0.00<br>(-0.01-0.00)<br>(0.00)    |
| AgeClss5 | -2.17 **<br>(-3.72--0.63)<br>(0.79) | -0.04 **<br>(-0.07--0.01)<br>(0.01) | -0.00 *<br>(-0.01--0.00)<br>(0.00) |
| HghtCls3 | -1.81 *<br>(-3.38--0.24)<br>(0.80)  | -0.03 *<br>(-0.06--0.00)<br>(0.01)  | -0.00 *<br>(-0.01--0.00)<br>(0.00) |
| HghtCls4 | -1.26<br>(-2.56-0.05)<br>(0.67)     | -0.02<br>(-0.04-0.00)<br>(0.01)     | -0.00<br>(-0.00-0.00)<br>(0.00)    |
| HghtCls5 | -1.44 *<br>(-2.86--0.03)<br>(0.72)  | -0.02<br>(-0.05-0.00)<br>(0.01)     | -0.00<br>(-0.00-0.00)<br>(0.00)    |

|          |              |              |              |              |              |              |              |
|----------|--------------|--------------|--------------|--------------|--------------|--------------|--------------|
| CrwnDns2 | -0.08        |              | -0.00        |              |              | 0.00         |              |
|          | (-1.26-1.09) |              | (-0.02-0.02) |              |              | (-0.00-0.00) |              |
|          | (0.60)       |              | (0.01)       |              |              | (0.00)       |              |
| CrwnDns3 | 0.39         |              | 0.01         |              |              | 0.00         |              |
|          | (-0.92-1.70) |              | (-0.02-0.03) |              |              | (-0.00-0.00) |              |
|          | (0.67)       |              | (0.01)       |              |              | (0.00)       |              |
| CrwnDns4 | 1.68         |              | 0.02         |              |              | 0.00         |              |
|          | (-0.21-3.57) |              | (-0.01-0.05) |              |              | (-0.00-0.00) |              |
|          | (0.96)       |              | (0.02)       |              |              | (0.00)       |              |
| Aspect   | -0.29        | 0.26         | -0.00        | 0.01         | 0.01         | 0.00         | 0.00         |
|          | (-0.78-0.21) | (-0.43-0.95) | (-0.01-0.01) | (-0.01-0.02) | (-0.01-0.02) | (-0.00-0.00) | (-0.00-0.00) |
|          | (0.25)       | (0.35)       | (0.00)       | (0.01)       | (0.01)       | (0.00)       | (0.00)       |
| Slope    | 0.67 **      | -0.17        | 0.01 **      | -0.00        | -0.00        | 0.00 ***     | -0.00        |
|          | (0.27-1.07)  | (-0.84-0.49) | (0.00-0.02)  | (-0.02-0.01) | (-0.02-0.01) | (0.00-0.00)  | (-0.00-0.00) |
|          | (0.20)       | (0.34)       | (0.00)       | (0.01)       | (0.01)       | (0.00)       | (0.00)       |



|              |              |              |              |              |              |              |              |
|--------------|--------------|--------------|--------------|--------------|--------------|--------------|--------------|
| Elevation    | 0.15         | 1.44 ***     | 0.00         | 0.03 ***     | 0.03 ***     | 0.00         | 0.00 **      |
|              | (-0.32-0.62) | (0.71-2.17)  | (-0.01-0.01) | (0.02-0.05)  | (0.02-0.05)  | (-0.00-0.00) | (0.00-0.00)  |
|              | (0.24)       | (0.37)       | (0.00)       | (0.01)       | (0.01)       | (0.00)       | (0.00)       |
| LandCover5   |              | 7.27 ***     |              | 0.14 ***     | 0.14 **      |              | 0.01 ***     |
|              |              | (3.80-10.73) |              | (0.07-0.22)  | (0.05-0.22)  |              | (0.01-0.02)  |
|              |              | (1.77)       |              | (0.04)       | (0.04)       |              | (0.00)       |
| LandCover6   |              | 0.06         |              | 0.01         | -0.00        |              | 0.00         |
|              |              | (-1.51-1.63) |              | (-0.03-0.04) | (-0.04-0.04) |              | (-0.00-0.00) |
|              |              | (0.80)       |              | (0.02)       | (0.02)       |              | (0.00)       |
| EVI          |              |              |              |              | 0.01         |              |              |
|              |              |              |              |              | (-0.01-0.02) |              |              |
|              |              |              |              |              | (0.01)       |              |              |
| Observations | 95           | 160          | 95           | 160          | 160          | 95           | 160          |

1162 **Appendix 16**

1163 **Table A9.** Foliar stoichiometric C:N trait coefficient estimates, confidence intervals, and standard error values for top ranked models (< 2 ΔAIC<sub>c</sub>). Species codes  
 1164 are used for balsam fir (ABBA), red maple (ACRU), white birch (BEPa), black spruce (PIMA), and lowbush blueberry (VAAN). If there is more than one top  
 1165 ranked model per species, we present in order of ΔAIC<sub>c</sub> rank. Model numbers are supplied beside the species code in the top row (see Table 1 for model  
 1166 descriptions). Predictors include land cover (LandCover5 and LandCover6 represent deciduous and mix wood conditions), EVI (i.e., proxy for productivity),  
 1167 abiotic factors (aspect, slope, elevation), and biotic factors: AgeCls3 (41-60 years old), AgeCls 4 (61-80 years old), AgeCls5 (81-100 years old), HghtCls3  
 1168 (6.6-9.5 m), HghtCls4 (9.6-12.5 m), HghtCls5 (12.6-15.5m), CrwnDns2 (51-75 % closed), CrwnDns3 (26-50%), CrwnDn4 (10-25 % closed). Total number of  
 1169 observations are provided in the bottom row. In addition, asterisks are used to indicate coefficient significance as follows: \*  $p < 0.05$  \*\*  $p < 0.01$  \*\*\*  $p < 0.001$ .

|                   | <b>ABBA 4</b>                        | <b>ACRU 6</b>                        | <b>ACRU 5</b>                        | <b>PIMA 7</b>                        | <b>VAAN 13</b>                       | <b>VAAN 11</b>                       |
|-------------------|--------------------------------------|--------------------------------------|--------------------------------------|--------------------------------------|--------------------------------------|--------------------------------------|
| <i>Predictors</i> |                                      |                                      |                                      |                                      |                                      |                                      |
| Intercept         | 70.34 ***<br>(63.17-77.51)<br>(3.66) | 23.77 ***<br>(16.69-30.85)<br>(3.61) | 25.12 ***<br>(17.75-32.48)<br>(3.76) | 70.61 ***<br>(63.24-77.99)<br>(3.76) | 48.81 ***<br>(47.71-49.91)<br>(0.56) | 48.14 ***<br>(45.35-50.93)<br>(1.42) |
| LandCover5        | 15.56 *<br>(3.85-27.27)<br>(5.98)    | 7.80 *<br>(2.01-13.59)<br>(2.95)     | 7.92 **<br>(2.15-13.70)<br>(2.95)    |                                      |                                      | 5.87<br>(-0.62-12.37)<br>(3.31)      |

|            |               |              |              |               |               |               |
|------------|---------------|--------------|--------------|---------------|---------------|---------------|
| LandCover6 | 2.24          | 3.02         | 2.98         |               |               | 0.60          |
|            | (-5.59-10.08) | (-1.36-7.40) | (-1.39-7.34) |               |               | (-2.67-3.86)  |
|            | (4.00)        | (2.24)       | (2.23)       |               |               | (1.66)        |
| EVI        | -3.48 **      |              | -0.80        | -3.26 ***     | -2.21 ***     | -2.45 ***     |
|            | (-6.00--0.96) |              | (-2.05-0.45) | (-5.16--1.36) | (-3.31--1.11) | (-3.79--1.11) |
|            | (1.29)        |              | (0.64)       | (0.97)        | (0.56)        | (0.68)        |
| Aspect     | -1.99         |              |              |               |               |               |
|            | (-4.90-0.92)  |              |              |               |               |               |
|            | (1.48)        |              |              |               |               |               |
| Slope      | -0.15         |              |              |               |               |               |
|            | (-3.25-2.96)  |              |              |               |               |               |
|            | (1.58)        |              |              |               |               |               |
| Elevation  | 4.90 **       |              |              |               |               |               |
|            | (1.75-8.05)   |              |              |               |               |               |
|            | (1.61)        |              |              |               |               |               |

|          |                                      |                                      |                                       |
|----------|--------------------------------------|--------------------------------------|---------------------------------------|
| AgeCls3  | 12.05 **<br>(4.81-19.29)<br>(3.69)   | 11.68 **<br>(4.45-18.92)<br>(3.69)   | 11.75 ***<br>(6.23-17.27)<br>(2.82)   |
| AgeCls4  | 16.38 ***<br>(8.79-23.97)<br>(3.87)  | 14.80 ***<br>(6.84-22.75)<br>(4.06)  | 8.10<br>(0.00-16.19)<br>(4.13)        |
| AgeCls5  | 13.51 ***<br>(7.45-19.58)<br>(3.09)  | 12.62 ***<br>(6.42-18.82)<br>(3.16)  | 7.42 *<br>(1.15-13.69)<br>(3.20)      |
| HghtCls3 | -4.60<br>(-11.19-1.98)<br>(3.36)     | -5.15<br>(-11.77-1.47)<br>(3.38)     | -9.44 ***<br>(-14.70--4.17)<br>(2.69) |
| HghtCls4 | -7.48 **<br>(-12.45--2.50)<br>(2.54) | -7.36 **<br>(-12.32--2.41)<br>(2.53) | -5.10<br>(-11.21-1.01)<br>(3.12)      |

|          |                |                |                |
|----------|----------------|----------------|----------------|
| HghtCls5 | -11.94 ***     | -11.30 ***     | -11.42 **      |
|          | (-16.77--7.10) | (-16.22--6.38) | (-18.77--4.08) |
|          | (2.47)         | (2.51)         | (3.75)         |
| CrwnDns2 | 4.10           | 3.38           | -6.14          |
|          | (-0.20-8.40)   | (-1.05-7.81)   | (-12.52-0.24)  |
|          | (2.19)         | (2.26)         | (3.26)         |
| CrwnDns3 | 6.04 *         | 5.51 *         | -5.22          |
|          | (1.28-10.79)   | (0.70-10.32)   | (-11.22-0.77)  |
|          | (2.43)         | (2.45)         | (3.06)         |
| CrwnDns4 | 6.98 *         | 6.67 *         | -1.90          |
|          | (1.19-12.77)   | (0.88-12.47)   | (-11.52-7.73)  |
|          | (2.96)         | (2.96)         | (4.91)         |

---

|              |    |    |    |     |     |     |
|--------------|----|----|----|-----|-----|-----|
| Observations | 95 | 91 | 91 | 157 | 160 | 160 |
|--------------|----|----|----|-----|-----|-----|

---

1171 **Appendix 17**

1172 **Table A10.** Foliar stoichiometric C:P trait coefficient estimates, confidence intervals, and standard error values for top ranked models ( $< 2 \Delta AIC_c$ ). Species codes  
 1173 are used for balsam fir (ABBA), red maple (ACRU), white birch (BEPa), black spruce (PIMA), and lowbush blueberry (VAAN). If there is more than one top  
 1174 ranked model per species, we present in order of  $\Delta AIC_c$  rank. Model numbers are supplied beside the species code in the top row (see Table 1 for model  
 1175 descriptions). Predictors include land cover (LandCover5 and LandCover6 represent deciduous and mix wood conditions), EVI (i.e., proxy for productivity),  
 1176 abiotic factors (aspect, slope, elevation), and biotic factors: AgeCls3 (41-60 years old), AgeCls 4 (61-80 years old), AgeCls5 (81-100 years old), HghtCls3  
 1177 (6.6-9.5 m), HghtCls4 (9.6-12.5 m), HghtCls5 (12.6-15.5m), CrwnDns2 (51-75 % closed), CrwnDns3 (26-50%), CrwnDn4 (10-25 % closed). Total number of  
 1178 observations are provided in the bottom row. In addition, asterisks are used to indicate coefficient significance as follows: \*  $p < 0.05$  \*\*  $p < 0.01$  \*\*\*  $p < 0.001$ .

|                   | <b>ABBA 15</b>                              | <b>PIMA 10</b>                              | <b>PIMA 2</b>                               | <b>VAAN 14</b>                              | <b>VAAN 7</b>                               |
|-------------------|---------------------------------------------|---------------------------------------------|---------------------------------------------|---------------------------------------------|---------------------------------------------|
| <i>Predictors</i> |                                             |                                             |                                             |                                             |                                             |
| Intercept         | 2060.13 ***<br>(1919.44-2200.82)<br>(71.78) | 1050.36 ***<br>(822.39-1278.32)<br>(116.31) | 1023.84 ***<br>(786.47-1261.22)<br>(121.11) | 1236.55 ***<br>(871.64-1601.45)<br>(186.18) | 1188.23 ***<br>(819.07-1557.39)<br>(188.35) |
| Aspect            | -251.44 **<br>(-424.38--78.50)<br>(88.24)   | -17.44<br>(-79.52-44.63)<br>(31.67)         | -16.83<br>(-79.00-45.34)<br>(31.72)         |                                             |                                             |

|           |                                      |                                           |                                           |                                           |                                           |
|-----------|--------------------------------------|-------------------------------------------|-------------------------------------------|-------------------------------------------|-------------------------------------------|
| Slope     | -85.87<br>(-263.30-91.56)<br>(90.53) | -87.56 **<br>(-146.45--28.67)<br>(30.05)  | -88.31 **<br>(-147.30--29.32)<br>(30.10)  |                                           |                                           |
| Elevation | 69.19<br>(-108.96-247.33)<br>(90.89) | -96.17 **<br>(-155.76--36.57)<br>(30.41)  | -88.44 **<br>(-151.06--25.83)<br>(31.95)  |                                           |                                           |
| AgeClss3  |                                      | 660.74 ***<br>(436.52-884.95)<br>(114.40) | 671.90 ***<br>(445.73-898.08)<br>(115.40) | 600.19 ***<br>(347.73-852.65)<br>(128.81) | 653.17 ***<br>(391.96-914.39)<br>(133.28) |
| AgeClss4  |                                      | 195.92<br>(-39.39-431.22)<br>(120.06)     | 255.05<br>(-21.81-531.91)<br>(141.26)     | 438.81 *<br>(82.57-795.06)<br>(181.76)    | 578.27 **<br>(177.66-978.87)<br>(204.39)  |
| AgeClss5  |                                      | 250.32 *<br>(58.96-441.68)<br>(97.64)     | 276.94 **<br>(74.47-479.42)<br>(103.31)   | 585.00 ***<br>(305.37-864.64)<br>(142.67) | 652.94 ***<br>(360.03-945.85)<br>(149.45) |

|          |                  |                  |                  |                  |
|----------|------------------|------------------|------------------|------------------|
| HghtCls3 | -204.19 *        | -201.20 *        | 18.98            | 18.95            |
|          | (-368.92--39.45) | (-366.30--36.09) | (-224.77-262.73) | (-223.87-261.76) |
|          | (84.05)          | (84.24)          | (124.37)         | (123.89)         |
| HghtCls4 | -15.32           | -22.18           | 118.38           | 84.36            |
|          | (-201.75-171.10) | (-209.61-165.24) | (-170.51-407.27) | (-206.97-375.69) |
|          | (95.12)          | (95.63)          | (147.39)         | (148.64)         |
| HghtCls5 | -198.13          | -219.18          | -6.08            | -90.02           |
|          | (-420.27-24.01)  | (-447.55-9.18)   | (-335.39-323.23) | (-436.61-256.58) |
|          | (113.34)         | (116.52)         | (168.02)         | (176.84)         |
| CrwnDns2 | -74.85           | -64.88           | -48.19           | -33.56           |
|          | (-269.80-120.10) | (-261.61-131.85) | (-384.27-287.89) | (-368.91-301.79) |
|          | (99.47)          | (100.37)         | (171.47)         | (171.10)         |
| CrwnDns3 | -109.94          | -109.96          | 49.93            | 45.40            |
|          | (-293.56-73.68)  | (-293.82-73.89)  | (-265.13-365.00) | (-268.51-359.31) |
|          | (93.69)          | (93.81)          | (160.75)         | (160.16)         |



|              |    |                  |                  |                  |                  |
|--------------|----|------------------|------------------|------------------|------------------|
| CrwnDns4     |    | 65.42            | 66.59            | 204.86           | 190.11           |
|              |    | (-231.27-362.11) | (-230.49-363.67) | (-224.67-634.39) | (-238.21-618.44) |
|              |    | (151.38)         | (151.58)         | (219.15)         | (218.54)         |
| EVI          |    |                  | 25.14            |                  | 69.94            |
|              |    |                  | (-36.66-86.93)   |                  | (-23.29-163.18)  |
|              |    |                  | (31.53)          |                  | (47.57)          |
| Observations | 95 | 157              | 157              | 160              | 160              |

1179

1180 **Appendix 18**

1181 **Table A11.** Foliar stoichiometric N:P trait coefficient estimates, confidence intervals, and standard error values for top ranked models ( $< 2 \Delta AIC_c$ ). Species  
 1182 codes are used for balsam fir (ABBA), red maple (ACRU), white birch (BEPA), black spruce (PIMA, and lowbush blueberry (VAAN). If there is more than one  
 1183 top ranked model per species, we present in order of  $\Delta AIC_c$  rank. Model numbers are supplied beside the species code in the top row (see Table 1 for model  
 1184 descriptions). Predictors include land cover (LandCover5 and LandCover6 represent deciduous and mix wood conditions), EVI (i.e., proxy for productivity),  
 1185 abiotic factors (aspect, slope, elevation), and biotic factors: AgeCls3 (41- 60 years old), AgeCls 4 (61- 80 years old), AgeCls5 (81-100 years old), HghtCls3  
 1186 (6.6-9.5 m), HghtCls4 (9.6-12.5 m), HghtCls5 (12.6-15.5m), CrwnDns2 (51-75 % closed), CrwnDns3 (26-50%), CrwnDn4 (10-25 % closed). Total number of  
 1187 observations are provided in the bottom row. In addition, asterisks are used to indicate coefficient significance as follows: \*  $p < 0.05$  \*\*  $p < 0.01$  \*\*\*  $p < 0.001$ .

|                   | <b>ACRU 9</b>                        | <b>PIMA 2</b>                        | <b>VAAN 2</b>                        | <b>VAAN 7</b>                        | <b>VAAN 1</b>                        | <b>VAAN 5</b>                        |
|-------------------|--------------------------------------|--------------------------------------|--------------------------------------|--------------------------------------|--------------------------------------|--------------------------------------|
| <i>Predictors</i> |                                      |                                      |                                      |                                      |                                      |                                      |
| Intercept         | 29.44 ***<br>(27.63-31.25)<br>(0.92) | 14.38 ***<br>(11.34-17.42)<br>(1.55) | 29.35 ***<br>(22.46-36.24)<br>(3.52) | 27.62 ***<br>(21.02-34.23)<br>(3.37) | 31.58 ***<br>(23.67-39.50)<br>(4.04) | 29.27 ***<br>(21.88-36.66)<br>(3.77) |
| EVI               | 2.37 *<br>(0.52-4.21)<br>(0.94)      | 1.45 ***<br>(0.66-2.24)<br>(0.40)    | 2.44 **<br>(0.70-4.19)<br>(0.89)     | 3.05 ***<br>(1.38-4.72)<br>(0.85)    | 2.63 **<br>(0.89-4.37)<br>(0.89)     | 3.26 ***<br>(1.58-4.94)<br>(0.86)    |

|           |                                     |                                     |                                     |                                     |                                     |                                     |
|-----------|-------------------------------------|-------------------------------------|-------------------------------------|-------------------------------------|-------------------------------------|-------------------------------------|
| Aspect    | -1.87<br>(-4.07-0.33)<br>(1.12)     | -0.42<br>(-1.22-0.37)<br>(0.41)     | -1.33<br>(-3.00-0.34)<br>(0.85)     | -1.30<br>(-2.96-0.36)<br>(0.85)     |                                     |                                     |
| Slope     | -2.52 *<br>(-4.72--0.33)<br>(1.12)  | -1.22 **<br>(-1.98--0.47)<br>(0.38) | 0.05<br>(-1.59-1.69)<br>(0.84)      | 0.26<br>(-1.42-1.94)<br>(0.86)      |                                     |                                     |
| Elevation | -3.67 **<br>(-5.84--1.50)<br>(1.11) | -0.88 *<br>(-1.68--0.08)<br>(0.41)  | -1.72 *<br>(-3.36--0.08)<br>(0.84)  | -1.74 *<br>(-3.38--0.11)<br>(0.83)  |                                     |                                     |
| AgeClss3  |                                     | 6.38 ***<br>(3.48-9.27)<br>(1.48)   | 11.99 ***<br>(5.63-18.35)<br>(3.24) | 13.24 ***<br>(8.57-17.91)<br>(2.38) | 11.98 ***<br>(5.58-18.37)<br>(3.26) | 13.57 ***<br>(8.89-18.25)<br>(2.39) |
| AgeClss4  |                                     | 2.45<br>(-1.10-5.99)<br>(1.81)      | 7.76<br>(-0.20-15.73)<br>(4.06)     | 10.93 **<br>(3.76-18.10)<br>(3.66)  | 6.42<br>(-2.25-15.10)<br>(4.43)     | 10.27 **<br>(2.64-17.90)<br>(3.89)  |

|          |              |              |              |              |              |
|----------|--------------|--------------|--------------|--------------|--------------|
| AgeCls5  | 2.48         | 11.98 ***    | 13.45 ***    | 12.28 ***    | 14.00 ***    |
|          | (-0.11-5.07) | (6.45-17.51) | (8.21-18.69) | (6.64-17.91) | (8.69-19.32) |
|          | (1.32)       | (2.82)       | (2.67)       | (2.88)       | (2.71)       |
| HghtCls3 | -0.55        | -1.98        | -1.26        | -2.28        | -1.61        |
|          | (-2.66-1.56) | (-6.35-2.39) | (-5.61-3.08) | (-6.65-2.09) | (-5.96-2.74) |
|          | (1.08)       | (2.23)       | (2.22)       | (2.23)       | (2.22)       |
| HghtCls4 | 0.93         | 1.17         | 1.20         | 0.62         | 0.64         |
|          | (-1.47-3.33) | (-3.99-6.32) | (-4.02-6.41) | (-4.55-5.79) | (-4.59-5.88) |
|          | (1.22)       | (2.63)       | (2.66)       | (2.64)       | (2.67)       |
| HghtCls5 | -0.06        | -2.31        | -2.89        | -2.30        | -2.85        |
|          | (-2.98-2.86) | (-8.54-3.92) | (-9.09-3.31) | (-8.50-3.89) | (-9.03-3.33) |
|          | (1.49)       | (3.18)       | (3.16)       | (3.16)       | (3.15)       |
| CrwnDns2 | 0.55         | -2.84        | -2.39        | -1.37        | -0.95        |
|          | (-1.97-3.06) | (-8.86-3.19) | (-8.39-3.61) | (-7.56-4.81) | (-7.16-5.27) |
|          | (1.28)       | (3.07)       | (3.06)       | (3.16)       | (3.17)       |

|              |              |              |              |               |               |
|--------------|--------------|--------------|--------------|---------------|---------------|
| CrwnDns3     | -0.52        | -1.46        | -1.84        | -0.06         | -0.58         |
|              | (-2.87-1.83) | (-7.02-4.10) | (-7.46-3.77) | (-5.83-5.71)  | (-6.41-5.26)  |
|              | (1.20)       | (2.84)       | (2.87)       | (2.94)        | (2.98)        |
| CrwnDns4     | 0.66         | -0.13        | 0.06         | 0.48          | 0.62          |
|              | (-3.14-4.46) | (-7.71-7.44) | (-7.60-7.73) | (-7.10-8.06)  | (-7.07-8.31)  |
|              | (1.94)       | (3.86)       | (3.91)       | (3.87)        | (3.92)        |
| LandCover5   |              |              |              | -7.48         | -7.02         |
|              |              |              |              | (-15.25-0.29) | (-14.86-0.83) |
|              |              |              |              | (3.97)        | (4.00)        |
| LandCover6   |              |              |              | -3.46         | -3.00         |
|              |              |              |              | (-8.47-1.56)  | (-7.92-1.91)  |
|              |              |              |              | (2.56)        | (2.51)        |
| Observations | 91           | 157          | 160          | 160           | 160           |

1189 **Appendix 19**

1190 **Table A12.** Part one of three for foliar phytochemical trait coefficient estimates, confidence intervals, and standard error values for top ranked models ( $< 2$   
 1191  $\Delta AIC_c$ ). Species codes are used for balsam fir (ABBA), red maple (ACRU), white birch (BEPa), black spruce (PIMA), and lowbush blueberry (VAAN). If there  
 1192 is more than one top ranked model per species, we present in order of  $\Delta AIC_c$  rank. Model numbers are supplied beside the species code in the top row (see Table  
 1193 1 for model descriptions). Models denoted with the suffix “r” and “b” represent raw and biomass basis respectively. Predictors include land cover (LandCover5  
 1194 and LandCover6 represent deciduous and mix wood conditions), EVI (i.e., proxy for productivity), abiotic factors (aspect, slope, elevation), and biotic factors:  
 1195 AgeCls3 (41-60 years old), AgeCls 4 (61-80 years old), AgeCls5 (81-100 years old), HghtCls3 (6.6-9.5 m), HghtCls4 (9.6-12.5 m), HghtCls5 (12.6-15.5m),  
 1196 CrwnDns2 (51-75 % closed), CrwnDns3 (26-50%), CrwnDn4 (10-25 % closed). Total number of observations are provided in the bottom row. In addition,  
 1197 asterisks are used to indicate coefficient significance as follows: \*  $p < 0.05$  \*\*  $p < 0.01$  \*\*\*  $p < 0.001$ .

|                   | <b>ABBA</b>    | <b>PIMA</b>       | <b>PIMA</b>    | <b>ABBA</b>    | <b>ABBA</b>        | <b>ABBA</b>        | <b>ABBA</b>        | <b>PIMA</b>        | <b>ABBA</b>        |
|-------------------|----------------|-------------------|----------------|----------------|--------------------|--------------------|--------------------|--------------------|--------------------|
|                   | <b>Terpene</b> | <b>PIMA</b>       | <b>Terpene</b> | <b>Terpene</b> | <b>Monoterpene</b> | <b>Monoterpene</b> | <b>Monoterpene</b> | <b>Monoterpene</b> | <b>Monoterpene</b> |
|                   | <b>13r</b>     | <b>Terpene 2r</b> | <b>10r</b>     | <b>10b</b>     | <b>9r</b>          | <b>15r</b>         | <b>13r</b>         | <b>10r</b>         | <b>10b</b>         |
| <i>Predictors</i> |                |                   |                |                |                    |                    |                    |                    |                    |
| Intercept         | 13.69 ***      | 16.02 ***         | 15.17 ***      | 73.58 ***      | 7.63 ***           | 7.63 ***           | 7.63 ***           | 5.12 ***           | 41.28 ***          |
|                   | (13.07-        | (12.11-           | (11.38-        | (33.79-        | (7.20-8.07)        | (7.19-8.07)        | (7.19-8.08)        | (3.88-6.35)        | (17.85-64.71)      |
|                   | 14.32)         | 19.93)            | 18.96)         | 113.37)        | (0.22)             | (0.22)             | (0.23)             | (0.63)             | (11.95)            |
|                   | (0.32)         | (2.00)            | (1.93)         | (20.30)        |                    |                    |                    |                    |                    |

|          |             |             |             |             |  |             |                |
|----------|-------------|-------------|-------------|-------------|--|-------------|----------------|
| EVI      | 0.73 *      | -0.83       |             | 0.45        |  | 0.48 *      |                |
|          | (0.10-1.36) | (-1.85-     |             | (0.00-0.90) |  | (0.03-0.93) |                |
|          | (0.32)      | 0.20)       |             | (0.23)      |  | (0.23)      |                |
|          |             | (0.52)      |             |             |  |             |                |
| AgeClss3 |             | 8.84 ***    | 9.28 ***    | -49.73 *    |  | 2.66 ***    | -30.43 *       |
|          |             | (5.10-      | (5.55-      | (-97.16--   |  | (1.44-3.87) | (-58.35--2.50) |
|          |             | 12.59)      | 13.00)      | 2.31)       |  | (0.62)      | (14.25)        |
|          |             | (1.91)      | (1.90)      | (24.20)     |  |             |                |
| AgeClss4 |             | 4.11        | 6.09 **     | -24.13      |  | 2.29 ***    | -14.26         |
|          |             | (-0.47-     | (2.19-9.99) | (-70.13-    |  | (1.02-3.56) | (-41.35-       |
|          |             | 8.70)       | (1.99)      | 21.87)      |  | (0.65)      | 12.83)         |
|          |             | (2.34)      |             | (23.47)     |  |             | (13.82)        |
| AgeClss5 |             | 5.41 **     | 6.31 ***    | -37.93      |  | 1.83 ***    | -22.02         |
|          |             | (2.05-8.77) | (3.12-9.49) | (-75.56--   |  | (0.79-2.87) | (-44.17-0.14)  |
|          |             | (1.71)      | (1.62)      | 0.31)       |  | (0.53)      | (11.30)        |
|          |             |             |             | (19.20)     |  |             |                |

|          |         |          |          |               |               |
|----------|---------|----------|----------|---------------|---------------|
| HghtCls3 | -2.67   | -2.65    | -30.52   | -1.09 *       | -15.95        |
|          | (-5.35- | (-5.34-  | (-71.55- | (-1.97--0.21) | (-40.11-8.21) |
|          | 0.00)   | 0.04)    | 10.51)   | (0.45)        | (12.33)       |
|          | (1.37)  | (1.37)   | (20.93)  |               |               |
| HghtCls4 | -2.86   | -3.14 *  | -23.45   | -1.04 *       | -12.72        |
|          | (-5.97- | (-6.25-- | (-57.58- | (-2.06--0.03) | (-32.82-7.37) |
|          | 0.25)   | 0.03)    | 10.68)   | (0.52)        | (10.25)       |
|          | (1.59)  | (1.59)   | (17.41)  |               |               |
| HghtCls5 | -2.06   | -2.79    | -31.17   | -0.86         | -18.03        |
|          | (-5.89- | (-6.53-  | (-68.43- | (-2.08-0.36)  | (-39.97-3.91) |
|          | 1.78)   | 0.95)    | 6.09)    | (0.62)        | (11.19)       |
|          | (1.95)  | (1.91)   | (19.01)  |               |               |
| CrwnDns2 | 1.05    | 1.40     | 3.75     | 0.90          | 2.67          |
|          | (-2.24- | (-1.88-  | (-27.06- | (-0.17-1.97)  | (-15.47-      |
|          | 4.33)   | 4.67)    | 34.55)   | (0.55)        | 20.81)        |
|          | (1.68)  | (1.67)   | (15.72)  |               | (9.25)        |



|          |          |          |              |              |              |               |              |
|----------|----------|----------|--------------|--------------|--------------|---------------|--------------|
| CrwnDns3 | 1.56     | 1.57     | 12.28        |              |              | 0.76          | 8.56         |
|          | (-1.52-  | (-1.54-  | (-21.71-     |              |              | (-0.25-1.77)  | (-11.45-     |
|          | 4.65)    | 4.67)    | 46.27)       |              |              | (0.52)        | 28.57)       |
|          | (1.57)   | (1.58)   | (17.34)      |              |              |               | (10.21)      |
| CrwnDns4 | 4.20     | 4.24     | 46.34        |              |              | 1.37          | 29.79 *      |
|          | (-0.81-  | (-0.80-  | (-3.47-      |              |              | (-0.28-3.01)  | (0.46-59.11) |
|          | 9.21)    | 9.27)    | 96.14)       |              |              | (0.84)        | (14.96)      |
|          | (2.56)   | (2.57)   | (25.41)      |              |              |               |              |
| Aspect   | -0.11    | -0.11    | -2.23        | -0.09        | -0.00        | -0.19         | -1.55        |
|          | (-1.14-  | (-1.15-  | (-14.14-     | (-0.62-0.44) | (-0.53-0.53) | (-0.53-0.15)  | (-8.57-5.47) |
|          | 0.92)    | 0.92)    | 9.69)        | (0.27)       | (0.27)       | (0.17)        | (3.58)       |
|          | (0.52)   | (0.53)   | (6.08)       |              |              |               |              |
| Slope    | -1.60 ** | -1.61 ** | 20.40 ***    | 0.67 *       | 0.75 **      | -0.38 *       | 12.61 ***    |
|          | (-2.61-- | (-2.63-- | (9.52-31.28) | (0.11-1.22)  | (0.19-1.30)  | (-0.71--0.04) | (6.20-19.02) |
|          | 0.59)    | 0.60)    | (5.55)       | (0.28)       | (0.28)       | (0.17)        | (3.27)       |
|          | (0.52)   | (0.52)   |              |              |              |               |              |

|              |           |           |         |              |              |     |               |               |
|--------------|-----------|-----------|---------|--------------|--------------|-----|---------------|---------------|
| Elevation    | -2.69 *** | -2.45 *** | 7.45    | 0.29         | 0.28         |     | -0.70 ***     | 4.55          |
|              | (-3.69--  | (-3.41--  | (-4.62- | (-0.26-0.85) | (-0.28-0.84) |     | (-1.01--0.38) | (-2.55-11.66) |
|              | 1.68)     | 1.49)     | 19.52)  | (0.28)       | (0.29)       |     | (0.16)        | (3.63)        |
|              | (0.51)    | (0.49)    | (6.16)  |              |              |     |               |               |
| Observations | 104       | 163       | 163     | 104          | 104          | 104 | 163           | 104           |

1198

1199 **Table A13.** Part two of three for foliar phytochemical trait coefficient estimates, confidence intervals, and standard error values for top ranked models ( $< 2$   
1200  $\Delta AIC_c$ ). Species codes are used for balsam fir (ABBA), red maple (ACRU), white birch (BEPA), black spruce (PIMA, and lowbush blueberry (VAAN). If there  
1201 is more than one top ranked model per species, we present in order of  $\Delta AIC_c$  rank. Model numbers are supplied beside the species code in the top row (see Table  
1202 1 for model descriptions). Codes are used for monoterpene alcohol (MA) and monoterpene ester (ME). Models denoted with the suffix “r” and “b” represent  
1203 raw and biomass basis respectively. Predictors include land cover (LandCover5 and LandCover6 represent deciduous and mix wood conditions), EVI (i.e., proxy  
1204 for productivity), abiotic factors (aspect, slope, elevation), and biotic factors: AgeCls3 (41-60 years old), AgeCls 4 (61-80 years old), AgeCls5 (81-100 years  
1205 old), HghtCls3 (6.6-9.5 m), HghtCls4 (9.6-12.5 m), HghtCls5 (12.6-15.5m), CrwnDns2 (51-75 % closed), CrwnDns3 (26-50%), CrwnDn4 (10-25 % closed).  
1206 Total number of observations are provided in the bottom row. In addition, asterisks are used to indicate coefficient significance as follows: \*  $p < 0.05$  \*\*  
1207  $p < 0.01$  \*\*\*  $p < 0.001$ .

|                   | <b>PIMA MA 10r</b>                | <b>PIMA ME 10r</b>                | <b>PIMA ME 2r</b>                 | <b>ABBA ME 10b</b>                  |
|-------------------|-----------------------------------|-----------------------------------|-----------------------------------|-------------------------------------|
| <i>Predictors</i> |                                   |                                   |                                   |                                     |
| Intercept         | 0.23 ***<br>(0.15-0.31)<br>(0.04) | 4.37 ***<br>(2.97-5.76)<br>(0.71) | 4.57 ***<br>(3.13-6.02)<br>(0.74) | 12.89 ***<br>(6.12-19.66)<br>(3.45) |
| AgeCls3           | 0.19 ***<br>(0.10-0.27)<br>(0.04) | 3.21 ***<br>(1.84-4.58)<br>(0.70) | 3.10 ***<br>(1.72-4.49)<br>(0.71) | -7.81<br>(-15.88-0.26)<br>(4.12)    |

|          |                                     |                                     |                                     |                                  |
|----------|-------------------------------------|-------------------------------------|-------------------------------------|----------------------------------|
| AgeClss4 | 0.17 ***<br>(0.09-0.26)<br>(0.04)   | 2.66 ***<br>(1.22-4.09)<br>(0.73)   | 2.17 *<br>(0.47-3.87)<br>(0.87)     | -3.97<br>(-11.80-3.85)<br>(3.99) |
| AgeClss5 | 0.13 ***<br>(0.06-0.20)<br>(0.04)   | 2.17 ***<br>(1.00-3.35)<br>(0.60)   | 1.95 **<br>(0.71-3.20)<br>(0.63)    | -6.36<br>(-12.76-0.04)<br>(3.27) |
| HghtCls3 | -0.08 **<br>(-0.14--0.02)<br>(0.03) | -1.33 **<br>(-2.32--0.34)<br>(0.51) | -1.33 **<br>(-2.33--0.34)<br>(0.51) | -5.78<br>(-12.76-1.20)<br>(3.56) |
| HghtCls4 | -0.06<br>(-0.13-0.00)<br>(0.03)     | -0.99<br>(-2.13-0.16)<br>(0.58)     | -0.92<br>(-2.07-0.23)<br>(0.59)     | -4.38<br>(-10.18-1.43)<br>(2.96) |
| HghtCls5 | -0.04<br>(-0.13-0.04)<br>(0.04)     | -0.67<br>(-2.05-0.71)<br>(0.70)     | -0.49<br>(-1.91-0.93)<br>(0.72)     | -5.86<br>(-12.19-0.48)<br>(3.23) |

|          |                                     |                                    |                                    |                                  |
|----------|-------------------------------------|------------------------------------|------------------------------------|----------------------------------|
| CrwnDns2 | 0.05<br>(-0.02-0.12)<br>(0.04)      | 0.87<br>(-0.33-2.08)<br>(0.62)     | 0.79<br>(-0.43-2.01)<br>(0.62)     | 0.53<br>(-4.71-5.77)<br>(2.67)   |
| CrwnDns3 | 0.04<br>(-0.02-0.11)<br>(0.03)      | 0.69<br>(-0.45-1.83)<br>(0.58)     | 0.69<br>(-0.45-1.83)<br>(0.58)     | 1.89<br>(-3.90-7.67)<br>(2.95)   |
| CrwnDns4 | 0.14 *<br>(0.03-0.25)<br>(0.06)     | 1.16<br>(-0.69-3.02)<br>(0.95)     | 1.15<br>(-0.70-3.01)<br>(0.95)     | 6.61<br>(-1.86-15.09)<br>(4.32)  |
| Aspect   | -0.00<br>(-0.02-0.02)<br>(0.01)     | -0.08<br>(-0.47-0.30)<br>(0.19)    | -0.08<br>(-0.46-0.30)<br>(0.19)    | -0.06<br>(-2.08-1.97)<br>(1.03)  |
| Slope    | -0.03 **<br>(-0.05--0.01)<br>(0.01) | -0.42 *<br>(-0.79--0.05)<br>(0.19) | -0.42 *<br>(-0.79--0.04)<br>(0.19) | 3.15 **<br>(1.30-5.01)<br>(0.94) |

|              |               |               |               |              |
|--------------|---------------|---------------|---------------|--------------|
| Elevation    | -0.03 *       | -0.73 ***     | -0.79 ***     | 1.32         |
|              | (-0.05--0.00) | (-1.08--0.37) | (-1.16--0.41) | (-0.73-3.38) |
|              | (0.01)        | (0.18)        | (0.19)        | (1.05)       |
| EVI          |               |               | -0.20         |              |
|              |               |               | (-0.58-0.18)  |              |
|              |               |               | (0.19)        |              |
| Observations | 163           | 163           | 163           | 104          |

1208

1209 **Table A14.** Part three of three for foliar phytochemical trait coefficient estimates, confidence intervals, and standard error values for top ranked models ( $< 2$   
1210  $\Delta AIC_c$ ). Species codes are used for balsam fir (ABBA), red maple (ACRU), white birch (BEPA), black spruce (PIMA, and lowbush blueberry (VAAN). If there  
1211 is more than one top ranked model per species, we present in order of  $\Delta AIC_c$  rank. Model numbers are supplied beside the species code in the top row (see Table  
1212 1 for model descriptions). Sesquiterpene is truncated as sesq. Models denoted with the suffix “r” and “b” represent raw and biomass basis respectively.  
1213 Predictors include land cover (LandCover5 and LandCover6 represent deciduous and mix wood conditions), EVI (i.e., proxy for productivity), abiotic factors  
1214 (aspect, slope, elevation), and biotic factors: AgeCls3 (41-60 years old), AgeCls 4 (61-80 years old), AgeCls5 (81-100 years old), HghtCls3 (6.6-9.5 m),  
1215 HghtCls4 (9.6-12.5 m), HghtCls5 (12.6-15.5m), CrwnDns2 (51-75 % closed), CrwnDns3 (26-50%), CrwnDn4 (10-25 % closed). Total number of observations  
1216 are provided in the bottom row. In addition, asterisks are used to indicate coefficient significance as follows: \*  $p < 0.05$  \*\*  $p < 0.01$  \*\*\*  $p < 0.001$ .

|                   | <b>ABBA Sesq<br/>9r</b>           | <b>ABBA<br/>Sesq 13r</b>          | <b>ABBA<br/>Sesq 15r</b>          | <b>PIMA<br/>Sesq 4r</b>           | <b>PIMA<br/>Sesq 15r</b>          | <b>PIMA<br/>Sesq 2r</b>           | <b>PIMA<br/>Sesq 9r</b>           | <b>PIMA<br/>Diversity<br/>12</b>  | <b>PIMA<br/>Diversity<br/>14</b>  | <b>PIMA<br/>Diversity<br/>13</b>  |
|-------------------|-----------------------------------|-----------------------------------|-----------------------------------|-----------------------------------|-----------------------------------|-----------------------------------|-----------------------------------|-----------------------------------|-----------------------------------|-----------------------------------|
| <i>Predictors</i> |                                   |                                   |                                   |                                   |                                   |                                   |                                   |                                   |                                   |                                   |
| Intercept         | 1.38 ***<br>(1.30-1.47)<br>(0.04) | 1.38 ***<br>(1.29-1.47)<br>(0.04) | 1.38 ***<br>(1.30-1.47)<br>(0.04) | 0.58 ***<br>(0.48-0.67)<br>(0.05) | 0.66 ***<br>(0.63-0.70)<br>(0.02) | 0.66 ***<br>(0.46-0.86)<br>(0.10) | 0.66 ***<br>(0.63-0.70)<br>(0.02) | 2.23 ***<br>(2.21-2.26)<br>(0.01) | 2.28 ***<br>(2.22-2.34)<br>(0.03) | 2.26 ***<br>(2.25-2.27)<br>(0.01) |
| EVI               | 0.08<br>(-0.00-0.17)<br>(0.05)    | 0.09 *<br>(0.01-0.18)<br>(0.05)   |                                   | -0.05 *<br>(-0.10-0.00)<br>(0.02) |                                   | -0.06 *<br>(-0.11- -<br>(0.02)    | -0.02<br>(-0.06-0.02)<br>(0.02)   |                                   |                                   | 0.01<br>(-0.00-0.02)<br>(0.01)    |

|            |               |               |               |               |               |               |
|------------|---------------|---------------|---------------|---------------|---------------|---------------|
|            |               |               |               |               | 0.01)         |               |
|            |               |               |               |               | (0.03)        |               |
| Aspect     | -0.05         | -0.03         | -0.03         | -0.03         | 0.01          | -0.03         |
|            | (-0.15-0.06)  | (-0.13-0.08)  | (-0.07-0.01)  | (-0.07-0.02)  | (-0.04-0.07)  | (-0.07-0.02)  |
|            | (0.05)        | (0.05)        | (0.02)        | (0.02)        | (0.03)        | (0.02)        |
| Slope      | -0.06         | -0.04         | -0.03         | -0.02         | -0.06 *       | -0.02         |
|            | (-0.17-0.05)  | (-0.15-0.07)  | (-0.07-0.02)  | (-0.06-0.02)  | (-0.11--0.01) | (-0.06-0.02)  |
|            | (0.06)        | (0.06)        | (0.02)        | (0.02)        | (0.03)        | (0.02)        |
| Elevation  | -0.15 *       | -0.15 *       | -0.09 ***     | -0.08 ***     | -0.13 ***     | -0.08 ***     |
|            | (-0.25--0.04) | (-0.26--0.04) | (-0.14--0.05) | (-0.13--0.04) | (-0.19--0.08) | (-0.13--0.04) |
|            | (0.06)        | (0.06)        | (0.02)        | (0.02)        | (0.03)        | (0.02)        |
| LandCover5 |               |               | -0.02         |               |               | 0.03          |
|            |               |               | (-0.23-0.18)  |               |               | (-0.04-0.09)  |
|            |               |               | (0.10)        |               |               | (0.03)        |
| LandCover6 |               |               | 0.12 *        |               |               | 0.04 **       |
|            |               |               | (0.00-0.23)   |               |               | (0.01-0.07)   |
|            |               |               | (0.06)        |               |               | (0.01)        |



|          |                                  |                                     |
|----------|----------------------------------|-------------------------------------|
| AgeCls3  | 0.26 **<br>(0.07-0.46)<br>(0.10) | -0.04 *<br>(-0.09--0.00)<br>(0.02)  |
| AgeCls4  | -0.06<br>(-0.30-0.17)<br>(0.12)  | -0.09 **<br>(-0.15--0.03)<br>(0.03) |
| AgeCls5  | 0.15<br>(-0.02-0.32)<br>(0.09)   | -0.05 *<br>(-0.10--0.00)<br>(0.03)  |
| HghtCls3 | -0.03<br>(-0.17-0.10)<br>(0.07)  | 0.05 *<br>(0.01-0.09)<br>(0.02)     |
| HghtCls4 | -0.08<br>(-0.24-0.08)<br>(0.08)  | 0.04<br>(-0.02-0.09)<br>(0.03)      |
| HghtCls5 | -0.07<br>(-0.27-0.13)<br>(0.10)  | 0.06 *<br>(0.00-0.12)<br>(0.03)     |

|          |  |  |  |  |  |              |  |  |  |              |
|----------|--|--|--|--|--|--------------|--|--|--|--------------|
| CrwnDns2 |  |  |  |  |  | -0.05        |  |  |  | -0.01        |
|          |  |  |  |  |  | (-0.22-0.12) |  |  |  | (-0.06-0.04) |
|          |  |  |  |  |  | (0.09)       |  |  |  | (0.03)       |
| CrwnDns3 |  |  |  |  |  | -0.03        |  |  |  | -0.00        |
|          |  |  |  |  |  | (-0.19-0.13) |  |  |  | (-0.05-0.05) |
|          |  |  |  |  |  | (0.08)       |  |  |  | (0.03)       |
| CrwnDns4 |  |  |  |  |  | 0.07         |  |  |  | -0.04        |
|          |  |  |  |  |  | (-0.19-0.32) |  |  |  | (-0.12-0.05) |
|          |  |  |  |  |  | (0.13)       |  |  |  | (0.04)       |

---

|              |     |     |     |     |     |     |     |     |     |     |
|--------------|-----|-----|-----|-----|-----|-----|-----|-----|-----|-----|
| Observations | 104 | 104 | 104 | 163 | 163 | 163 | 163 | 163 | 163 | 163 |
|--------------|-----|-----|-----|-----|-----|-----|-----|-----|-----|-----|

---

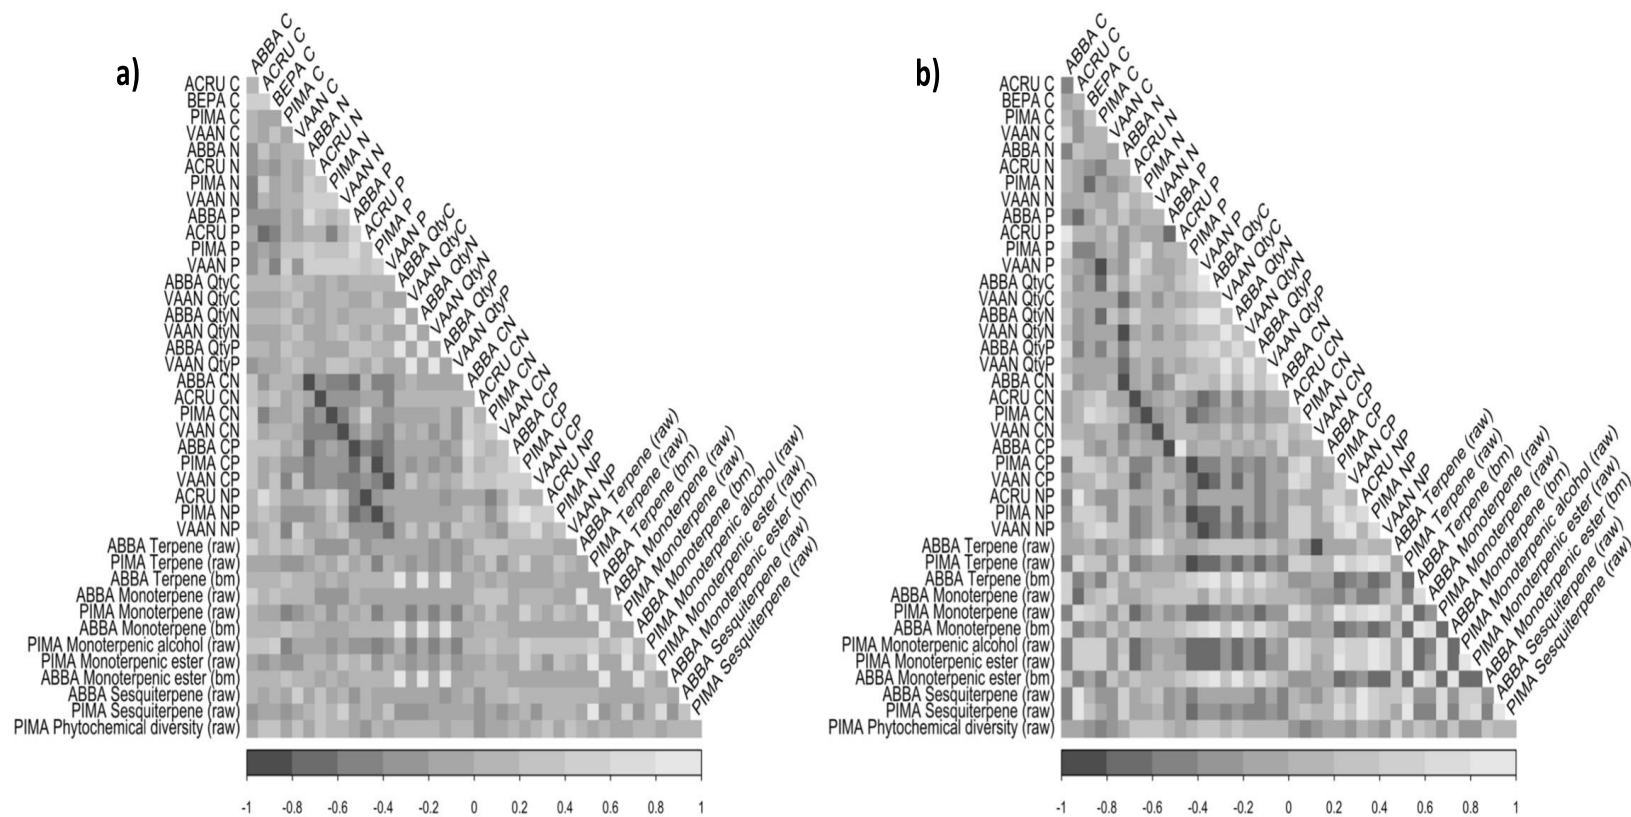

1219

1220 **Figure A6.** Correlation plot showing the relationships between our study species foliar elemental, stoichiometric, and phytochemical traits for top ranked models

1221 where the intercept was not with  $< 2 \Delta AIC_c$ . The left correlation plot (a) shows data space comparisons, for this we only compared plots in which all species

1222 were present ( $n = 29$ ). The right correlation plot (b) shows spatial comparisons of predictive trait raster/surfaces. Correlation in data space is limited to co-

1223 occurrence of observations, while spatial correlation considers all pixels. In panel (b), we can see emergent patterns that are less apparent in data space  
1224 comparisons (a).
